# Supplementary material for: Base-mediated unprecedented tandem cyclization reaction of nitrilimines and sulfur ylides: facile approaches to multifunctionalized pyrazolines
Source: Royal Society of Chemistry journal article supplement (doi:10.1039/d2qo00232a), 2022-01-01
Supplement: d2qo00232a1.pdf [file d2qo00232a1.pdf]

## Supporting Information

### Base-mediated unprecedented tandem cyclization reaction of nitrilimines and sulfur ylides: facile approaches to multifunctionalized pyrazolines

Chaofan Wang,<sup>a</sup> Ling Fang,<sup>\*b</sup> Lingling Zhang,<sup>a</sup> Ya Wang,<sup>a</sup> Fang Gao<sup>a</sup> and Zhiyong  
Wang<sup>\*a</sup>

<sup>a</sup>*School of Chemistry and Chemical Engineering, Chongqing University, Chongqing  
401331, P. R. China*

<sup>b</sup>*College of Environment and Resources, Chongqing Technology and Business  
University, Chongqing 400067, P. R. China*

E-mail: zwang@cqu.edu.cn, lynnf@163.com

#### Table of Contents

1. General Informations (S2)
2. General procedure for the tandem reaction of hydrazonoyl chlorides **1** with sulfonium salts **2** (S3)
3. Experimental procedure for the scaled-up synthesis of compound **3ba** (S3)
4. Experimental procedure for the scaled-up synthesis of compound **3aa** (S3)
5. Control experiment (S3)
6. Characterization data of compounds **3** (S4)
7. NMR spectra of compounds **3** (S21)
8. Crystal structure information of compounds **3aa** (S51)
9. Crystal structure information of compounds **3ha** (S53)
10. References (S55)

## 1. General Informations:

The  $^1\text{H}$  and  $^{13}\text{C}$  NMR spectra were recorded on a 400 or 500 MHz spectrometer with chloroform-*d* as a solvent at 20–25 °C. All chemical shift values are quoted in ppm and coupling constants quoted in Hz. High-resolution mass spectra (HRMS) were recorded on FT-ICR MS spectrometer. Melting points are uncorrected. Unless otherwise stated, all commercial reagents were used as received. All solvents were dried and distilled according to standard procedures. Flash column chromatography was performed using silica gel (60 Å pore size, 32–63µm, standard grade). Analytical thin-layer chromatography was performed using glass plates pre-coated with 0.25 mm 230–400 mesh silica gel impregnated with a fluorescent indicator (254 nm). Thin layer chromatography plates were visualized by exposure to ultraviolet light. Organic solutions were concentrated on rotary evaporators at ~20 Torr at 25–35°C. Hydrazonoyl chlorides **1**<sup>1</sup> and sulfonium salts **2**<sup>2</sup> were synthesized according to literature methods, respectively.

## **2. General procedure for the tandem reaction of hydrazoneyl chlorides **1** with sulfonium salts **2****

To a mixture of hydrazoneyl chlorides **1** (0.2 mmol) and sulfonium salts **2** (0.6 mmol) in 1,4-dioxane (3.0 mL) was added trimethylamine (1.0 mmol, 101 mg) at room temperature. The resulting mixture was stirred at room temperature until the starting material **1** was consumed (monitored by TLC, 6h). The mixture was purified by column chromatography on silica gel (ethyl acetate/petroleum ether, 1:10-1:5) to provide the desired products **3**.

## **3. Experimental procedure for the scaled-up synthesis of compound **3ba****

To a mixture of hydrazoneyl chloride **1b** (1.8 mmol, 547 mg) and sulfonium salts **2a** (5.4 mmol, 1.48 g) in 1,4-dioxane (20.0 mL) was added trimethylamine (9.0 mmol, 909 mg) at room temperature. The resulting mixture was stirred at room temperature until the starting material **1b** was consumed. The mixture was purified by column chromatography on silica gel (ethyl acetate/petroleum ether, 1:10-1:5) to provide the desired products **3ba** (690 mg) in 72% yield.

## **4. Experimental procedure for the scaled-up synthesis of compound **3dd****

To the mixture of hydrazoneyl chlorides **1d** (4.4 mmol, 1.0 g), sulfonium bromide **2d** (13.0 mmol, 3.38 g), and triethylamine (22.0 mmol, 2.22 g) was added 1,4-dioxane (50.0 mL). The resulting mixture was stirred at room temperature until the starting material **1d** was consumed. The mixture was purified by column chromatography on silica gel (ethyl acetate/petroleum ether, 1:10-1:5) to provide the desired product **3dd** (1.37g) in 73% yield.

## **5. Control experiment**

To the mixture of hydrazoneyl chlorides **1a** (0.2 mmol, 48.8 mg), sulfur ylide **2a'** (0.6 mmol, 116.4 mg), and triethylamine (0.3 mmol, 30.3 mg) was added 1,4-dioxane (3.0 mL). The resulting mixture was stirred at room temperature until the starting material **1a** was consumed. The mixture was purified by column chromatography on silica gel (ethyl acetate/petroleum ether, 1:10-1:5) to provide the desired product **3aa**

(80 mg) in 85% yield.

## 6. Characterization data for compounds 3

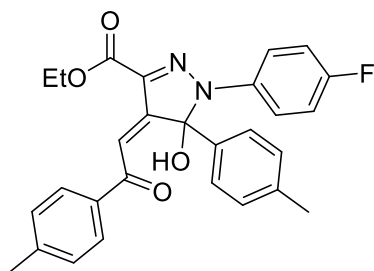

Ethyl (*Z*)-1-(4-fluorophenyl)-5-hydroxy-4-(2-oxo-2-(*p*-tolyl)ethylidene)-5-(*p*-tolyl)-4,5-dihydro-1*H*-pyrazole-3-carboxylate (**3aa**)

It was purified by flash chromatography (EtOAc/petroleum ether, 1:10-1:5) to afford red solid (83 mg, 88% yield); **mp**: 159.2-159.7 °C; **<sup>1</sup>H NMR** (500 MHz, CDCl<sub>3</sub>) δ 8.16 (s, 1H), 8.14 (s, 1H), 7.78 (d, *J* = 7.8 Hz, 2H), 7.48–7.46 (m, 2H), 7.24 (d, *J* = 8.1 Hz, 2H), 7.20 (d, *J* = 7.6 Hz, 2H), 6.97 (d, *J* = 7.6 Hz, 2H), 6.88 (t, *J* = 8.5 Hz, 2H), 4.48–4.46 (m, 2H), 2.38 (s, 3H), 2.18 (s, 3H), 1.48 (t, *J* = 7.0 Hz, 3H). **<sup>13</sup>C NMR** (100 MHz, CDCl<sub>3</sub>) δ 192.67, 162.19, 159.86 (d, *J* = 242.9 Hz), 158.25, 144.97, 138.49, 135.52 (d, *J* = 2.1 Hz), 135.04, 134.78, 132.17, 129.34, 129.07, 128.67, 125.61, 120.02 (d, *J* = 7.9 Hz), 118.16, 115.39 (d, *J* = 22.7 Hz), 98.20, 61.23, 21.73, 21.05, 14.42. **HRMS** (ESI) calcd for C<sub>28</sub>H<sub>25</sub>FN<sub>2</sub>NaO<sub>4</sub> [M + Na]<sup>+</sup> 495.16906, found 495.16807.

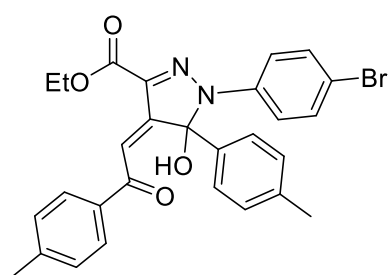

Ethyl (*Z*)-1-(4-bromophenyl)-5-hydroxy-4-(2-oxo-2-(*p*-tolyl)ethylidene)-5-(*p*-tolyl)-4,5-dihydro-1*H*-pyrazole-3-carboxylate (**3ba**)

It was purified by flash chromatography (EtOAc/petroleum ether, 1:10-1:5) to afford yellow solid (82 mg, 77% yield); **mp**: 180.6-181.1 °C; **<sup>1</sup>H NMR** (400 MHz, CDCl<sub>3</sub>) δ 8.18 (s, 1H), 8.14 (s, 1H), 7.78 (d, *J* = 8.1 Hz, 2H), 7.40 (d, *J* = 8.9 Hz, 2H), 7.29 (d, *J* = 9.0 Hz, 2H), 7.23 (d, *J* = 8.2 Hz, 2H), 7.20 (d, *J* = 8.1 Hz, 2H), 6.97 (d, *J* = 8.0 Hz,

2H), 4.50–4.44 (m, 2H), 2.38 (s, 3H), 2.18 (s, 3H), 1.48 (t,  $J = 7.2$  Hz, 3H).  $^{13}\text{C}$  NMR (100 MHz,  $\text{CDCl}_3$ )  $\delta$  192.66, 162.08, 158.02, 145.09, 138.56, 138.20, 134.81, 134.64, 132.67, 131.59, 129.36, 129.13, 129.05, 128.72, 125.60, 119.30, 118.56, 118.51, 117.23, 97.91, 61.37, 21.79, 21.72, 21.02, 14.40. HRMS (ESI) calcd for  $\text{C}_{28}\text{H}_{25}\text{BrN}_2\text{NaO}_4$   $[\text{M} + \text{Na}]^+$  555.08899, found 555.08629.

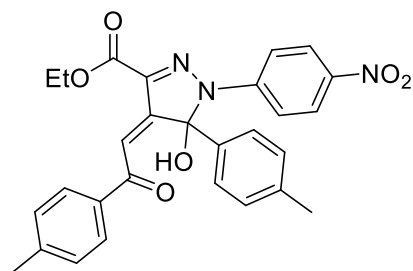

Ethyl (*Z*)-5-hydroxy-1-(4-nitrophenyl)-4-(2-oxo-2-(*p*-tolyl)ethylidene)-5-(*p*-tolyl)-4,5-dihydro-1*H*-pyrazole-3-carboxylate (**3ca**)

It was purified by flash chromatography (EtOAc/petroleum ether, 1:10-1:5) to afford orange solid (50 mg, 50% yield); **mp**: 192.7-193.5 °C;  $^1\text{H}$  NMR (400 MHz,  $\text{CDCl}_3$ )  $\delta$  8.18 (s, 1H), 8.14 (s, 1H), 8.06 (d,  $J = 9.2$  Hz, 2H), 7.77 (d,  $J = 8.0$  Hz, 2H), 7.61 (d,  $J = 9.2$  Hz, 2H), 7.23 (t,  $J = 8.1$  Hz, 4H), 7.00 (d,  $J = 7.9$  Hz, 2H), 4.54–4.46 (m, 2H), 2.39 (s, 3H), 2.19 (s, 3H), 1.51 (t,  $J = 7.1$  Hz, 3H).  $^{13}\text{C}$  NMR (100 MHz,  $\text{CDCl}_3$ )  $\delta$  192.70, 161.65, 156.83, 145.57, 144.03, 142.96, 138.95, 135.37, 134.42, 134.30, 130.05, 129.48, 129.19, 128.91, 125.58, 124.81, 120.49, 116.55, 97.30, 61.81, 21.80, 21.05, 14.35. HRMS (ESI) calcd for  $\text{C}_{28}\text{H}_{25}\text{N}_3\text{NaO}_6$   $[\text{M} + \text{Na}]^+$  522.16356, found 522.16205.

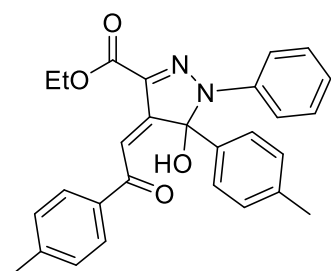

Ethyl (*Z*)-5-hydroxy-4-(2-oxo-2-(*p*-tolyl)ethylidene)-1-phenyl-5-(*p*-tolyl)-4,5-dihydro-1*H*-pyrazole-3-carboxylate (**3da**)

It was purified by flash chromatography (EtOAc/petroleum ether, 1:10-1:5) to afford red solid (86 mg, 94% yield); **mp**: 169.7-170.1 °C;  $^1\text{H}$  NMR (400 MHz,  $\text{CDCl}_3$ )  $\delta$

8.21 (s, 1H), 8.13 (s, 1H), 7.78 (d,  $J = 8.0$  Hz, 2H), 7.52 (d,  $J = 8.1$  Hz, 2H), 7.28–7.26 (m, 2H), 7.19 (t,  $J = 7.8$  Hz, 4H), 7.01–6.99 (m, 1H), 6.96 (d,  $J = 8.1$  Hz, 2H), 4.50–4.44 (m, 2H), 2.38 (s, 3H), 2.17 (s, 3H), 1.48 (t,  $J = 7.1$  Hz, 3H).  $^{13}\text{C}$  NMR (100 MHz,  $\text{CDCl}_3$ )  $\delta$  192.68, 162.26, 158.51, 144.90, 139.15, 138.32, 135.17, 134.78, 132.03, 129.31, 129.05, 128.61, 125.63, 124.39, 118.02, 117.84, 98.14, 61.20, 21.72, 21.02, 14.42. **HRMS** (ESI) calcd for  $\text{C}_{28}\text{H}_{26}\text{N}_2\text{NaO}_4$   $[\text{M} + \text{Na}]^+$  477.17848, found 477.17675.

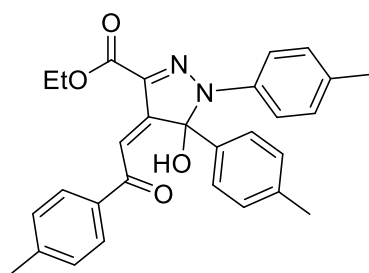

Ethyl (*Z*)-5-hydroxy-4-(2-oxo-2-(*p*-tolyl)ethylidene)-1,5-di-*p*-tolyl-4,5-dihydro-1*H*-pyrazole-3-carboxylate (**3ea**)

It was purified by flash chromatography (EtOAc/petroleum ether, 1:10-1:5) to afford red solid (80 mg, 85% yield); **mp**:164.1-164.9 °C;  $^1\text{H}$  NMR (400 MHz,  $\text{CDCl}_3$ )  $\delta$  8.23 (s, 1H), 8.11 (s, 1H), 7.78 (d,  $J = 8.1$  Hz, 2H), 7.40 (d,  $J = 8.4$  Hz, 2H), 7.27–7.26 (m, 2H), 7.20 (d,  $J = 8.0$  Hz, 2H), 7.00–6.95 (m, 4H), 4.50–4.44 (m, 2H), 2.38 (s, 3H), 2.23 (s, 3H), 2.17 (s, 3H), 1.48 (t,  $J = 7.1$  Hz, 3H).  $^{13}\text{C}$  NMR (100 MHz,  $\text{CDCl}_3$ )  $\delta$  192.65, 162.36, 158.72, 144.80, 138.28, 136.84, 135.25, 134.90, 134.26, 131.48, 129.30, 129.21, 129.05, 128.61, 125.63, 118.20, 117.38, 98.32, 61.14, 21.75, 21.08, 20.86, 14.46. **HRMS** (ESI) calcd for  $\text{C}_{29}\text{H}_{28}\text{N}_2\text{NaO}_4$   $[\text{M} + \text{Na}]^+$  491.19413, found 491.19306.

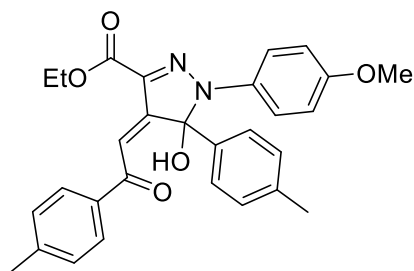

Ethyl (*Z*)-5-hydroxy-1-(4-methoxyphenyl)-4-(2-oxo-2-(*p*-tolyl)ethylidene)-5-(*p*-tolyl)-4,5-dihydro-1*H*-pyrazole-3-carboxylate (**3fa**)

It was purified by flash chromatography (EtOAc/petroleum ether, 1:10-1:5) to afford purplish red solid (80 mg, 83% yield); **mp**: 159.9-160.1 °C; **<sup>1</sup>H NMR** (400 MHz, CDCl<sub>3</sub>) δ 8.22 (s, 1H), 8.12 (s, 1H), 7.78 (d, *J* = 8.1 Hz, 2H), 7.43 (d, *J* = 9.1 Hz, 2H), 7.26 (d, *J* = 7.9 Hz, 2H), 7.20 (d, *J* = 8.0 Hz, 2H), 6.96 (d, *J* = 8.0 Hz, 2H), 6.73 (d, *J* = 9.1 Hz, 2H), 4.50–4.42 (m, 2H), 3.72 (s, 3H), 2.37 (s, 3H), 2.17 (s, 3H), 1.47 (t, *J* = 7.1 Hz, 3H). **<sup>13</sup>C NMR** (100 MHz, CDCl<sub>3</sub>) δ 192.60, 162.37, 158.70, 156.98, 144.75, 138.32, 135.27, 134.94, 132.87, 131.16, 129.29, 129.02, 128.60, 125.59, 120.34, 117.16, 113.82, 98.56, 61.07, 55.33, 21.72, 21.06, 14.46. **HRMS** (ESI) calcd for C<sub>29</sub>H<sub>28</sub>N<sub>2</sub>NaO<sub>5</sub> [M + Na]<sup>+</sup> 507.18904, found 507.18668.

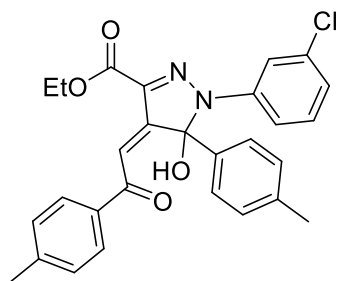

Ethyl (*Z*)-1-(3-chlorophenyl)-5-hydroxy-4-(2-oxo-2-(*p*-tolyl)ethylidene)-5-(*p*-tolyl)-4,5-dihydro-1*H*-pyrazole-3-carboxylate (**3ga**)

It was purified by flash chromatography (EtOAc/petroleum ether, 1:10-1:5) to afford red solid (81 mg, 83% yield); **mp**: 154.5-155.1 °C; **<sup>1</sup>H NMR** (400 MHz, CDCl<sub>3</sub>) δ 8.16 (s, 1H), 8.14 (s, 1H), 7.77 (d, *J* = 8.1 Hz, 2H), 7.58 (s, 1H), 7.37 (d, *J* = 8.2 Hz, 1H), 7.26–7.24 (m, 2H), 7.20 (d, *J* = 8.0 Hz, 2H), 7.08 (t, *J* = 8.1 Hz, 1H), 6.97 (d, *J* = 8.0 Hz, 2H), 6.94 (d, *J* = 8.0 Hz, 1H), 4.48 (q, *J* = 6.9 Hz, 2H), 2.37 (s, 3H), 2.17 (s, 3H), 1.49 (t, *J* = 7.1 Hz, 3H). **<sup>13</sup>C NMR** (100 MHz, CDCl<sub>3</sub>) δ 192.64, 162.03, 157.95, 145.11, 140.15, 138.54, 134.80, 134.61, 134.40, 132.98, 129.59, 129.36, 129.09, 128.71, 125.61, 124.05, 118.78, 117.82, 115.70, 97.83, 61.41, 21.75, 21.04, 14.40. **HRMS** (ESI) calcd for C<sub>28</sub>H<sub>25</sub>CIN<sub>2</sub>NaO<sub>4</sub> [M + Na]<sup>+</sup> 511.13951, found 511.14160.

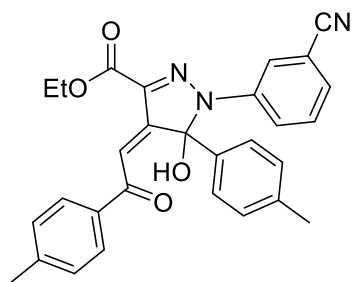

Ethyl (*Z*)-1-(3-cyanophenyl)-5-hydroxy-4-(2-oxo-2-(*p*-tolyl)ethylidene)-5-(*p*-tolyl)-4,5-dihydro-1*H*-pyrazole-3-carboxylate (**3ha**)

It was purified by flash chromatography (EtOAc/petroleum ether, 1:10-1:5) to afford red solid (79 mg, 82% yield); **mp**: 175.9-176.3 °C; **<sup>1</sup>H NMR** (400 MHz, CDCl<sub>3</sub>) δ 8.17 (s, 1H), 8.14 (s, 1H), 7.82 (s, 1H), 7.77 (d, *J* = 7.2 Hz, 2H), 7.72 (d, *J* = 7.5 Hz, 1H), 7.25–7.20 (m, 6H), 6.99 (d, *J* = 7.3 Hz, 2H), 4.52–4.46 (m, 2H), 2.38 (s, 3H), 2.18 (s, 3H), 1.50 (t, *J* = 6.6 Hz, 3H). **<sup>13</sup>C NMR** (100 MHz, CDCl<sub>3</sub>) δ 192.65, 161.82, 157.39, 145.34, 139.73, 138.80, 134.46, 134.44, 133.89, 129.47, 129.42, 129.14, 128.86, 127.01, 125.59, 121.35, 120.56, 119.67, 118.61, 112.66, 97.54, 61.59, 21.77, 21.04, 14.37. **HRMS** (ESI) calcd for C<sub>29</sub>H<sub>25</sub>N<sub>3</sub>NaO<sub>4</sub> [M + Na]<sup>+</sup> 502.17373, found 502.17260.

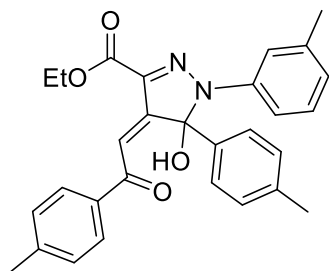

Ethyl (*Z*)-5-hydroxy-4-(2-oxo-2-(*p*-tolyl)ethylidene)-1-(*m*-tolyl)-5-(*p*-tolyl)-4,5-dihydro-1*H*-pyrazole-3-carboxylate (**3ia**)

It was purified by flash chromatography (EtOAc/petroleum ether, 1:10-1:5) to afford red solid (89 mg, 95% yield); **mp**: 169.3-170 °C; **<sup>1</sup>H NMR** (400 MHz, CDCl<sub>3</sub>) δ 8.21 (s, 1H), 8.12 (s, 1H), 7.78 (d, *J* = 8.1 Hz, 2H), 7.38 (s, 1H), 7.31–7.26 (m, 3H), 7.20 (d, *J* = 8.0 Hz, 2H), 7.05 (t, *J* = 7.9 Hz, 1H), 6.96 (d, *J* = 8.0 Hz, 2H), 6.82 (d, *J* = 7.4 Hz, 1H), 4.51–4.45 (m, 2H), 2.38 (s, 3H), 2.26 (s, 3H), 2.17 (s, 3H), 1.49 (t, *J* = 7.1 Hz, 3H). **<sup>13</sup>C NMR** (100 MHz, CDCl<sub>3</sub>) δ 192.62, 162.27, 158.59, 144.82, 139.03, 138.45, 138.23, 135.19, 134.78, 131.79, 129.27, 129.01, 128.55, 128.32, 125.59, 125.36, 118.67, 117.64, 115.21, 98.18, 61.17, 21.67, 21.48, 21.01, 14.41. **HRMS** (ESI) calcd for C<sub>29</sub>H<sub>28</sub>N<sub>2</sub>NaO<sub>4</sub> [M + Na]<sup>+</sup> 491.19413, found 491.19294.



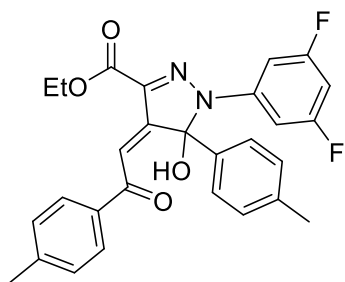

Ethyl (*Z*)-1-(3,5-difluorophenyl)-5-hydroxy-4-(2-oxo-2-(*p*-tolyl)ethylidene)-5-(*p*-tolyl)-4,5-dihydro-1*H*-pyrazole-3-carboxylate (**3ja**)

It was purified by flash chromatography (EtOAc/petroleum ether, 1:10-1:5) to afford red solid (80 mg, 82% yield); **mp**: 185.5-185.7 °C; **<sup>1</sup>H NMR** (400 MHz, CDCl<sub>3</sub>) δ 8.15 (s, 1H), 8.12 (s, 1H), 7.77 (d, *J* = 7.5 Hz, 2H), 7.25–7.19 (m, 4H), 7.06 (d, *J* = 8.1 Hz, 2H), 6.99 (d, *J* = 7.5 Hz, 2H), 6.40 (t, *J* = 8.4 Hz, 1H), 4.47 (q, *J* = 7.0 Hz, 2H), 2.37 (s, 3H), 2.18 (s, 3H), 1.49 (t, *J* = 6.9 Hz, 3H). **<sup>13</sup>C NMR** (100 MHz, CDCl<sub>3</sub>) δ 192.64, 162.95 (dd, *J*<sub>1</sub> = 244.0 Hz, *J*<sub>2</sub> = 14.7 Hz), 161.84, 157.51, 145.30, 141.03 (t, *J* = 13.3 Hz), 138.72, 134.59, 134.47, 133.71, 129.40, 129.13, 128.81, 125.58, 119.51, 100.74 (dd, *J*<sub>1</sub> = 21.0 Hz, *J*<sub>2</sub> = 9.1 Hz), 98.97 (t, *J* = 25.9 Hz), 97.52, 61.55, 21.76, 21.04, 14.35. **HRMS** (ESI) calcd for C<sub>28</sub>H<sub>24</sub>F<sub>2</sub>N<sub>2</sub>NaO<sub>4</sub> [M + Na]<sup>+</sup> 513.15963, found 513.15884.

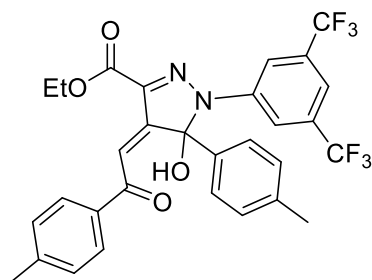

Ethyl (*Z*)-1-(3,5-bis(trifluoromethyl)phenyl)-5-hydroxy-4-(2-oxo-2-(*p*-tolyl)ethylidene)-5-(*p*-tolyl)-4,5-dihydro-1*H*-pyrazole-3-carboxylate (**3ka**)

It was purified by flash chromatography (EtOAc/petroleum ether, 1:10-1:5) to afford red solid (73 mg, 62% yield); **mp**: 157.9-158.4 °C; **<sup>1</sup>H NMR** (400 MHz, CDCl<sub>3</sub>) δ 8.21 (s, 1H), 8.08 (s, 1H), 7.96 (s, 2H), 7.77 (d, *J* = 7.9 Hz, 2H), 7.42 (s, 1H), 7.27–7.25 (m, 2H), 7.21 (d, *J* = 7.9 Hz, 2H), 6.99 (d, *J* = 7.9 Hz, 2H), 4.51 (q, *J* = 7.0 Hz, 2H), 2.38 (s, 3H), 2.17 (s, 3H), 1.51 (t, *J* = 7.1 Hz, 3H). **<sup>13</sup>C NMR** (100 MHz, CDCl<sub>3</sub>) δ 192.56, 161.70, 157.05, 145.46, 140.17, 138.98, 134.71, 134.36, 134.21, 131.85 (q,

$J = 33.5$  Hz), 129.45, 129.17, 128.84, 125.67, 123.09 (q,  $J = 271.2$  Hz), 120.45, 116.89, 116.87, 116.58, 97.41, 61.77, 21.78, 21.02, 14.35. **HRMS** (ESI) calcd for  $C_{30}H_{24}F_6N_2NaO_4$   $[M + Na]^+$  613.15325, found 613.15121.

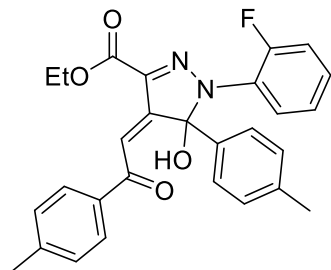

Ethyl (*Z*)-1-(2-fluorophenyl)-5-hydroxy-4-(2-oxo-2-(*p*-tolyl)ethylidene)-5-(*p*-tolyl)-4,5-dihydro-1*H*-pyrazole-3-carboxylate (**31a**)

It was purified by flash chromatography (EtOAc/petroleum ether, 1:10-1:5) to afford yellow solid (40 mg, 42% yield); **mp**: 135.5-136.1 °C; **<sup>1</sup>H NMR** (400 MHz, CDCl<sub>3</sub>)  $\delta$  8.29 (s, 1H), 7.78 (d,  $J = 8.1$  Hz, 2H), 7.46 (s, 1H), 7.39 (t,  $J = 7.2$  Hz, 1H), 7.21 (d,  $J = 8.0$  Hz, 2H), 7.20 (d,  $J = 7.9$  Hz, 2H), 7.18–7.12 (m, 1H), 7.02–6.95 (m, 2H), 6.91 (d,  $J = 8.1$  Hz, 2H), 4.53–4.40 (m, 2H), 2.38 (s, 3H), 2.17 (s, 3H), 1.45 (t,  $J = 7.1$  Hz, 3H). **<sup>13</sup>C NMR** (100 MHz, CDCl<sub>3</sub>)  $\delta$  192.61, 162.13, 157.68 (d,  $J = 253.0$  Hz), 156.95, 144.83, 138.35, 135.39, 134.84, 132.99, 129.30, 129.02, 128.89 (d,  $J = 7.7$  Hz), 128.42, 127.91, 127.07 (d,  $J = 10.3$  Hz), 125.50, 123.59 (d,  $J = 3.7$  Hz), 119.52, 116.44 (d,  $J = 20.2$  Hz), 98.28, 61.21, 21.70, 21.04, 14.43. **HRMS** (ESI) calcd for  $C_{28}H_{25}FN_2NaO_4$   $[M + Na]^+$  495.16906, found 495.16809.

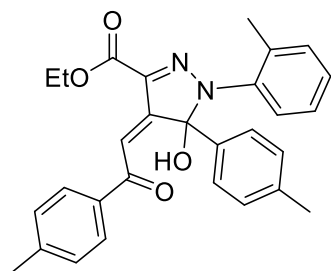

Ethyl (*Z*)-5-hydroxy-4-(2-oxo-2-(*p*-tolyl)ethylidene)-1-(*o*-tolyl)-5-(*p*-tolyl)-4,5-dihydro-1*H*-pyrazole-3-carboxylate (**3ma**)

It was purified by flash chromatography (EtOAc/petroleum ether, 1:10-1:5) to afford yellow solid (70 mg, 75% yield); **mp**: 129.4-130.1 °C; **<sup>1</sup>H NMR** (400 MHz, CDCl<sub>3</sub>)  $\delta$  8.33 (s, 1H), 7.81 (d,  $J = 7.3$  Hz, 2H), 7.45 (s, 1H), 7.21–7.18 (m, 4H), 7.13 (d,  $J =$

6.5 Hz, 2H), 7.07–7.03 (m, 2H), 6.92 (d,  $J = 7.6$  Hz, 2H), 4.46–4.40 (m, 2H), 2.37 (s, 3H), 2.18 (s, 3H), 1.96 (s, 3H), 1.43 (t,  $J = 6.8$  Hz, 3H).  $^{13}\text{C}$  NMR (100 MHz,  $\text{CDCl}_3$ )  $\delta$  192.60, 162.42, 157.19, 144.61, 138.41, 137.48, 136.95, 135.55, 135.07, 130.95, 130.74, 129.25, 128.96, 128.51, 128.36, 128.31, 125.64, 125.57, 118.32, 98.73, 60.90, 21.69, 21.08, 18.14, 14.46. HRMS (ESI) calcd for  $\text{C}_{29}\text{H}_{28}\text{N}_2\text{NaO}_4$   $[\text{M} + \text{Na}]^+$  491.19413, found 491.19289.

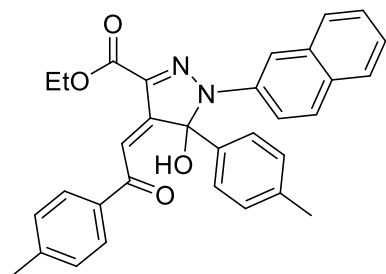

Ethyl (*Z*)-5-hydroxy-1-(naphthalen-2-yl)-4-(2-oxo-2-(*p*-tolyl)ethylidene)-5-(*p*-tolyl)-4,5-dihydro-1*H*-pyrazole-3-carboxylate (**3na**)

It was purified by flash chromatography (EtOAc/petroleum ether, 1:10-1:5) to afford red solid (94 mg, 93% yield); mp: 182.7-183 °C;  $^1\text{H}$  NMR (400 MHz,  $\text{CDCl}_3$ )  $\delta$  8.33 (s, 1H), 8.16 (s, 1H), 7.90 (s, 1H), 7.81–7.79 (m, 3H), 7.72–7.66 (m, 3H), 7.40–7.36 (m, 1H), 7.34–7.32 (m, 3H), 7.21 (d,  $J = 7.8$  Hz, 2H), 6.95 (d,  $J = 7.9$  Hz, 2H), 4.53–4.48 (m, 2H), 2.38 (s, 3H), 2.13 (s, 3H), 1.51 (t,  $J = 7.1$  Hz, 3H).  $^{13}\text{C}$  NMR (100 MHz,  $\text{CDCl}_3$ )  $\delta$  192.66, 162.25, 158.45, 144.93, 138.38, 136.81, 135.13, 134.78, 133.34, 132.29, 130.64, 129.32, 129.07, 128.64, 128.52, 127.86, 127.47, 126.26, 125.64, 124.93, 118.04, 117.94, 114.79, 98.41, 61.29, 21.72, 20.99, 14.45. HRMS (ESI) calcd for  $\text{C}_{32}\text{H}_{28}\text{N}_2\text{NaO}_4$   $[\text{M} + \text{Na}]^+$  527.19413, found 527.19199.

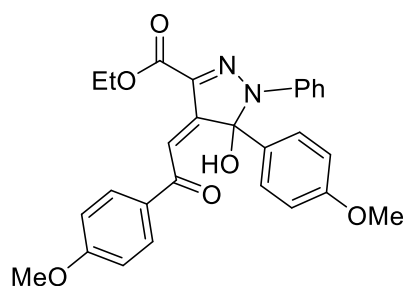

Ethyl (*Z*)-5-hydroxy-5-(4-methoxyphenyl)-4-(2-(4-methoxyphenyl)-2-oxoethylidene)-1-phenyl-4,5-dihydro-1*H*-pyrazole-3-carboxylate (**3db**)

It was purified by flash chromatography (EtOAc/petroleum ether, 1:10-1:5) to afford

red solid (81 mg, 83% yield); **mp**: 167.2-167.4 °C; **<sup>1</sup>H NMR** (400 MHz, CDCl<sub>3</sub>) δ 8.28 (s, 1H), 8.12 (s, 1H), 7.88 (d, *J* = 8.8 Hz, 2H), 7.52 (d, *J* = 8.2 Hz, 2H), 7.31 (d, *J* = 8.7 Hz, 2H), 7.19 (t, *J* = 7.9 Hz, 2H), 7.00 (t, *J* = 7.3 Hz, 1H), 6.87 (d, *J* = 8.8 Hz, 2H), 6.68 (d, *J* = 8.8 Hz, 2H), 4.50–4.44 (m, 2H), 3.84 (s, 3H), 3.66 (s, 3H), 1.48 (t, *J* = 7.1 Hz, 3H). **<sup>13</sup>C NMR** (100 MHz, CDCl<sub>3</sub>) δ 191.47, 164.18, 162.31, 159.39, 158.05, 139.20, 131.99, 131.43, 130.53, 130.32, 128.61, 127.11, 124.35, 118.07, 113.85, 113.18, 97.95, 61.18, 55.54, 55.02, 29.69, 14.44. **HRMS** (ESI) calcd for C<sub>28</sub>H<sub>26</sub>N<sub>2</sub>NaO<sub>6</sub> [M + Na]<sup>+</sup> 509.16831, found 509.16645.

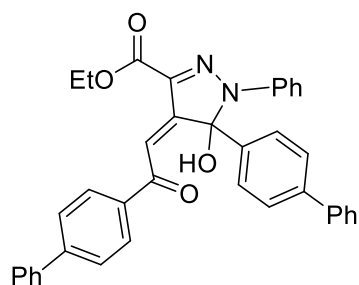

Ethyl (*Z*)-5-([1,1'-biphenyl]-4-yl)-4-(2-([1,1'-biphenyl]-4-yl)-2-oxoethylidene)-5-hydroxy-1-phenyl-4,5-dihydro-1*H*-pyrazole-3-carboxylate (**3dc**)

It was purified by flash chromatography (EtOAc/petroleum ether, 1:10-1:5) to afford red solid (107 mg, 93% yield); **mp**: 154.6-155.2 °C; **<sup>1</sup>H NMR** (400 MHz, CDCl<sub>3</sub>) δ 8.23 (s, 1H), 8.22 (s, 1H), 7.97 (d, *J* = 6.9 Hz, 2H), 7.62 (d, *J* = 7.4 Hz, 2H), 7.57 (d, *J* = 8.1 Hz, 4H), 7.50–7.32 (m, 11H), 7.29–7.27 (m, 1H), 7.24–7.20 (m, 2H), 7.02 (t, *J* = 7.3 Hz, 1H), 4.53–4.48 (m, 2H), 1.51 (td, *J* = 7.1, 1.6 Hz, 3H). **<sup>13</sup>C NMR** (100 MHz, CDCl<sub>3</sub>) δ 192.67, 162.23, 158.52, 146.54, 141.18, 139.95, 139.51, 139.10, 136.96, 135.88, 132.14, 129.53, 128.92, 128.70, 128.63, 128.39, 127.44, 127.24, 126.88, 126.60, 126.22, 124.57, 118.09, 117.99, 98.08, 61.30, 14.44. **HRMS** (ESI) calcd for C<sub>38</sub>H<sub>30</sub>N<sub>2</sub>NaO<sub>4</sub> [M + Na]<sup>+</sup> 601.20978, found 601.20737.

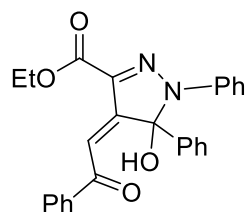

Ethyl (*Z*)-5-hydroxy-4-(2-oxo-2-phenylethylidene)-1,5-diphenyl-4,5-dihydro-1*H*-pyrazole-3-carboxylate (**3dd**)

It was purified by flash chromatography (EtOAc/petroleum ether, 1:10-1:5) to afford red solid (68 mg, 80% yield); **mp**: 167.2-168.2 °C; **<sup>1</sup>H NMR** (400 MHz, CDCl<sub>3</sub>) δ 8.15 (s, 1H), 8.09 (s, 1H), 7.85 (d, *J* = 8.1 Hz, 2H), 7.55–7.50 (m, 3H), 7.41–7.38 (m, 4H), 7.21–7.17 (m, 4H), 7.14–7.10 (m, 1H), 7.00 (t, *J* = 7.3 Hz, 1H), 4.50–4.44 (m, 2H), 1.48 (t, *J* = 7.1 Hz, 3H). **<sup>13</sup>C NMR** (100 MHz, CDCl<sub>3</sub>) δ 193.27, 162.20, 158.71, 139.07, 137.94, 137.14, 133.78, 132.07, 128.82, 128.63, 127.91, 125.76, 124.56, 118.11, 117.96, 98.05, 61.27, 14.42. **HRMS** (ESI) calcd for C<sub>26</sub>H<sub>22</sub>N<sub>2</sub> NaO<sub>4</sub> [M + Na]<sup>+</sup> 449.14718, found 449.14581.

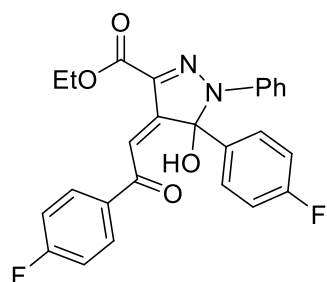

Ethyl (*Z*)-5-(4-fluorophenyl)-4-(2-(4-fluorophenyl)-2-oxoethylidene)-5-hydroxy-1-phenyl-4,5-dihydro-1*H*-pyrazole-3-carboxylate (**3de**)

It was purified by flash chromatography (EtOAc/petroleum ether, 1:10-1:5) to afford red solid (86 mg, 93% yield); **mp**: 142.3-143.5 °C; **<sup>1</sup>H NMR** (400 MHz, CDCl<sub>3</sub>) δ 8.13 (s, 1H), 8.01 (s, 1H), 7.90 (dd, *J* = 8.3, 5.6 Hz, 2H), 7.49 (d, *J* = 8.2 Hz, 2H), 7.37 (dd, *J* = 8.4, 5.2 Hz, 2H), 7.21 (t, *J* = 7.8 Hz, 2H), 7.08 (t, *J* = 8.5 Hz, 2H), 7.03 (t, *J* = 7.4 Hz, 1H), 6.87 (t, *J* = 8.5 Hz, 2H), 4.50–4.45 (m, 2H), 1.48 (t, *J* = 7.1 Hz, 3H). **<sup>13</sup>C NMR** (100 MHz, CDCl<sub>3</sub>) δ 191.59, 166.19 (d, *J* = 257.3 Hz), 162.50 (d, *J* = 248.2 Hz), 162.12, 158.59, 138.91, 133.88 (d, *J* = 2.8 Hz), 133.41 (d, *J* = 2.7 Hz), 131.94, 131.65 (d, *J* = 9.5 Hz), 128.72, 127.70 (d, *J* = 8.4 Hz), 124.82, 118.23, 117.74, 115.91 (d, *J* = 22.0 Hz), 114.96 (d, *J* = 21.9 Hz), 97.61, 61.34, 14.39. **HRMS** (ESI) calcd for C<sub>26</sub>H<sub>20</sub>F<sub>2</sub>N<sub>2</sub>NaO<sub>4</sub> [M + Na]<sup>+</sup> 485.12833, found 485.12656.

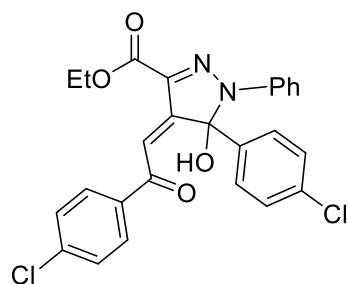

Ethyl (*Z*)-5-(4-chlorophenyl)-4-(2-(4-chlorophenyl)-2-oxoethylidene)-5-hydroxy-1-phenyl-4,5-dihydro-1*H*-pyrazole-3-carboxylate (**3df**)

It was purified by flash chromatography (EtOAc/petroleum ether, 1:10-1:5) to afford red solid (88 mg, 89% yield); **mp**: 174.5-175.2 °C; **<sup>1</sup>H NMR** (400 MHz, CDCl<sub>3</sub>) δ 8.13 (s, 1H), 7.99 (s, 1H), 7.81 (d, *J* = 8.5 Hz, 2H), 7.49 (d, *J* = 8.1 Hz, 2H), 7.39 (d, *J* = 8.4 Hz, 2H), 7.33 (d, *J* = 8.5 Hz, 2H), 7.21 (t, *J* = 7.9 Hz, 2H), 7.16 (d, *J* = 8.6 Hz, 2H), 7.04 (t, *J* = 7.3 Hz, 1H), 4.51–4.43 (m, 2H), 1.48 (t, *J* = 7.1 Hz, 3H). **<sup>13</sup>C NMR** (100 MHz, CDCl<sub>3</sub>) δ 191.87, 162.09, 158.71, 140.65, 138.86, 136.42, 135.31, 134.67, 132.04, 130.29, 129.07, 128.79, 128.25, 127.20, 124.95, 118.24, 117.51, 97.68, 61.41, 14.42. **HRMS** (ESI) calcd for C<sub>26</sub>H<sub>20</sub>Cl<sub>2</sub>N<sub>2</sub>NaO<sub>4</sub> [M + Na]<sup>+</sup> 517.06923, found 517.06746.

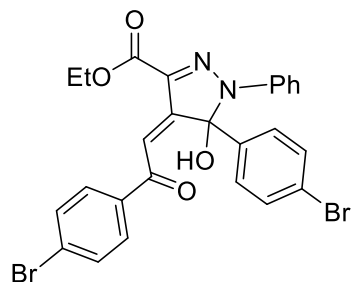

Ethyl (*Z*)-5-(4-bromophenyl)-4-(2-(4-bromophenyl)-2-oxoethylidene)-5-hydroxy-1-phenyl-4,5-dihydro-1*H*-pyrazole-3-carboxylate (**3dg**)

It was purified by flash chromatography (EtOAc/petroleum ether, 1:10-1:5) to afford red solid (84 mg, 72% yield); **mp**: 190.8-191.3 °C; **<sup>1</sup>H NMR** (400 MHz, CDCl<sub>3</sub>) δ 8.12 (s, 1H), 7.99 (s, 1H), 7.73 (d, *J* = 8.1 Hz, 2H), 7.55 (d, *J* = 8.2 Hz, 2H), 7.49 (d, *J* = 8.2 Hz, 2H), 7.32–7.30 (m, 2H), 7.27–7.26 (m, 2H), 7.21 (t, *J* = 7.7 Hz, 2H), 7.04 (t, *J* = 7.2 Hz, 1H), 4.49–4.45 (m, 2H), 1.48 (t, *J* = 7.1 Hz, 3H). **<sup>13</sup>C NMR** (100 MHz, CDCl<sub>3</sub>) δ 192.03, 162.04, 158.68, 138.81, 136.88, 135.69, 132.05, 131.17, 130.33, 129.50, 128.78, 127.45, 124.95, 122.99, 118.20, 117.40, 97.71, 61.39, 14.40. **HRMS** (ESI) calcd for C<sub>26</sub>H<sub>20</sub>Br<sub>2</sub>N<sub>2</sub>NaO<sub>4</sub> [M + Na]<sup>+</sup> 604.96820, found 604.96656.

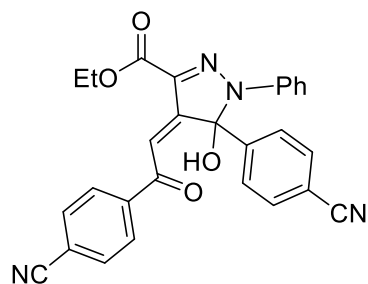

Ethyl (*Z*)-5-(4-cyanophenyl)-4-(2-(4-cyanophenyl)-2-oxoethylidene)-5-hydroxy-1-phenyl-4,5-dihydro-1*H*-pyrazole-3-carboxylate (**3dh**)

It was purified by flash chromatography (EtOAc/petroleum ether, 1:10-1:5) to afford red solid (82 mg, 86% yield); **mp**: 177.1-177.8 °C; **<sup>1</sup>H NMR** (400 MHz, CDCl<sub>3</sub>) δ 8.19 (s, 1H), 7.95 (d, *J* = 8.3 Hz, 2H), 7.80 (s, 1H), 7.73 (d, *J* = 8.3 Hz, 2H), 7.54–7.49 (m, 4H), 7.46 (d, *J* = 8.0 Hz, 2H), 7.22 (t, *J* = 7.9 Hz, 2H), 7.07 (t, *J* = 7.3 Hz, 1H), 4.51–4.46 (m, 2H), 1.49 (t, *J* = 7.1 Hz, 3H). **<sup>13</sup>C NMR** (100 MHz, CDCl<sub>3</sub>) δ 191.56, 161.81, 159.24, 142.16, 139.71, 138.53, 132.56, 132.21, 131.93, 129.15, 128.93, 126.51, 125.51, 118.38, 117.93, 117.57, 117.16, 116.97, 112.91, 97.57, 61.60, 14.36. **HRMS** (ESI) calcd for C<sub>28</sub>H<sub>20</sub>N<sub>4</sub>NaO<sub>4</sub> [M + Na]<sup>+</sup> 499.13768, found 499.13580.

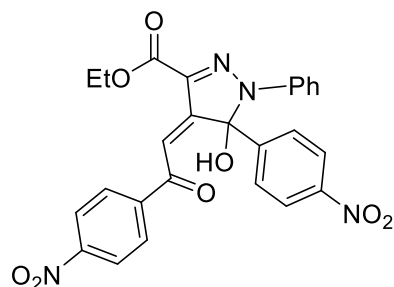

Ethyl (*Z*)-5-hydroxy-5-(4-nitrophenyl)-4-(2-(4-nitrophenyl)-2-oxoethylidene)-1-phenyl-4,5-dihydro-1*H*-pyrazole-3-carboxylate (**3di**)

It was purified by flash chromatography (EtOAc/petroleum ether, 1:10-1:5) to afford red solid (101 mg, 98% yield); **mp**: 177.0-177.9 °C; **<sup>1</sup>H NMR** (400 MHz, CDCl<sub>3</sub>) δ 8.26 (d, *J* = 8.7 Hz, 2H), 8.24 (s, 1H), 8.07 (d, *J* = 8.6 Hz, 2H), 8.02 (d, *J* = 8.6 Hz, 2H), 7.80 (s, 1H), 7.60 (d, *J* = 8.6 Hz, 2H), 7.48 (d, *J* = 8.0 Hz, 2H), 7.23 (t, *J* = 8.0 Hz, 2H), 7.07 (t, *J* = 7.3 Hz, 1H), 4.55–4.44 (m, 2H), 1.50 (t, *J* = 7.1 Hz, 3H). **<sup>13</sup>C NMR** (100 MHz, CDCl<sub>3</sub>) δ 191.40, 161.83, 159.43, 150.74, 148.02, 143.93, 141.19, 138.57, 132.33, 129.89, 129.01, 126.90, 125.70, 123.97, 123.37, 118.55, 117.08,

97.61, 61.68, 14.39. **HRMS** (ESI) calcd for C<sub>26</sub>H<sub>20</sub>N<sub>4</sub>NaO<sub>8</sub> [M + Na]<sup>+</sup> 539.11733, found 539.11533.

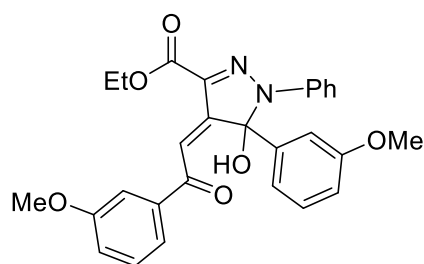

Ethyl (*Z*)-5-hydroxy-5-(3-methoxyphenyl)-4-(2-(3-methoxyphenyl)-2-oxoethylidene)-1-phenyl-4,5-dihydro-1*H*-pyrazole-3-carboxylate (**3dj**)

It was purified by flash chromatography (EtOAc/petroleum ether, 1:10-1:5) to afford red solid (92 mg, 95% yield); **mp**: 171.2-172.1 °C; **<sup>1</sup>H NMR** (400 MHz, CDCl<sub>3</sub>) δ 8.13 (s, 1H), 8.08 (s, 1H), 7.52 (d, *J* = 8.2 Hz, 2H), 7.47 (d, *J* = 7.6 Hz, 1H), 7.37 (s, 1H), 7.31 (t, *J* = 7.9 Hz, 1H), 7.20 (t, *J* = 7.9 Hz, 2H), 7.12–7.08 (m, 2H), 7.02 (t, *J* = 7.4 Hz, 1H), 6.97–6.95 (m, 2H), 6.67 (d, *J* = 7.4 Hz, 1H), 4.49–4.44 (m, 2H), 3.83 (s, 3H), 3.70 (s, 3H), 1.48 (t, *J* = 7.1 Hz, 3H). **<sup>13</sup>C NMR** (100 MHz, CDCl<sub>3</sub>) δ 193.02, 162.12, 159.76, 159.07, 158.28, 139.55, 139.10, 138.49, 132.10, 129.61, 128.98, 128.64, 124.60, 121.75, 120.45, 118.25, 118.18, 113.76, 112.70, 112.10, 97.88, 61.25, 55.41, 55.24, 14.42. **HRMS** (ESI) calcd for C<sub>28</sub>H<sub>26</sub>N<sub>2</sub>NaO<sub>6</sub> [M + Na]<sup>+</sup> 509.16831, found 509.16685.

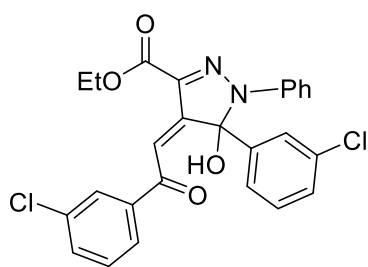

Ethyl (*Z*)-5-(3-chlorophenyl)-4-(2-(3-chlorophenyl)-2-oxoethylidene)-5-hydroxy-1-phenyl-4,5-dihydro-1*H*-pyrazole-3-carboxylate (**3dk**)

It was purified by flash chromatography (EtOAc/petroleum ether, 1:10-1:5) to afford red solid (93 mg, 94% yield); **mp**: 169.8-170.4 °C; **<sup>1</sup>H NMR** (400 MHz, CDCl<sub>3</sub>) δ 8.12 (s, 1H), 7.92 (s, 1H), 7.84 (s, 1H), 7.76 (d, *J* = 7.8 Hz, 1H), 7.53–7.49 (m, 3H), 7.39–7.32 (m, 3H), 7.22 (t, *J* = 8.0 Hz, 2H), 7.17–7.13 (m, 2H), 7.05 (t, *J* = 7.3 Hz,



1H), 4.51–4.46 (m, 2H), 1.49 (t,  $J = 7.1$  Hz, 3H).  $^{13}\text{C}$  NMR (100 MHz,  $\text{CDCl}_3$ )  $\delta$  191.88, 162.00, 158.75, 139.68, 138.78, 138.45, 135.09, 134.18, 133.86, 132.07, 130.01, 129.24, 129.11, 128.79, 127.03, 125.90, 125.02, 124.06, 118.29, 117.52, 97.48, 61.45, 14.40. HRMS (ESI) calcd for  $\text{C}_{26}\text{H}_{20}\text{Cl}_2\text{N}_2\text{NaO}_4$   $[\text{M} + \text{Na}]^+$  517.06923, found 517.06742.

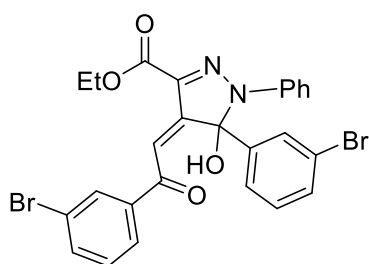

Ethyl (*Z*)-5-(3-bromophenyl)-4-(2-(3-bromophenyl)-2-oxoethylidene)-5-hydroxy-1-phenyl-4,5-dihydro-1*H*-pyrazole-3-carboxylate (**3dl**)

It was purified by flash chromatography (EtOAc/petroleum ether, 1:10-1:5) to afford red solid (94 mg, 81% yield); **mp**: 149.4-149.7 °C;  $^1\text{H}$  NMR (400 MHz,  $\text{CDCl}_3$ )  $\delta$  8.12 (s, 1H), 8.00 (s, 1H), 7.90 (s, 1H), 7.81 (d,  $J = 7.7$  Hz, 1H), 7.68 (d,  $J = 7.5$  Hz, 1H), 7.49 (d,  $J = 7.8$  Hz, 3H), 7.38 (d,  $J = 7.8$  Hz, 1H), 7.33–7.29 (m, 2H), 7.23 (t,  $J = 7.9$  Hz, 2H), 7.11–7.03 (m, 2H), 4.52–4.46 (m, 2H), 1.50 (t,  $J = 7.1$  Hz, 3H).  $^{13}\text{C}$  NMR (100 MHz,  $\text{CDCl}_3$ )  $\delta$  191.74, 161.95, 158.67, 139.85, 138.72, 138.59, 136.73, 132.00, 131.64, 130.20, 129.49, 128.77, 128.69, 127.45, 124.99, 124.49, 123.04, 122.29, 118.24, 117.48, 97.36, 61.43, 14.38. HRMS (ESI) calcd for  $\text{C}_{26}\text{H}_{20}\text{Br}_2\text{N}_2\text{NaO}_4$   $[\text{M} + \text{Na}]^+$  604.96820, found 604.96569.

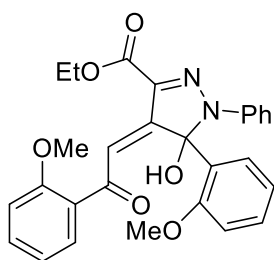

Ethyl (*Z*)-5-hydroxy-5-(2-methoxyphenyl)-4-(2-(2-methoxyphenyl)-2-oxoethylidene)-1-phenyl-4,5-dihydro-1*H*-pyrazole-3-carboxylate (**3dm**)

It was purified by flash chromatography (EtOAc/petroleum ether, 1:10-1:5) to afford red solid (82 mg, 84% yield); **mp**: 165.3-165.9 °C;  $^1\text{H}$  NMR (400 MHz,  $\text{CDCl}_3$ )  $\delta$

8.01 (d,  $J = 7.7$  Hz, 1H), 7.86 (d,  $J = 1.1$  Hz, 1H), 7.46 (d,  $J = 8.4$  Hz, 2H), 7.42–7.37 (m, 1H), 7.32 (d,  $J = 7.6$  Hz, 1H), 7.28 (d,  $J = 1.4$  Hz, 1H), 7.16–7.10 (m, 3H), 6.96–6.91 (m, 2H), 6.90–6.85 (m, 2H), 6.63 (d,  $J = 8.1$  Hz, 1H), 4.52–4.38 (m, 2H), 3.82 (s, 3H), 3.59 (s, 3H), 1.44 (t,  $J = 7.1$  Hz, 3H).  $^{13}\text{C}$  NMR (100 MHz,  $\text{CDCl}_3$ )  $\delta$  194.43, 162.39, 158.70, 156.33, 156.25, 139.74, 134.13, 133.59, 130.50, 129.97, 129.89, 128.28, 128.01, 126.04, 123.75, 122.24, 120.56, 119.22, 118.21, 111.77, 111.70, 94.96, 60.78, 55.77, 55.54, 14.45. **HRMS** (ESI) calcd for  $\text{C}_{28}\text{H}_{26}\text{N}_2\text{NaO}_6$  [ $\text{M} + \text{Na}$ ] $^+$  509.16831, found 509.16826.

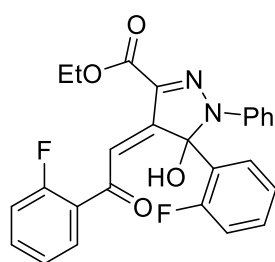

Ethyl (*Z*)-5-(2-fluorophenyl)-4-(2-(2-fluorophenyl)-2-oxoethylidene)-5-hydroxy-1-phenyl-4,5-dihydro-1*H*-pyrazole-3-carboxylate (**3dn**)

It was purified by flash chromatography (EtOAc/petroleum ether, 1:10-1:5) to afford red solid (89 mg, 96% yield); **mp**: 141.3-142.2 °C;  $^1\text{H}$  NMR (400 MHz,  $\text{CDCl}_3$ )  $\delta$  8.02–7.99 (m, 2H), 7.58 (t,  $J = 7.6$  Hz, 1H), 7.50–7.45 (m, 3H), 7.32 (s, 1H), 7.20–7.04 (m, 6H), 6.99 (t,  $J = 7.3$  Hz, 1H), 6.81–6.77 (m, 1H), 4.50–4.41 (m, 2H), 1.45 (t,  $J = 7.1$  Hz, 3H).  $^{13}\text{C}$  NMR (100 MHz,  $\text{CDCl}_3$ )  $\delta$  191.11, 161.97, 161.60 (d,  $J = 239.2$  Hz), 159.08 (d,  $J = 233.1$  Hz), 157.04, 139.21, 135.31 (d,  $J = 8.9$  Hz), 133.00, 130.84, 130.79, 130.03, 128.54, 125.80 (d,  $J = 11.3$  Hz), 124.65, 124.50, 124.38 (d,  $J = 3.2$  Hz), 122.61 (d,  $J = 2.8$  Hz), 121.61 (d,  $J = 6.9$  Hz), 118.31, 116.73 (d,  $J = 23.1$  Hz), 115.90 (d,  $J = 21.3$  Hz), 94.32, 61.23, 14.31. **HRMS** (ESI) calcd for  $\text{C}_{26}\text{H}_{20}\text{F}_2\text{N}_2\text{NaO}_4$  [ $\text{M} + \text{Na}$ ] $^+$  485.12833, found 485.12837.

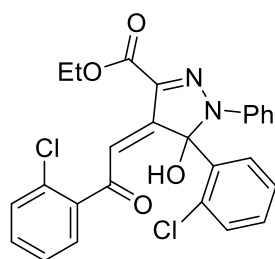

Ethyl (*Z*)-5-(2-chlorophenyl)-4-(2-(2-chlorophenyl)-2-oxoethylidene)-5-hydroxy-1-phenyl-4,5-dihydro-1*H*-pyrazole-3-carboxylate (**3do**)

It was purified by flash chromatography (EtOAc/petroleum ether, 1:10-1:5) to afford red solid (30 mg, 30% yield); **mp**: 153.4-154.1 °C; **<sup>1</sup>H NMR** (400 MHz, CDCl<sub>3</sub>) δ 8.22 (d, *J* = 7.9 Hz, 1H), 7.77 (s, 1H), 7.44 (d, *J* = 7.9 Hz, 2H), 7.38–7.28 (m, 4H), 7.24–7.23 (m, 1H), 7.19–7.16 (m, 4H), 7.01 (t, *J* = 7.3 Hz, 1H), 6.74 (s, 1H), 4.52–4.36 (m, 2H), 1.44 (t, *J* = 7.1 Hz, 3H). **<sup>13</sup>C NMR** (100 MHz, CDCl<sub>3</sub>) δ 194.71, 162.12, 155.54, 139.31, 137.46, 133.99, 133.46, 132.90, 132.36, 132.16, 131.37, 130.65, 130.46, 130.22, 130.18, 128.48, 126.84, 125.29, 124.67, 122.32, 118.86, 94.97, 61.21, 14.36. **HRMS** (ESI) calcd for C<sub>26</sub>H<sub>20</sub>Cl<sub>2</sub>N<sub>2</sub>NaO<sub>4</sub> [M + Na]<sup>+</sup> 517.06923, found 517.06889.

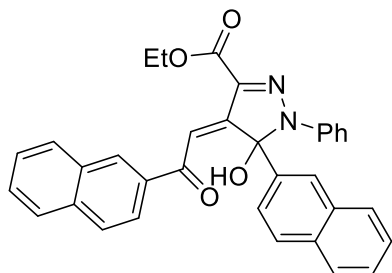

Ethyl (*Z*)-5-hydroxy-5-(naphthalen-2-yl)-4-(2-(naphthalen-2-yl)-2-oxoethylidene)-1-phenyl-4,5-dihydro-1*H*-pyrazole-3-carboxylate (**3dp**)

It was purified by flash chromatography (EtOAc/petroleum ether, 1:10-1:5) to afford yellow solid (89 mg, 85% yield); **mp**: 174.6-175.3 °C; **<sup>1</sup>H NMR** (400 MHz, CDCl<sub>3</sub>) δ 8.43 (s, 1H), 8.36 (s, 1H), 8.35 (s, 1H), 8.07 (s, 1H), 7.89–7.84 (m, 2H), 7.83 (d, *J* = 8.2 Hz, 1H), 7.77 (t, *J* = 7.8 Hz, 2H), 7.65–7.62 (m, 2H), 7.58–7.53 (m, 3H), 7.49 (t, *J* = 7.0 Hz, 1H), 7.42–7.34 (m, 3H), 7.18–7.14 (m, 2H), 6.96 (t, *J* = 7.3 Hz, 1H), 4.58–4.49 (m, 2H), 1.54 (t, *J* = 7.2 Hz, 3H). **<sup>13</sup>C NMR** (100 MHz, CDCl<sub>3</sub>) δ 192.93, 162.31, 158.51, 139.08, 135.69, 135.27, 134.41, 133.04, 132.26, 132.23, 132.14, 131.12, 129.69, 128.91, 128.66, 128.49, 128.12, 127.63, 127.37, 126.81, 126.47, 126.24, 125.58, 124.55, 123.91, 122.94, 118.17, 118.04, 98.28, 61.34, 14.44. **HRMS** (ESI) calcd for C<sub>34</sub>H<sub>26</sub>N<sub>2</sub>NaO<sub>4</sub> [M + Na]<sup>+</sup> 549.17848, found 549.17747.

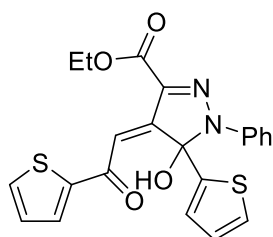

Ethyl (*Z*)-5-hydroxy-4-(2-oxo-2-(thiophen-2-yl)ethylidene)-1-phenyl-5-(thiophen-2-yl)-4,5-dihydro-1*H*-pyrazole-3-carboxylate (**3dq**)

It was purified by flash chromatography (EtOAc/petroleum ether, 1:10-1:5) to afford red solid (49 mg, 56% yield); **mp**: 156.7-157.5 °C; **<sup>1</sup>H NMR** (400 MHz, CDCl<sub>3</sub>) δ 8.42 (s, 1H), 8.12 (s, 1H), 7.84 (d, *J* = 3.5 Hz, 1H), 7.70 (d, *J* = 4.8 Hz, 1H), 7.62 (d, *J* = 8.0 Hz, 2H), 7.28–7.24 (m, 2H), 7.15–7.13 (m, 1H), 7.11–7.07 (m, 2H), 7.04 (d, *J* = 2.8 Hz, 1H), 6.78–6.76 (m, 1H), 4.53–4.41 (m, 2H), 1.48 (t, *J* = 7.1 Hz, 3H). **<sup>13</sup>C NMR** (100 MHz, CDCl<sub>3</sub>) δ 184.85, 162.03, 156.96, 144.89, 141.85, 139.09, 135.98, 134.01, 131.96, 128.67, 128.62, 126.42, 126.30, 126.18, 125.18, 119.28, 118.08, 96.74, 61.31, 14.41. **HRMS** (ESI) calcd for C<sub>22</sub>H<sub>18</sub>N<sub>2</sub>NaO<sub>4</sub>S<sub>2</sub> [M + Na]<sup>+</sup> 461.06002, found 461.05873.

## 7. NMR spectra of compounds 3

### $^1\text{H}$ NMR and $^{13}\text{C}$ NMR spectrums of **3aa**

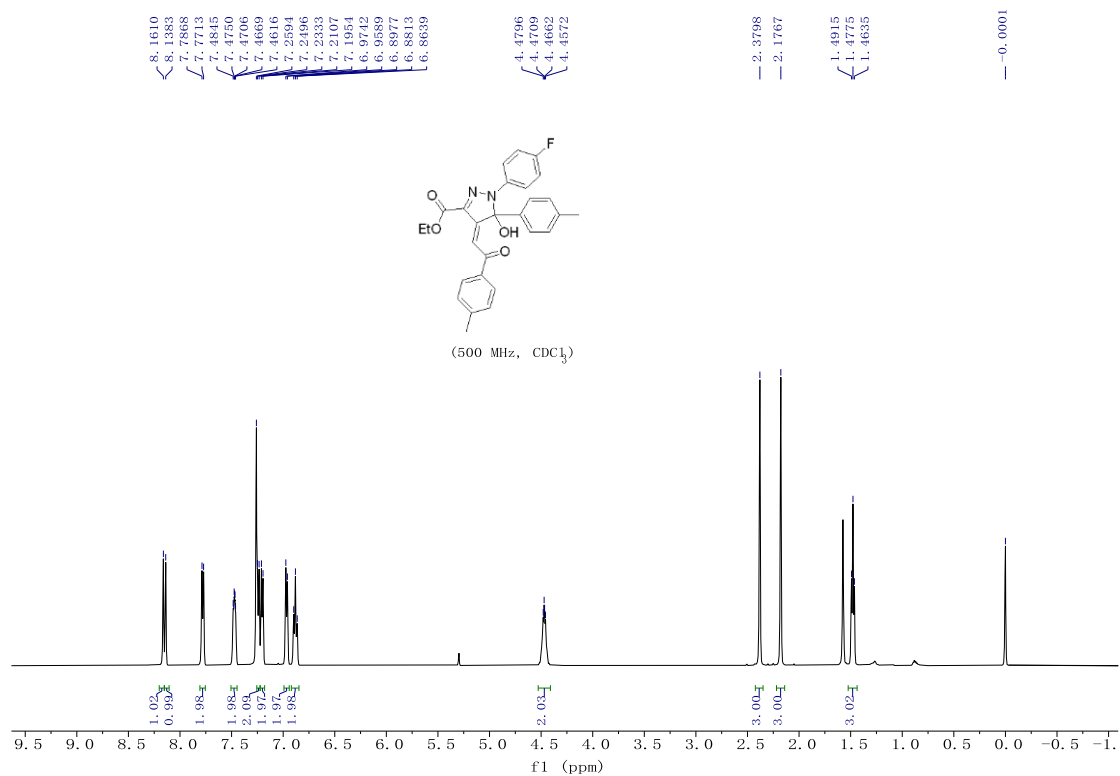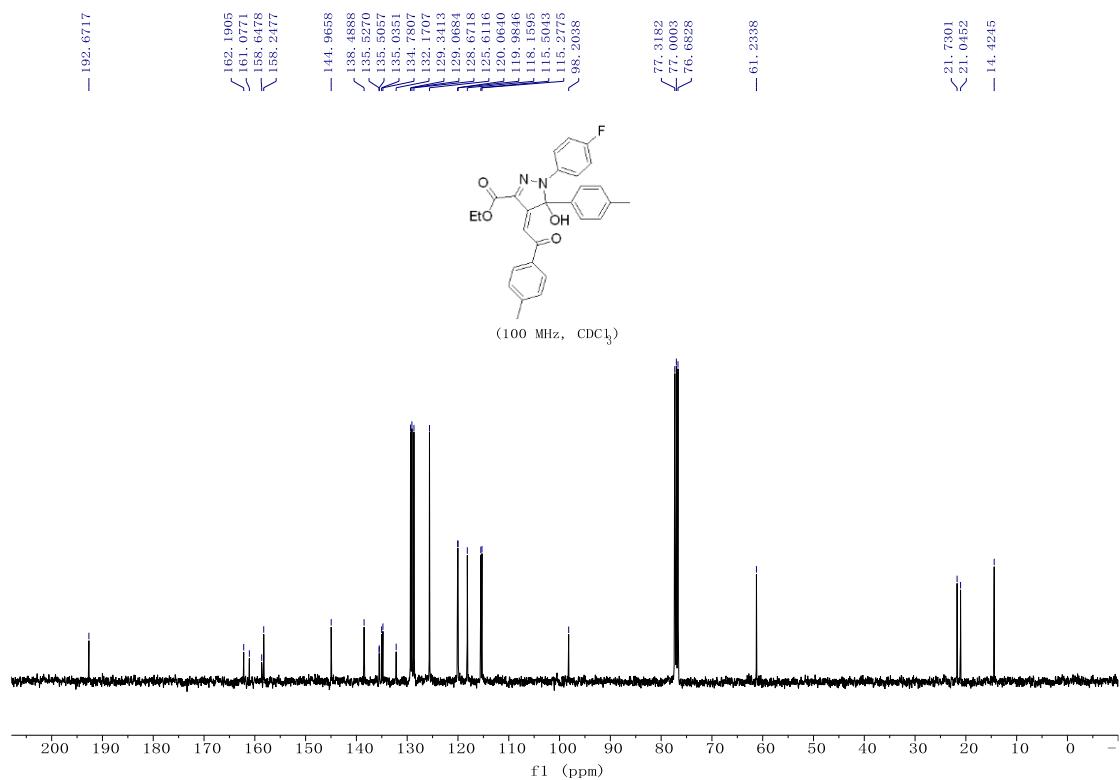

<sup>1</sup>H NMR and <sup>13</sup>C NMR spectrums of **3ba**

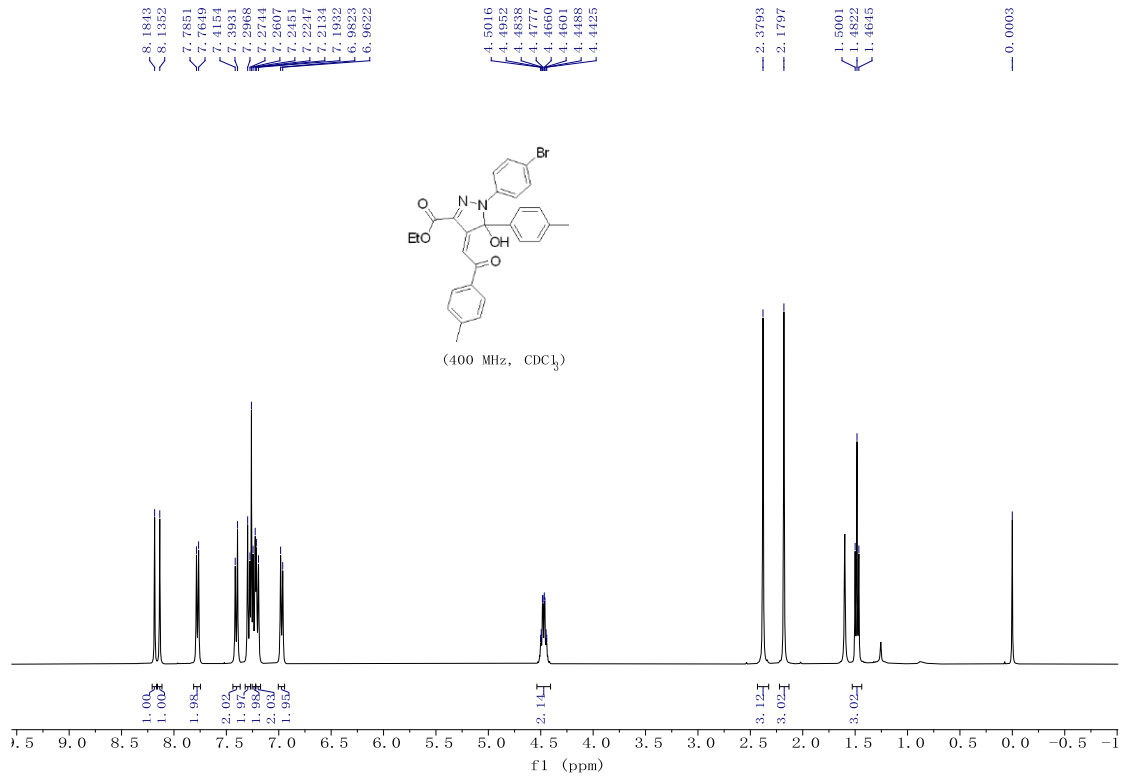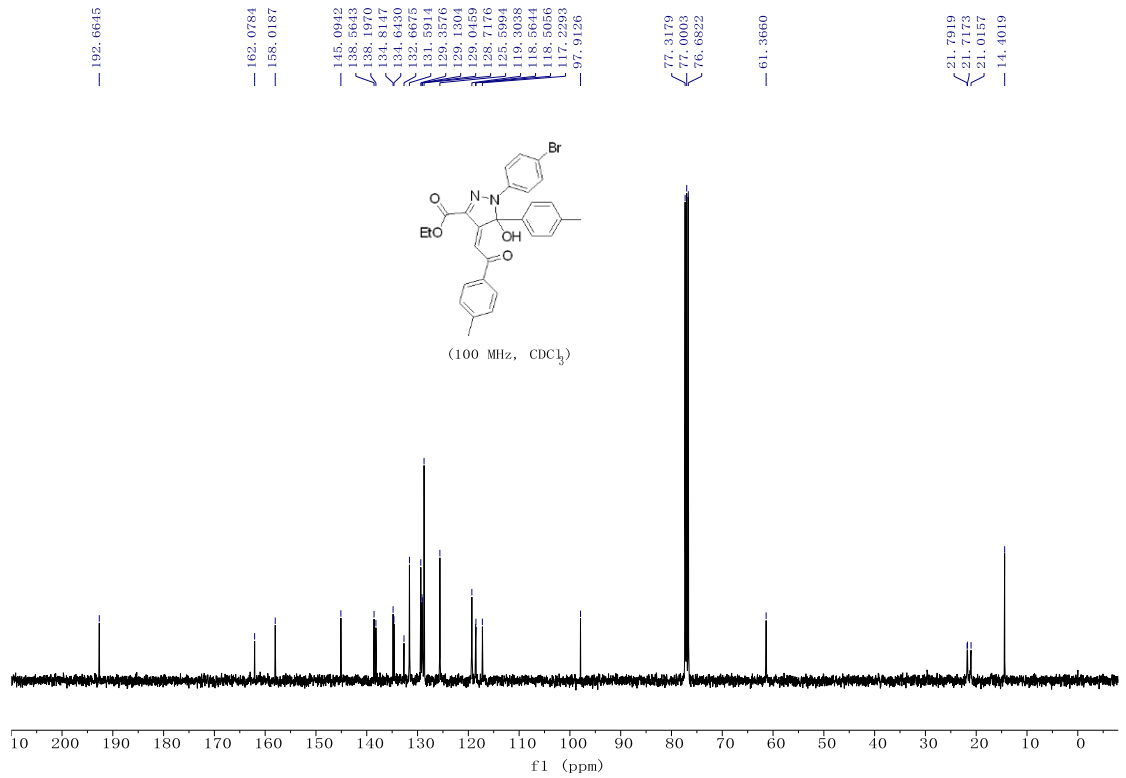

<sup>1</sup>H NMR and <sup>13</sup>C NMR spectrums of **3ca**

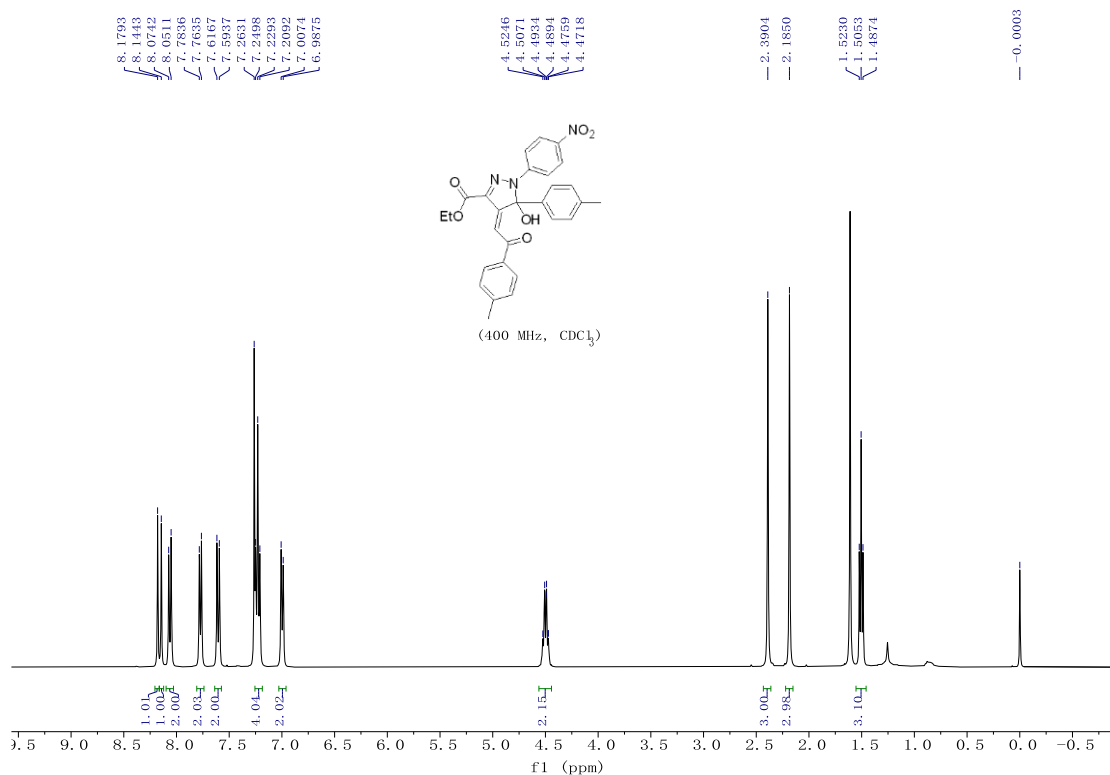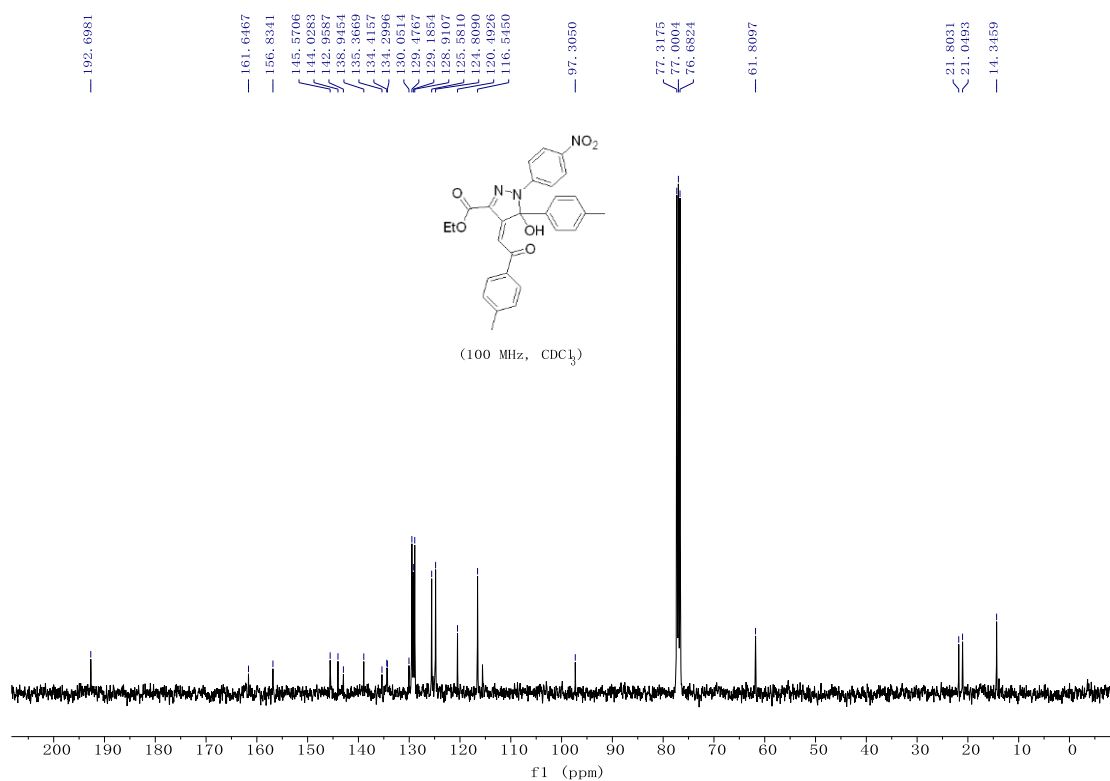

# <sup>1</sup>H NMR and <sup>13</sup>C NMR spectrums of **3da**

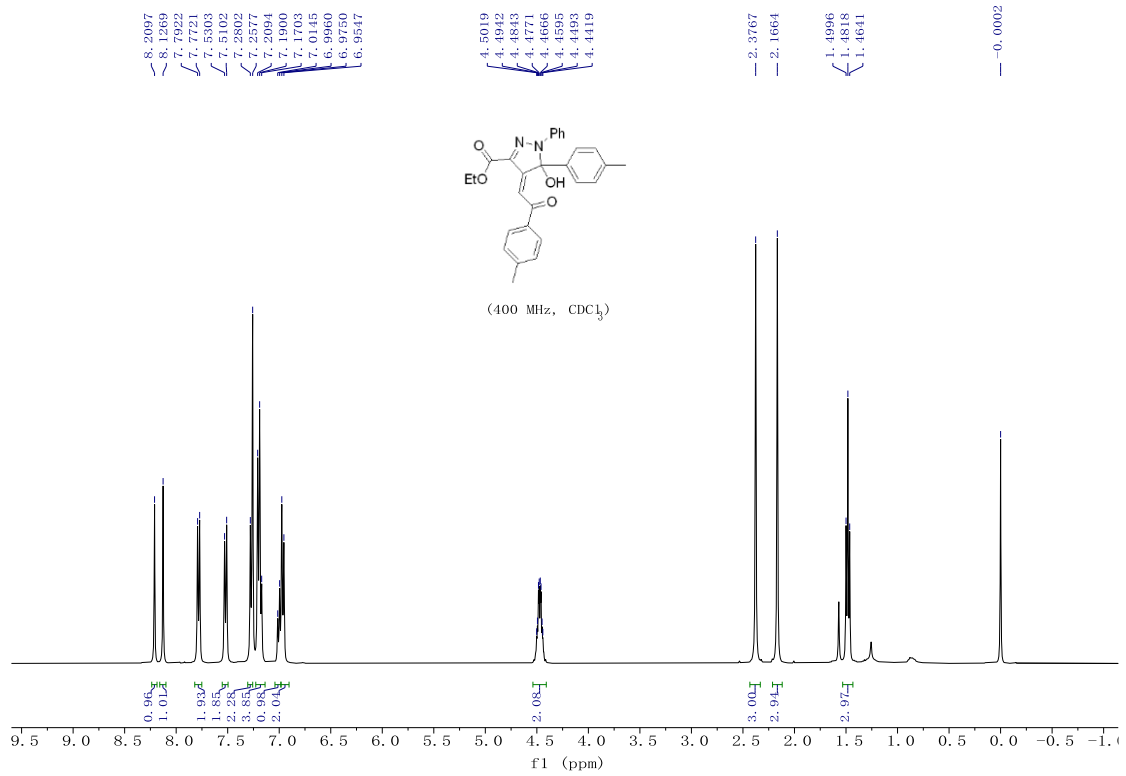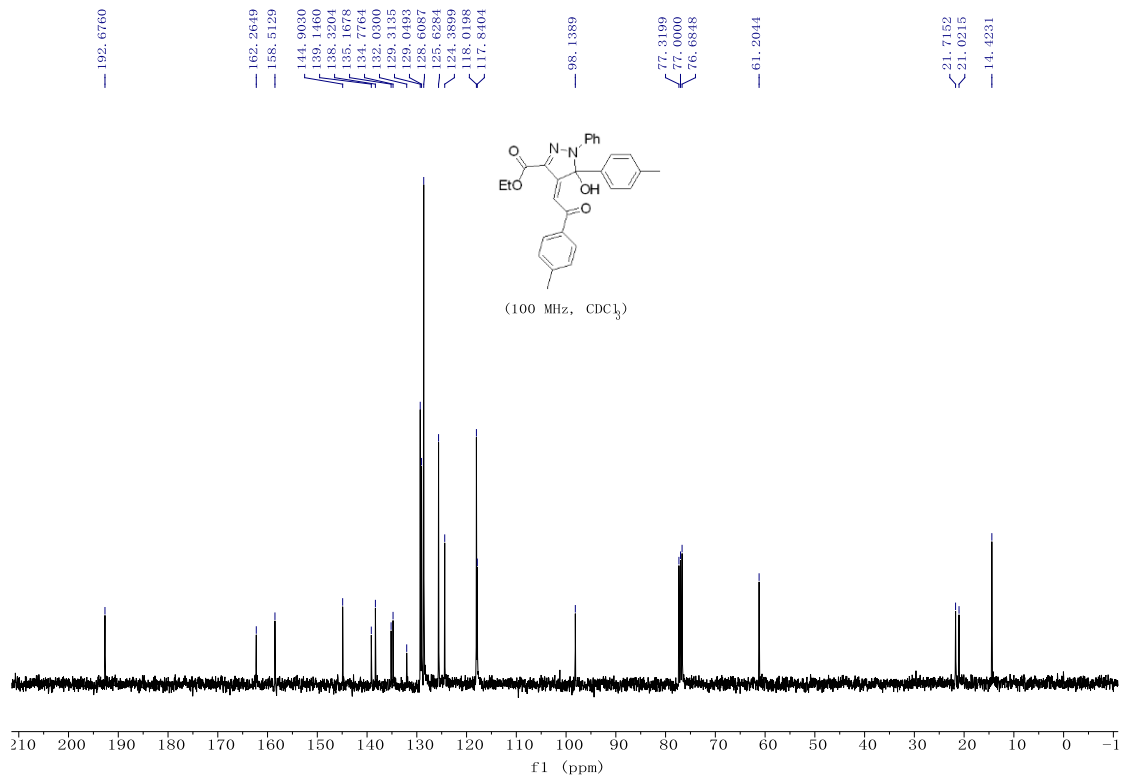



<sup>1</sup>H NMR and <sup>13</sup>C NMR spectrums of **3ea**

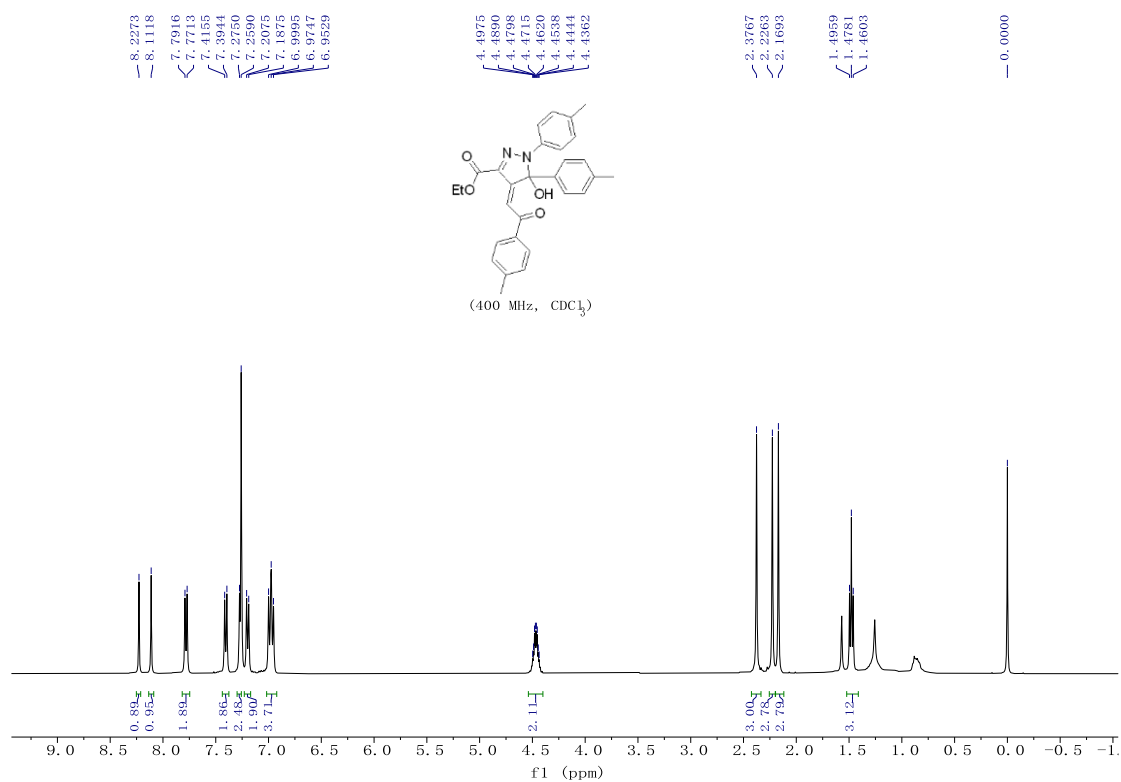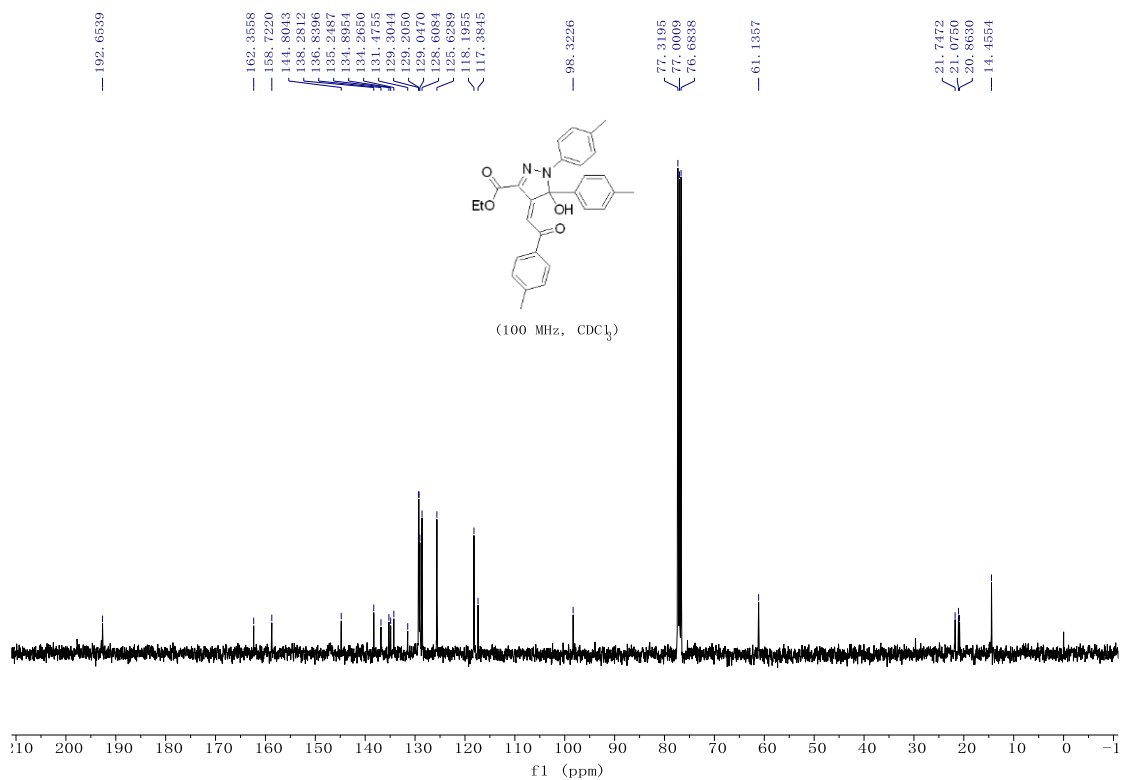

<sup>1</sup>H NMR and <sup>13</sup>C NMR spectra of **3fa**

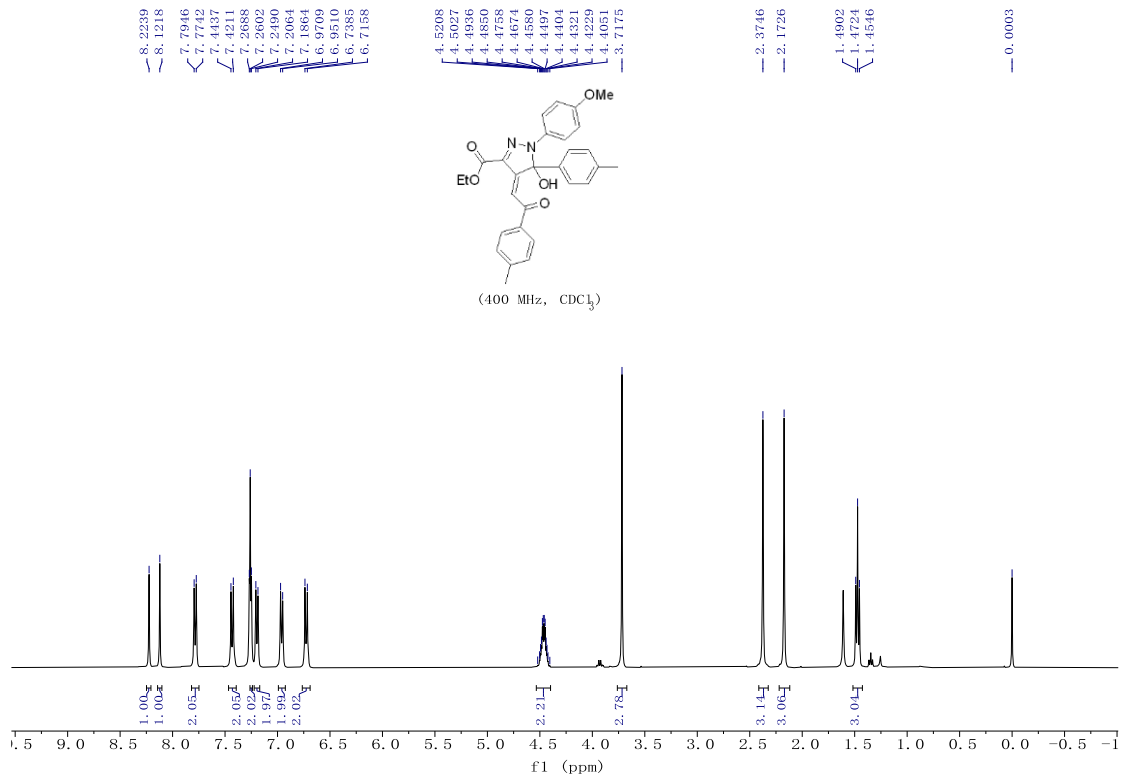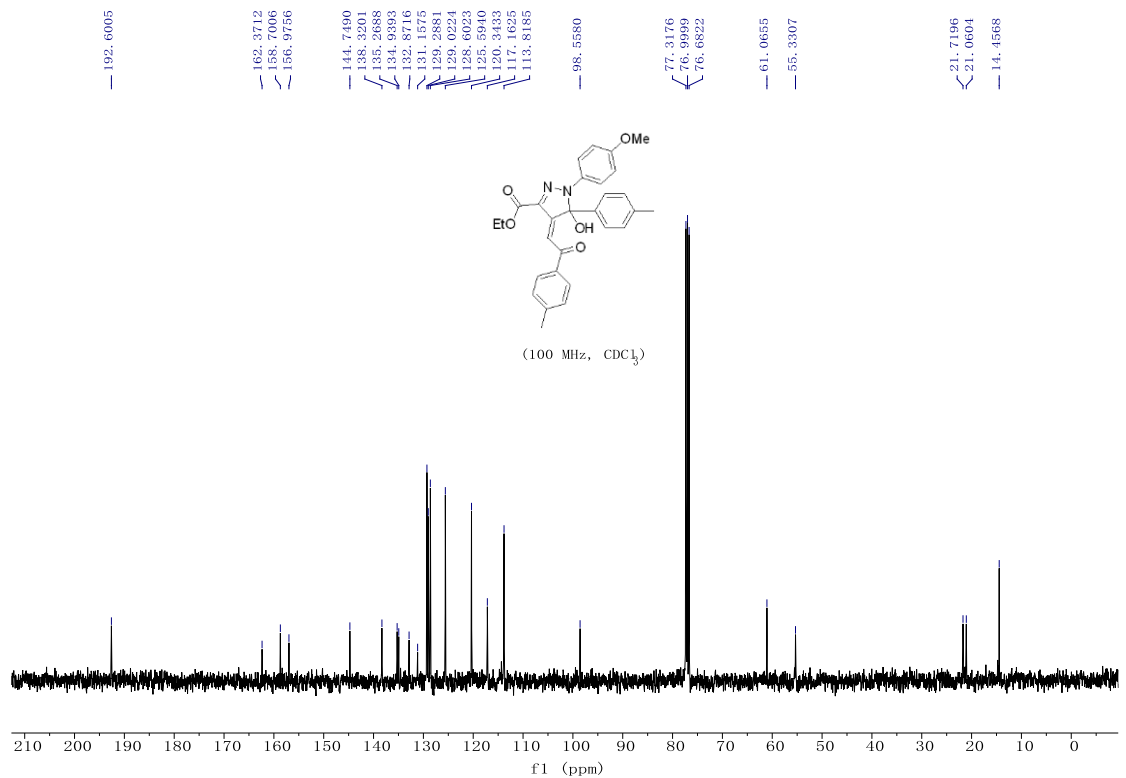

<sup>1</sup>H NMR and <sup>13</sup>C NMR spectrums of **3ga**

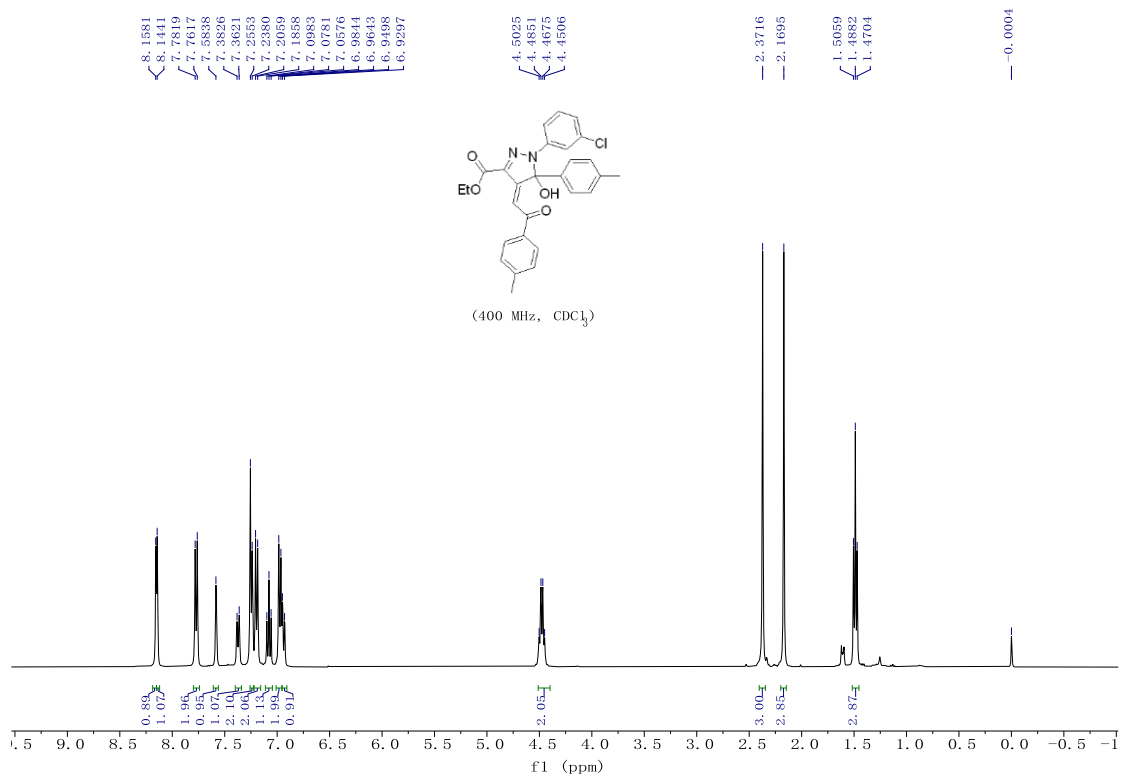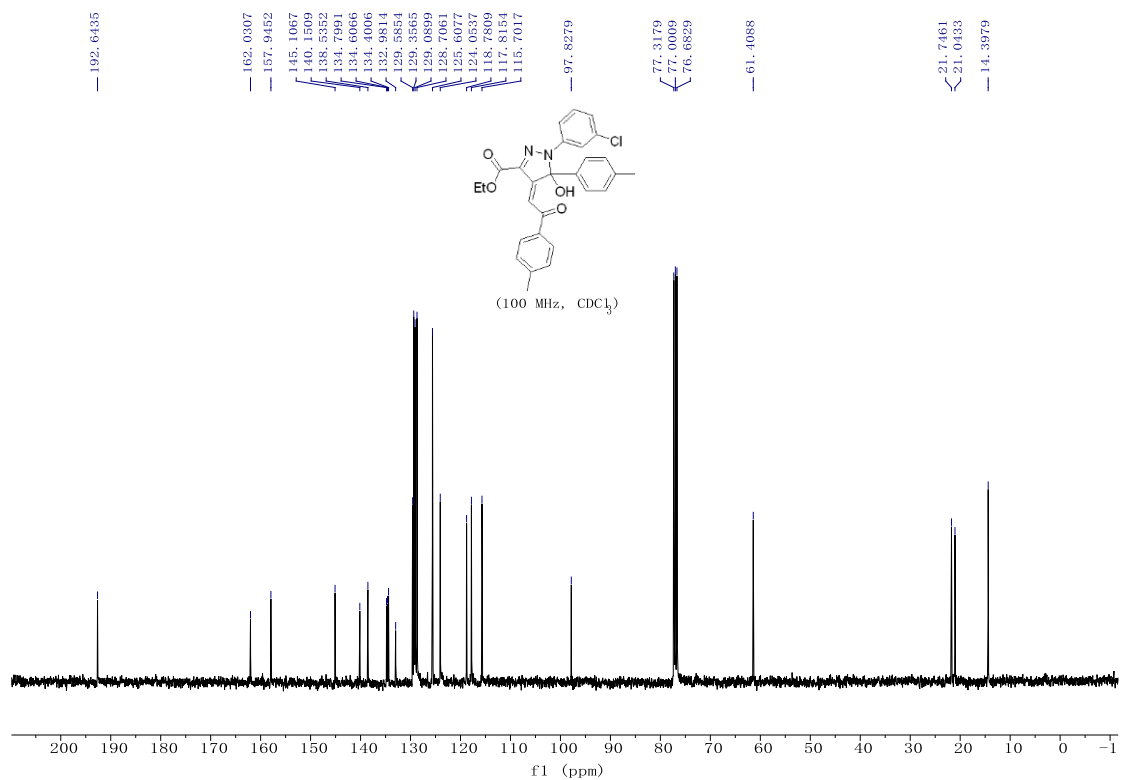

<sup>1</sup>H NMR and <sup>13</sup>C NMR spectrums of **3ha**

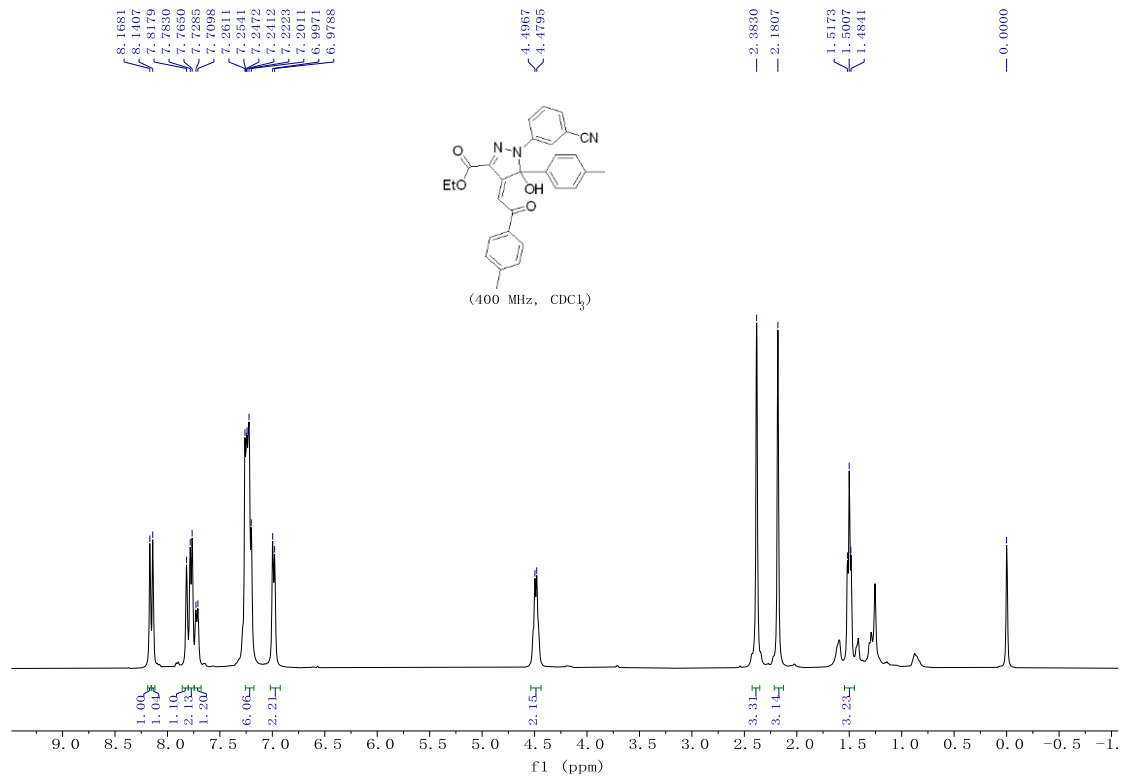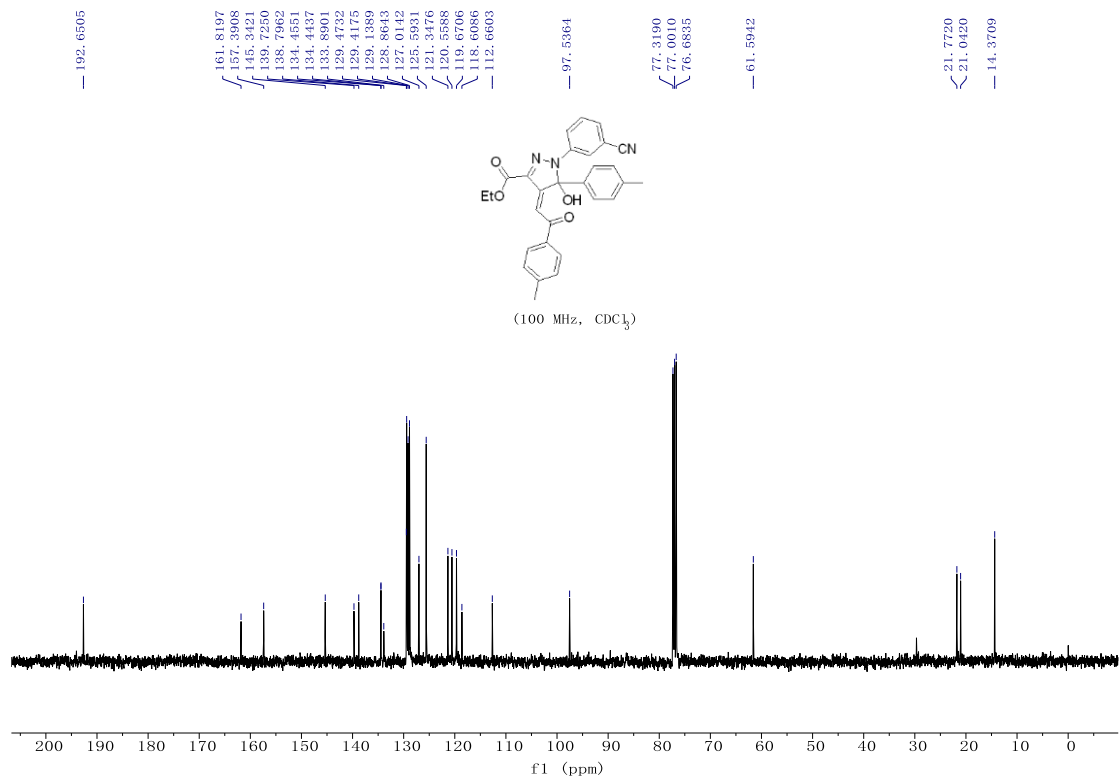

# <sup>1</sup>H NMR and <sup>13</sup>C NMR spectra of **3ia**

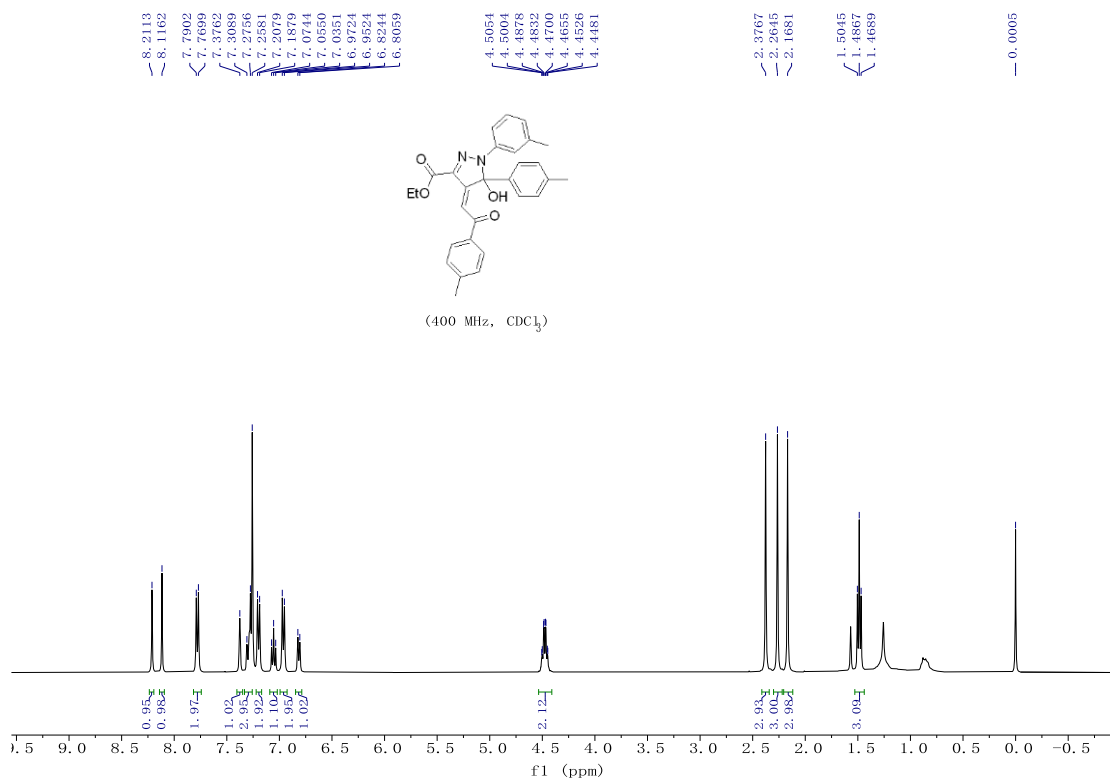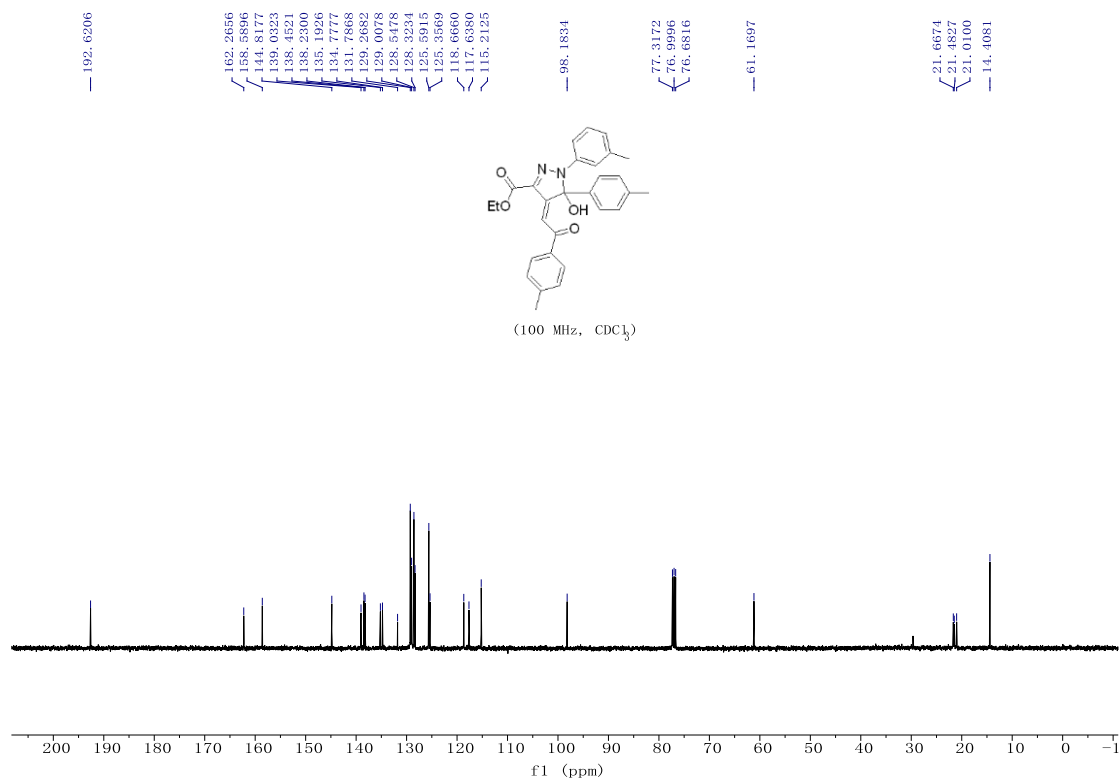

<sup>1</sup>H NMR and <sup>13</sup>C NMR spectra of **3ja**

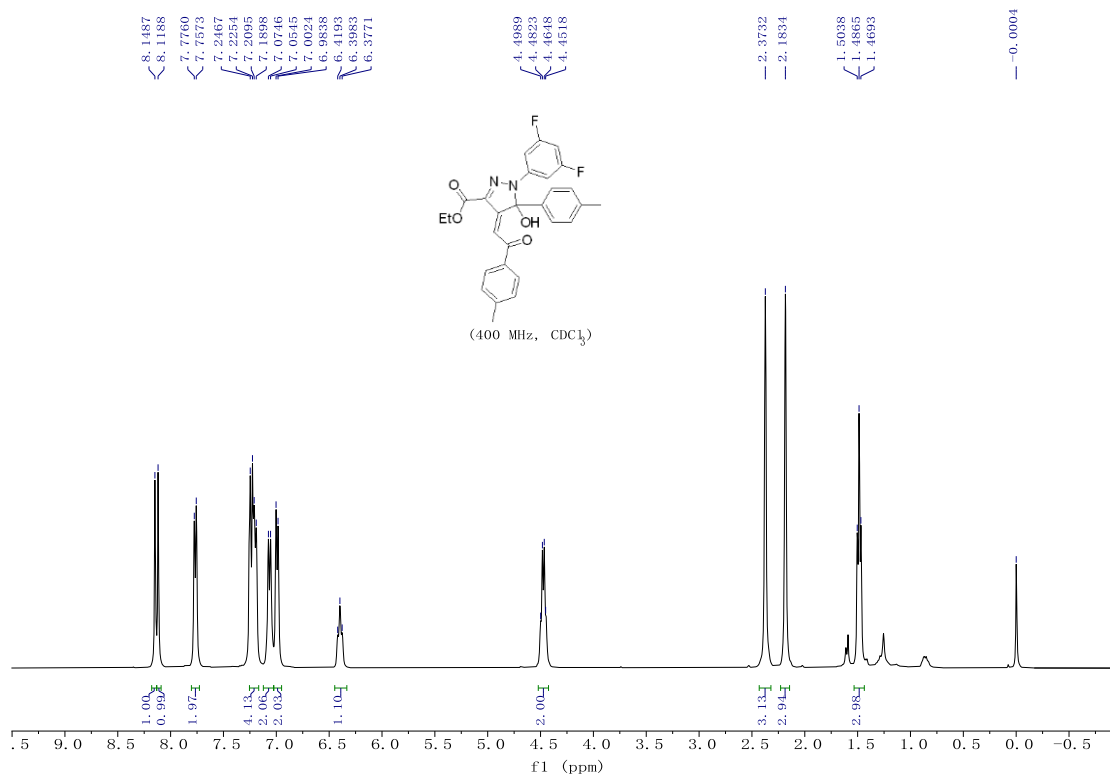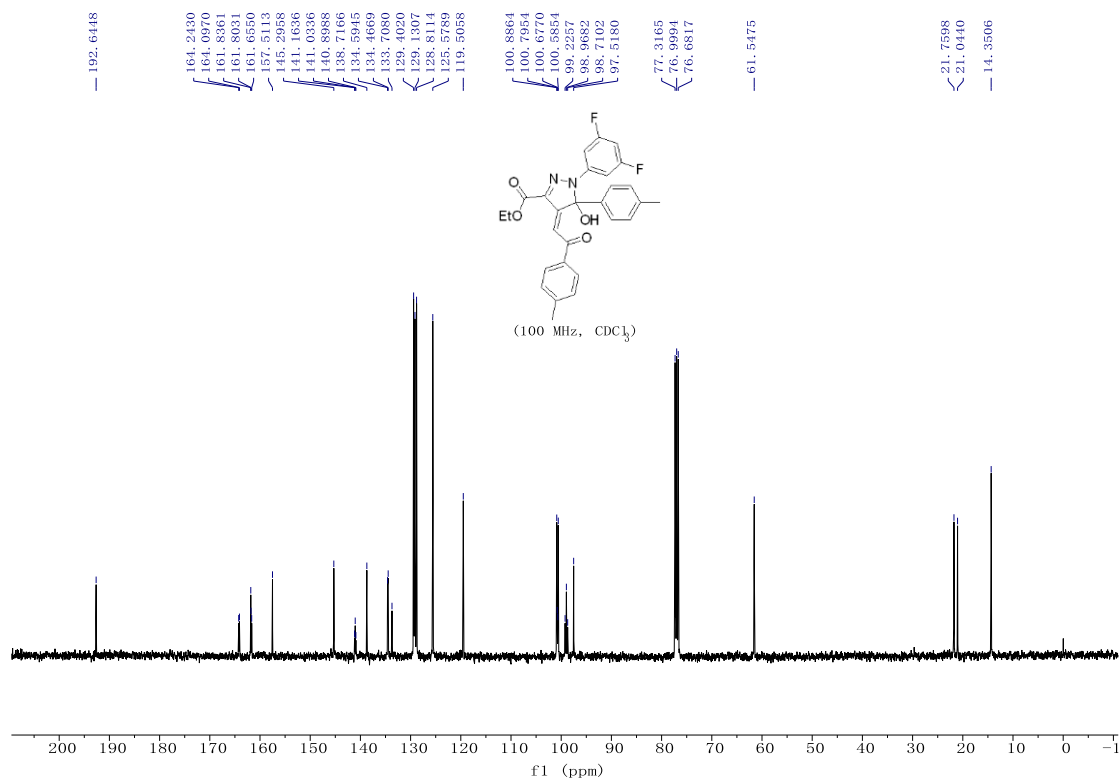

<sup>1</sup>H NMR and <sup>13</sup>C NMR spectrums of **3ka**

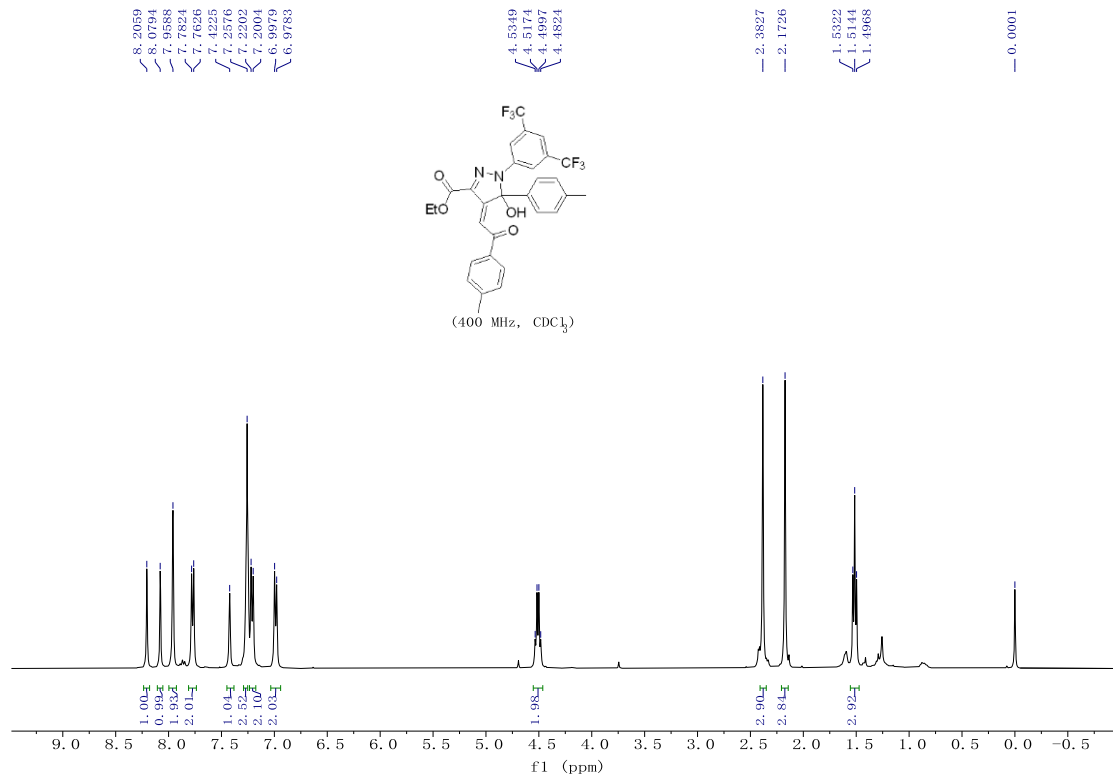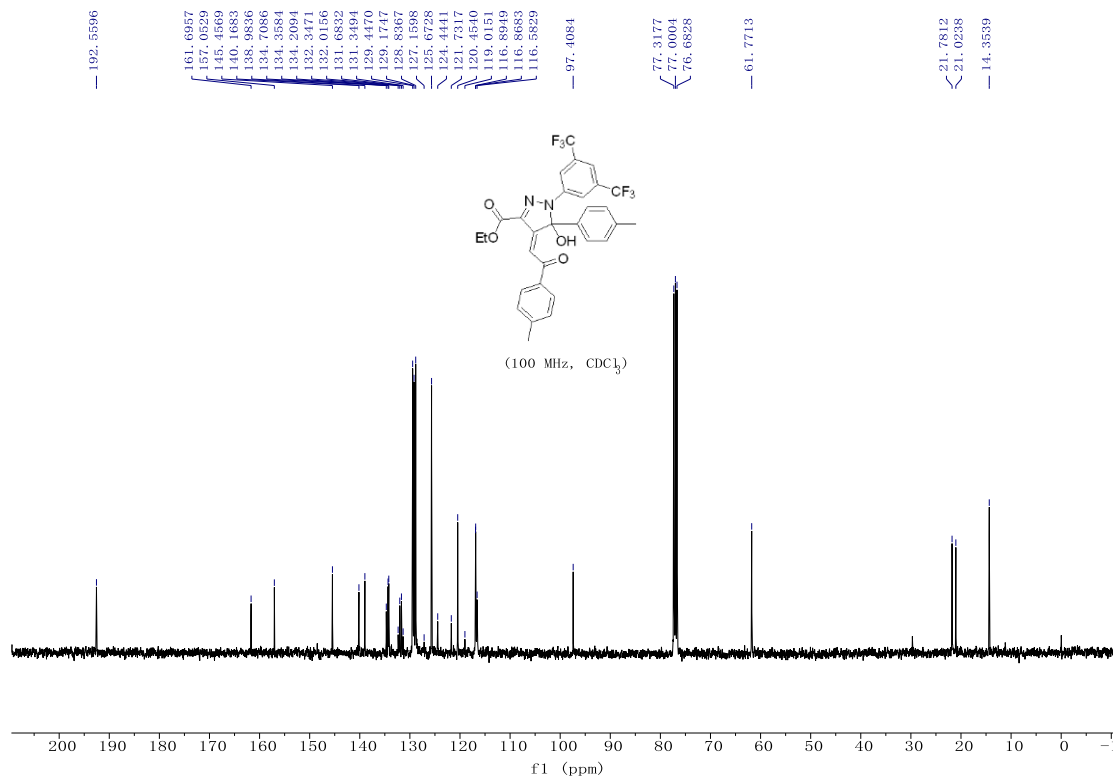

$^1\text{H}$  NMR and  $^{13}\text{C}$  NMR spectra of **31a**

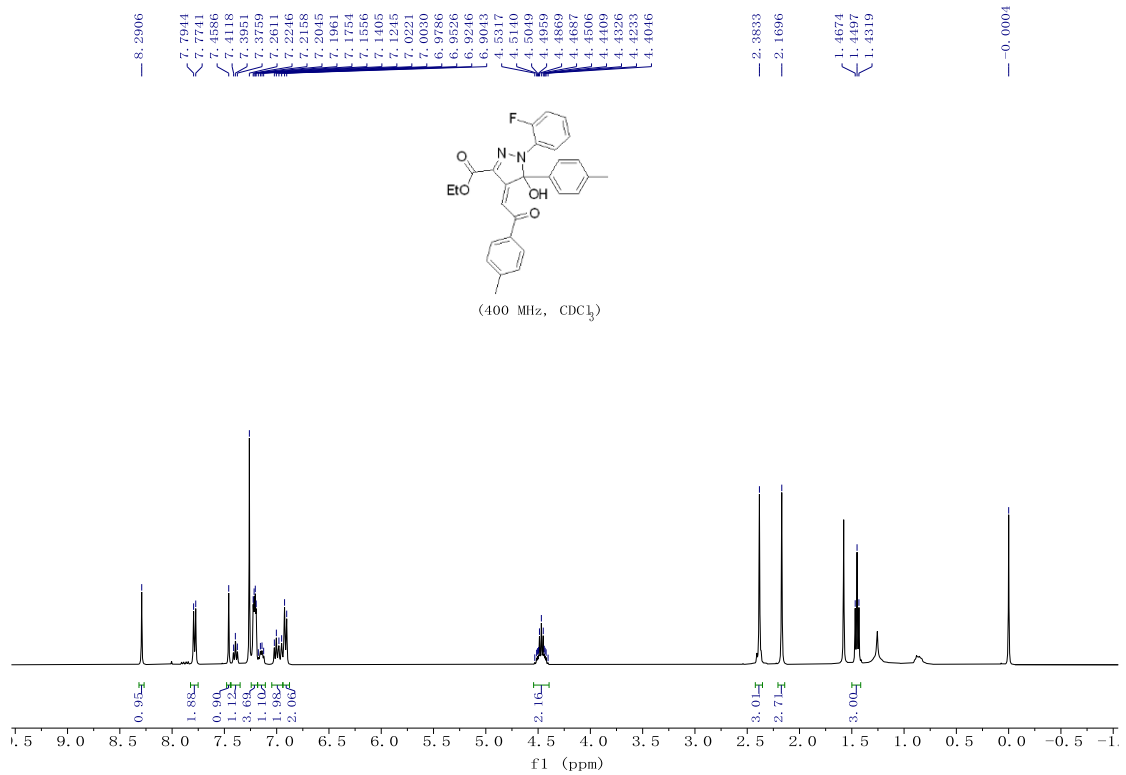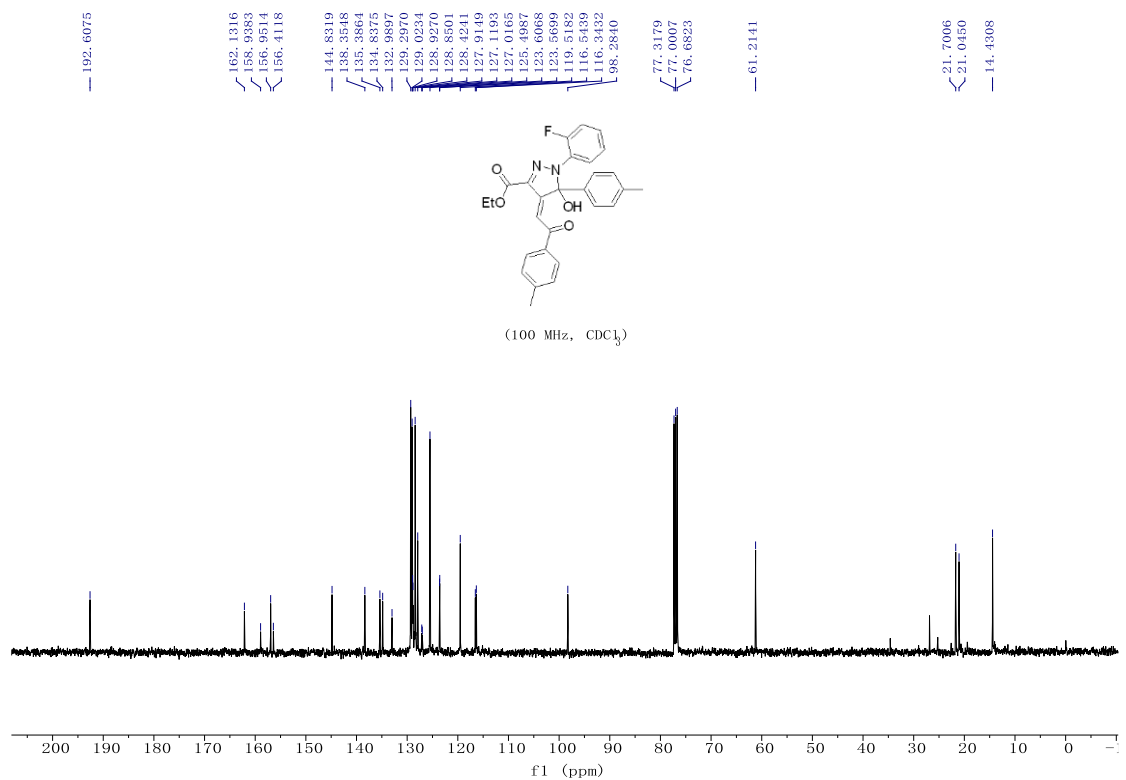



<sup>1</sup>H NMR and <sup>13</sup>C NMR spectrums of **3ma**

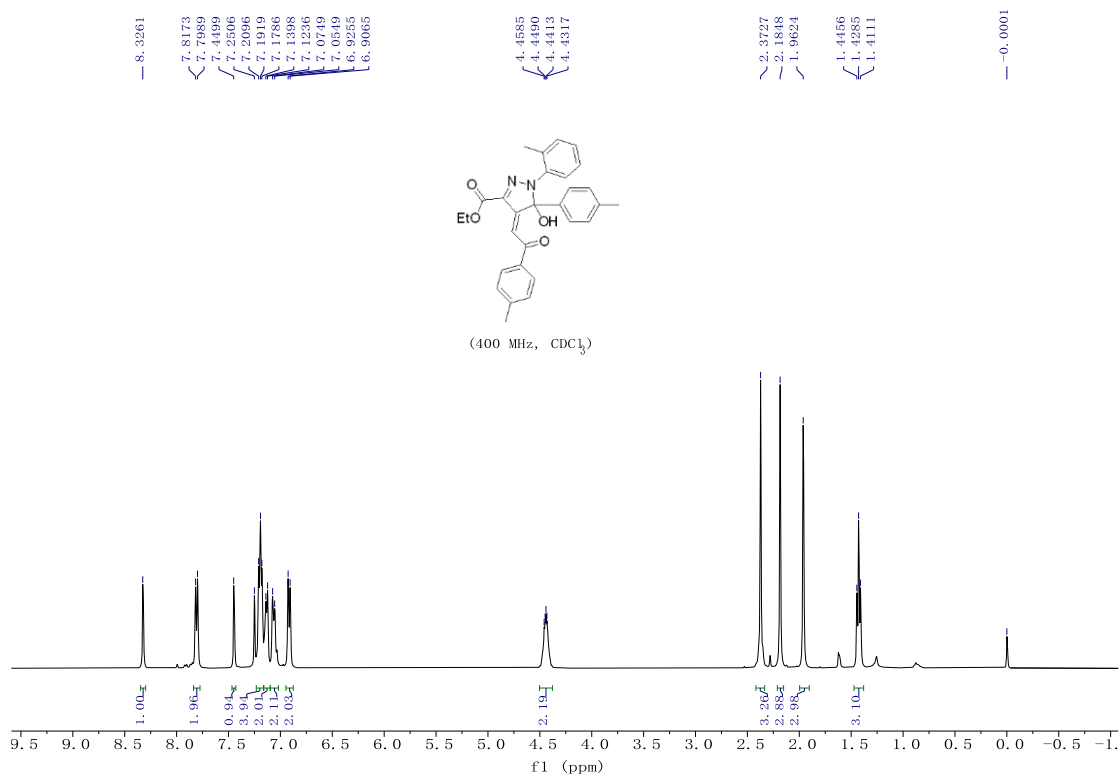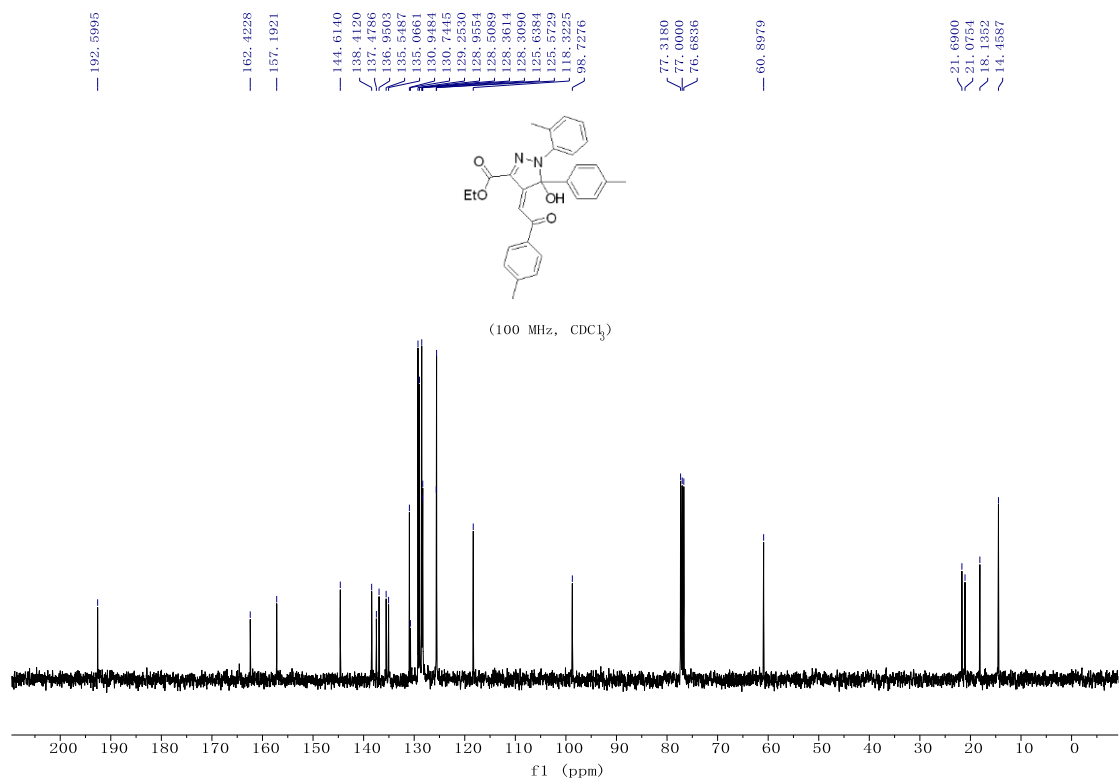

<sup>1</sup>H NMR and <sup>13</sup>C NMR spectrums of **3na**

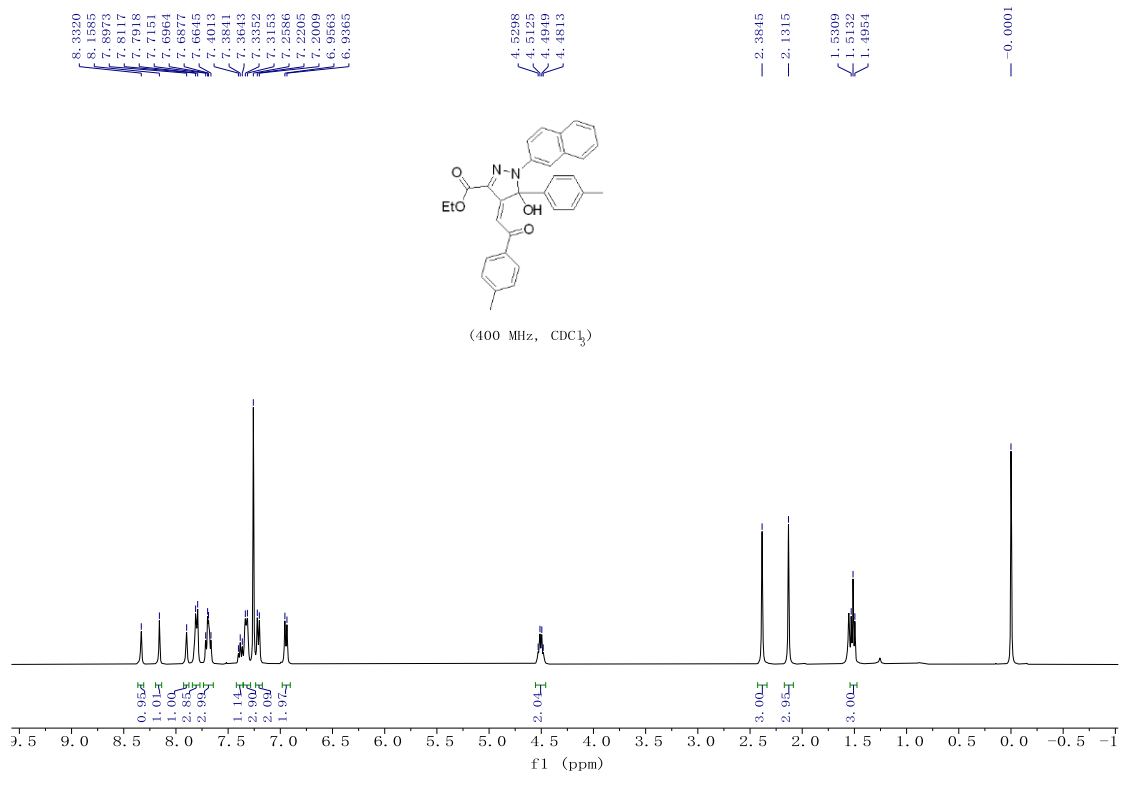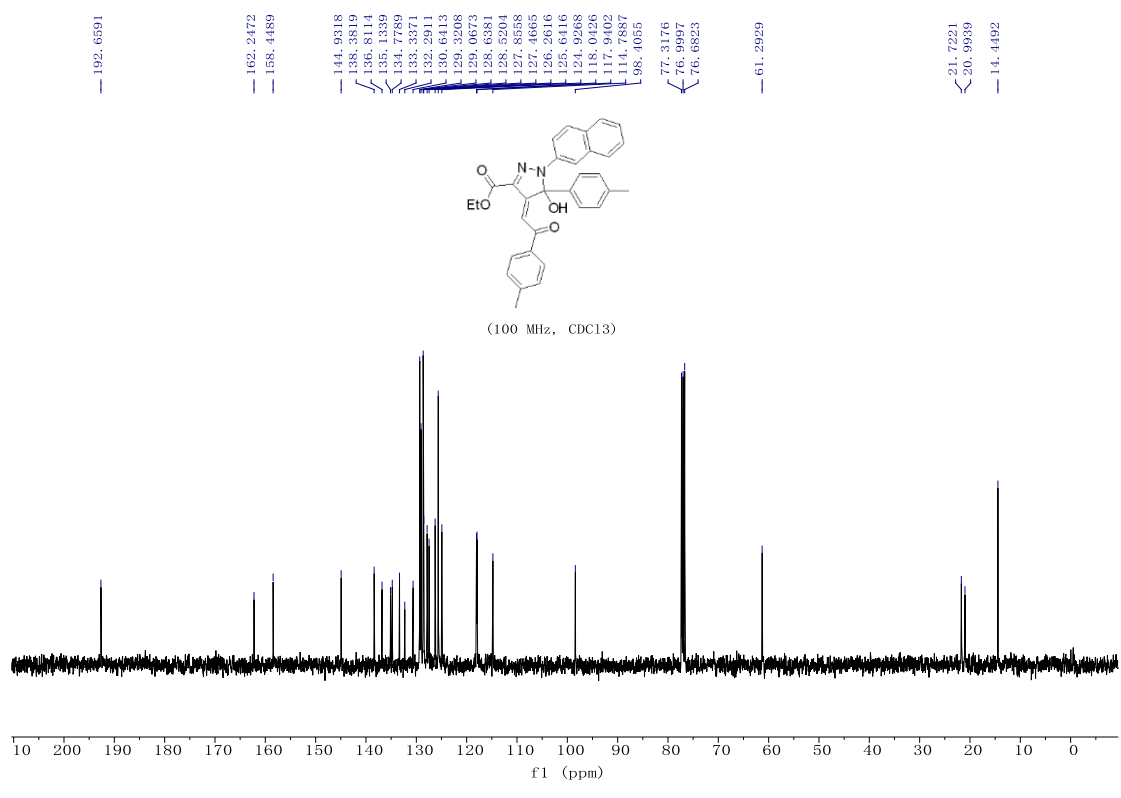

<sup>1</sup>H NMR and <sup>13</sup>C NMR spectrums of **3db**

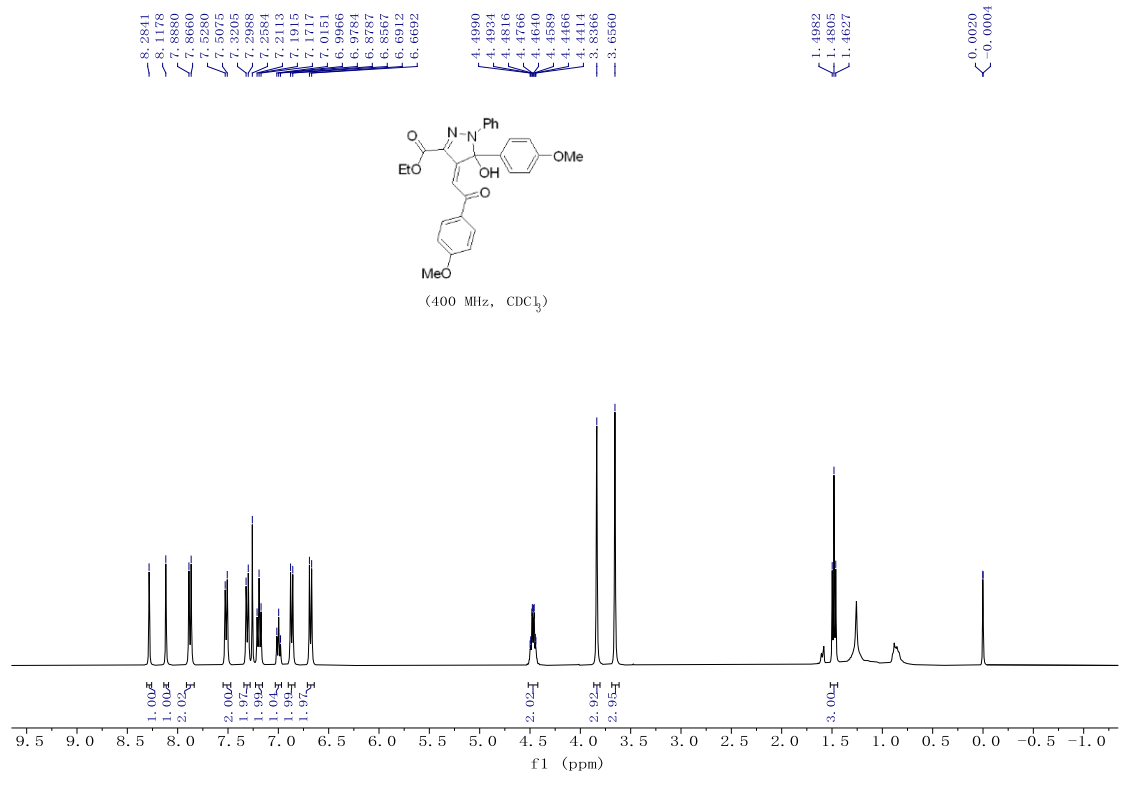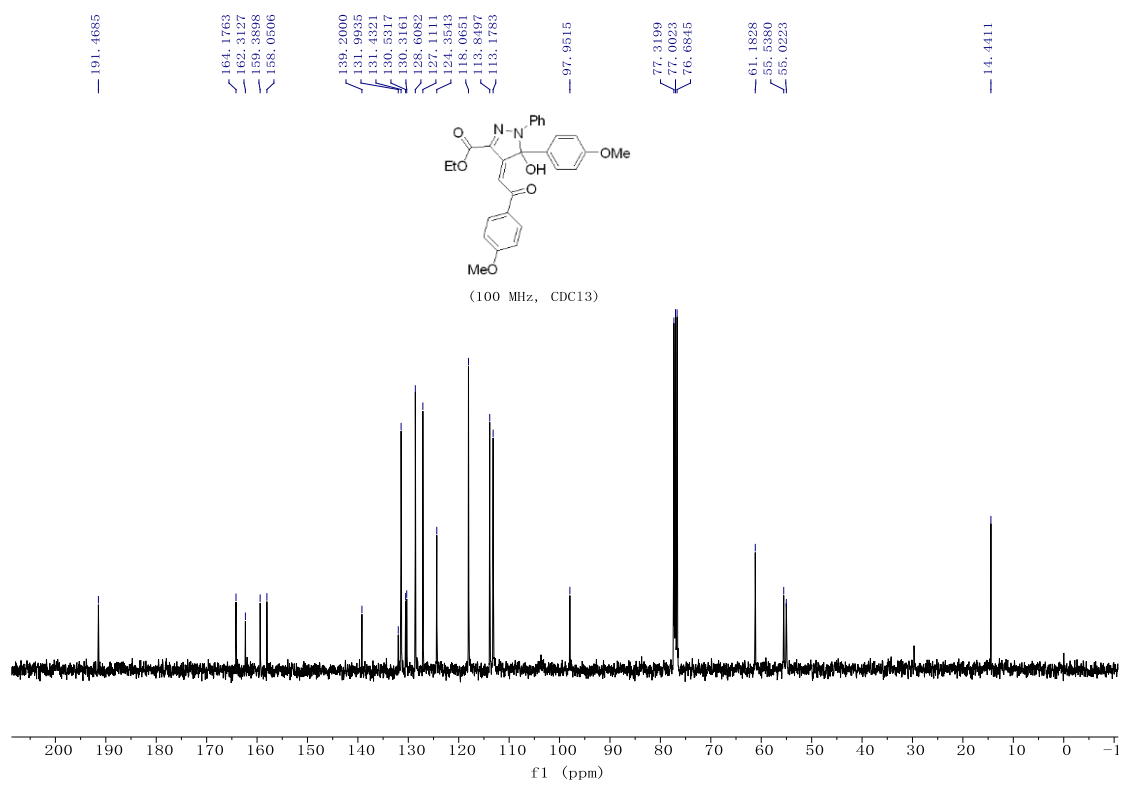

# <sup>1</sup>H NMR and <sup>13</sup>C NMR spectra of 3dc

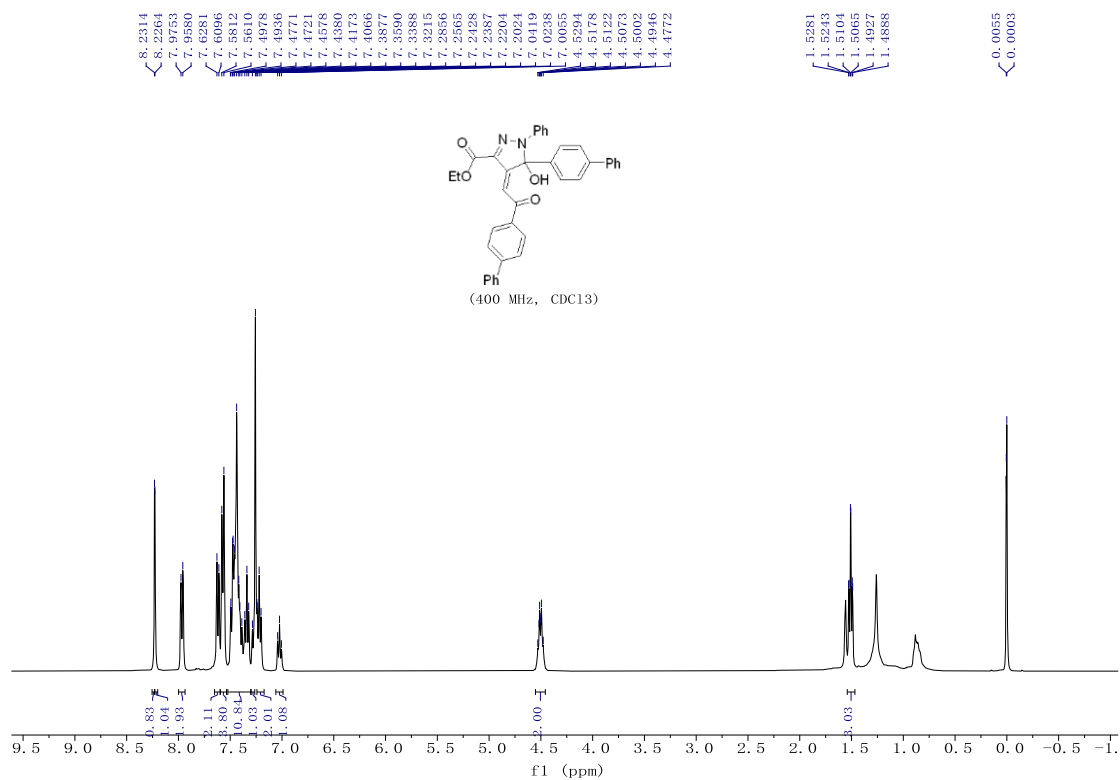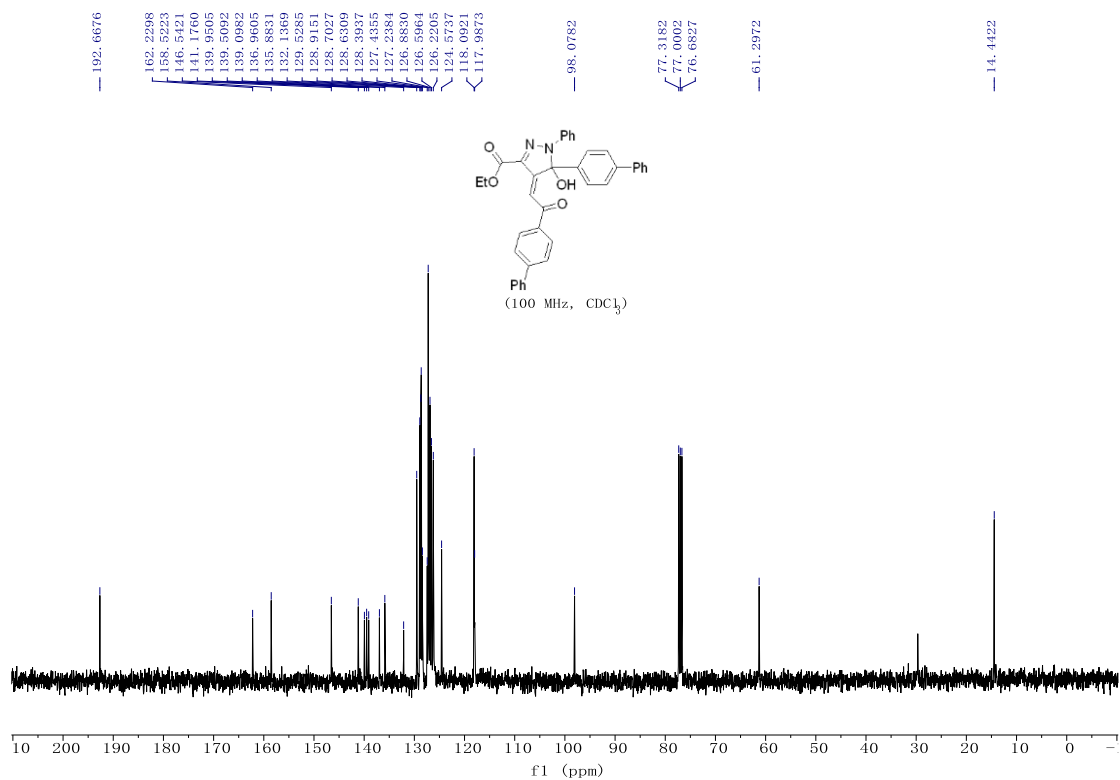

<sup>1</sup>H NMR and <sup>13</sup>C NMR spectra of **3dd**

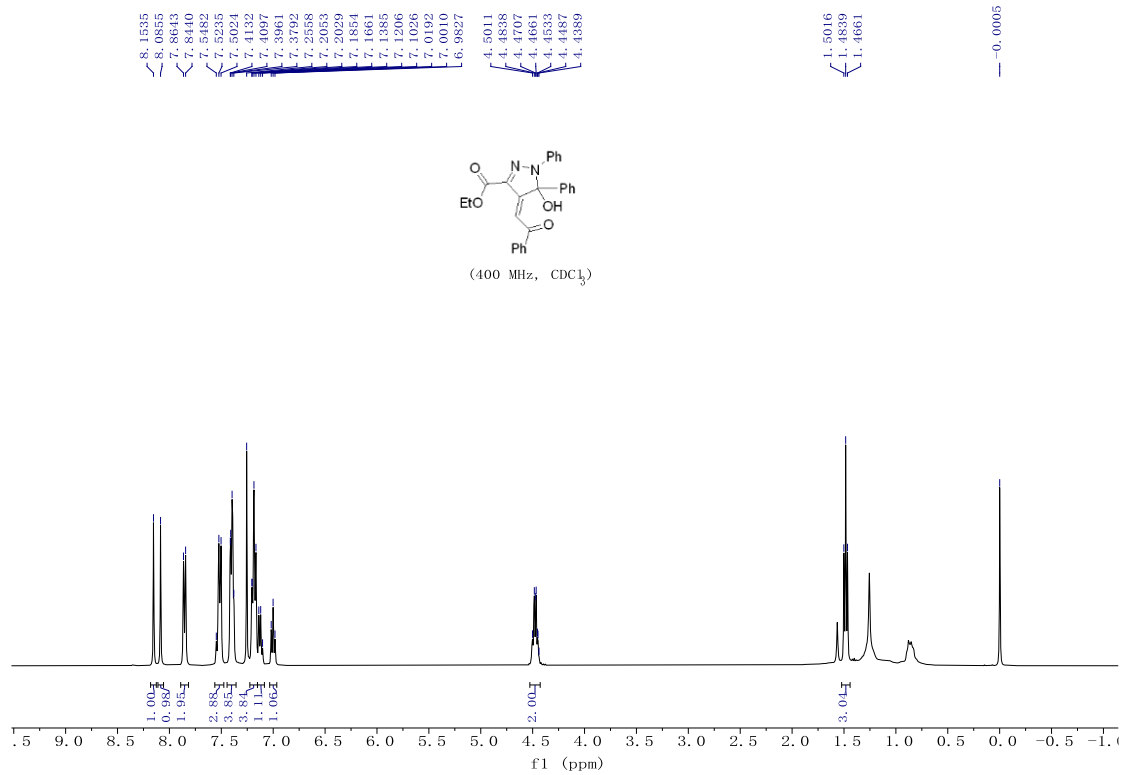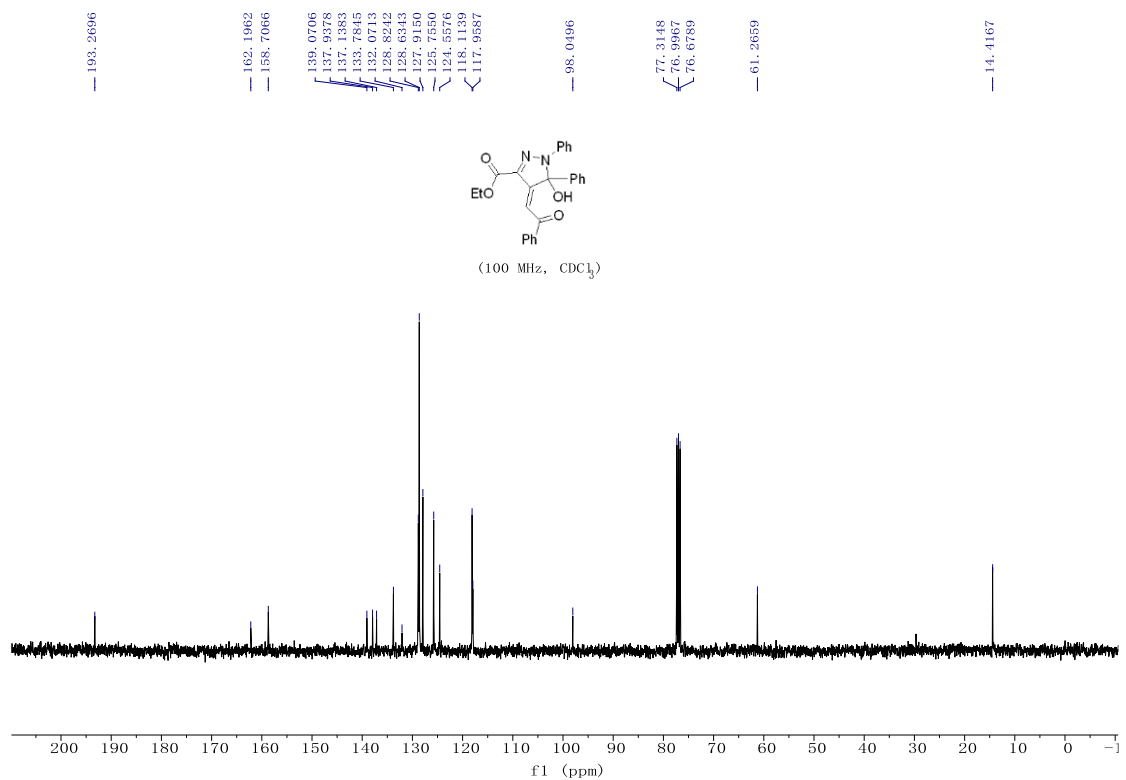

<sup>1</sup>H NMR and <sup>13</sup>C NMR spectrums of **3de**

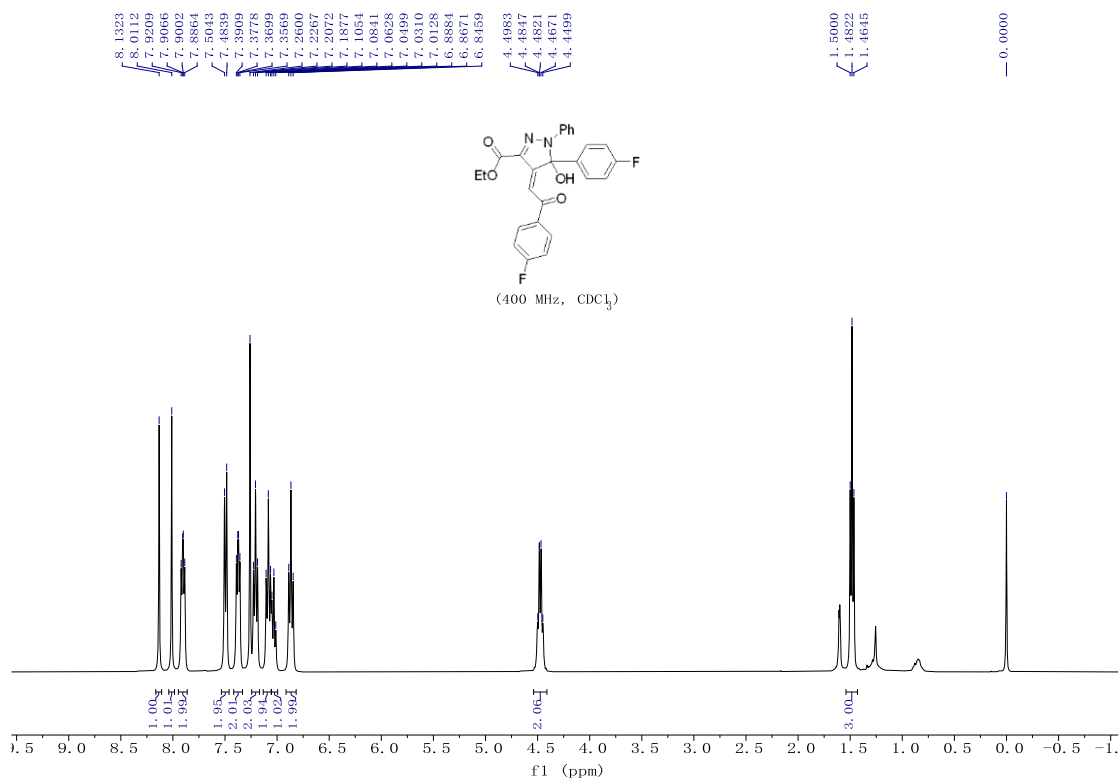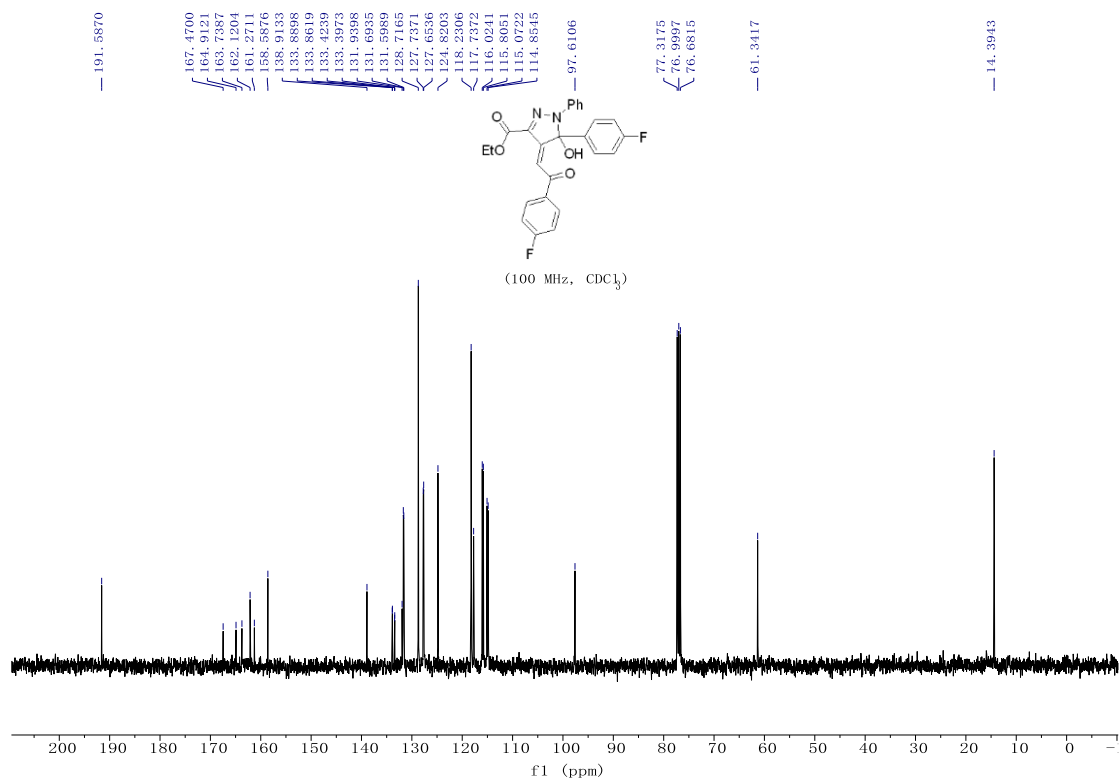

# <sup>1</sup>H NMR and <sup>13</sup>C NMR spectra of **3df**

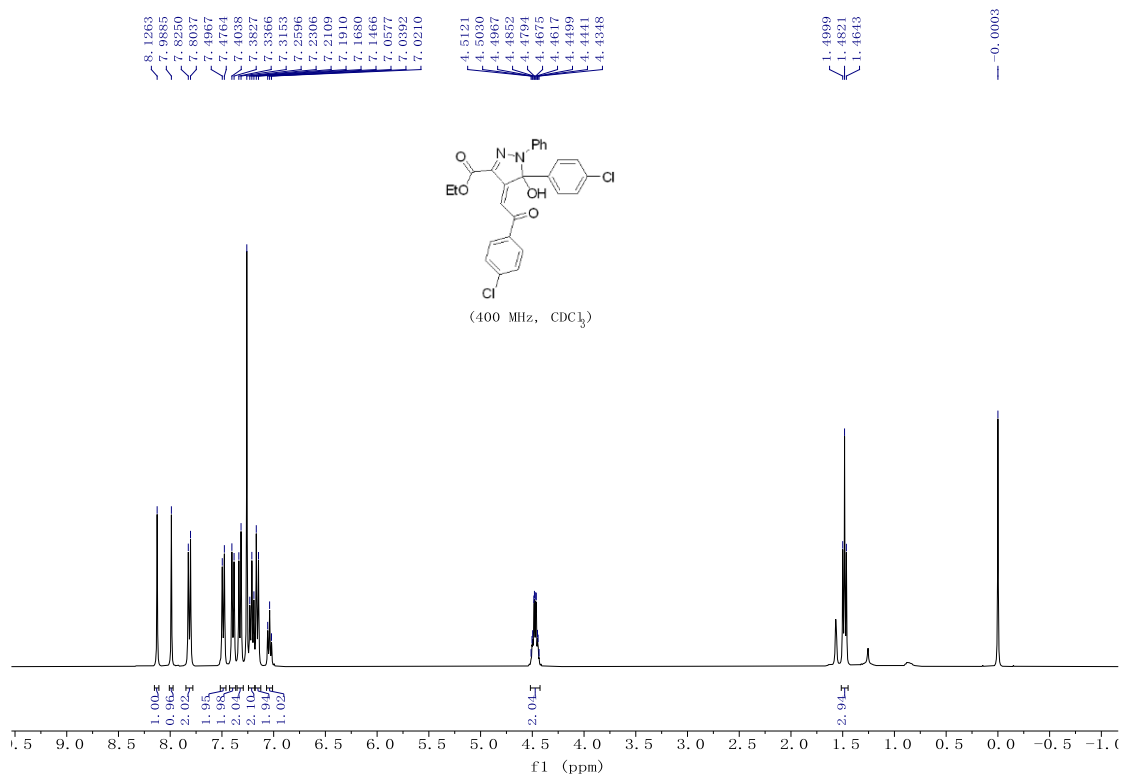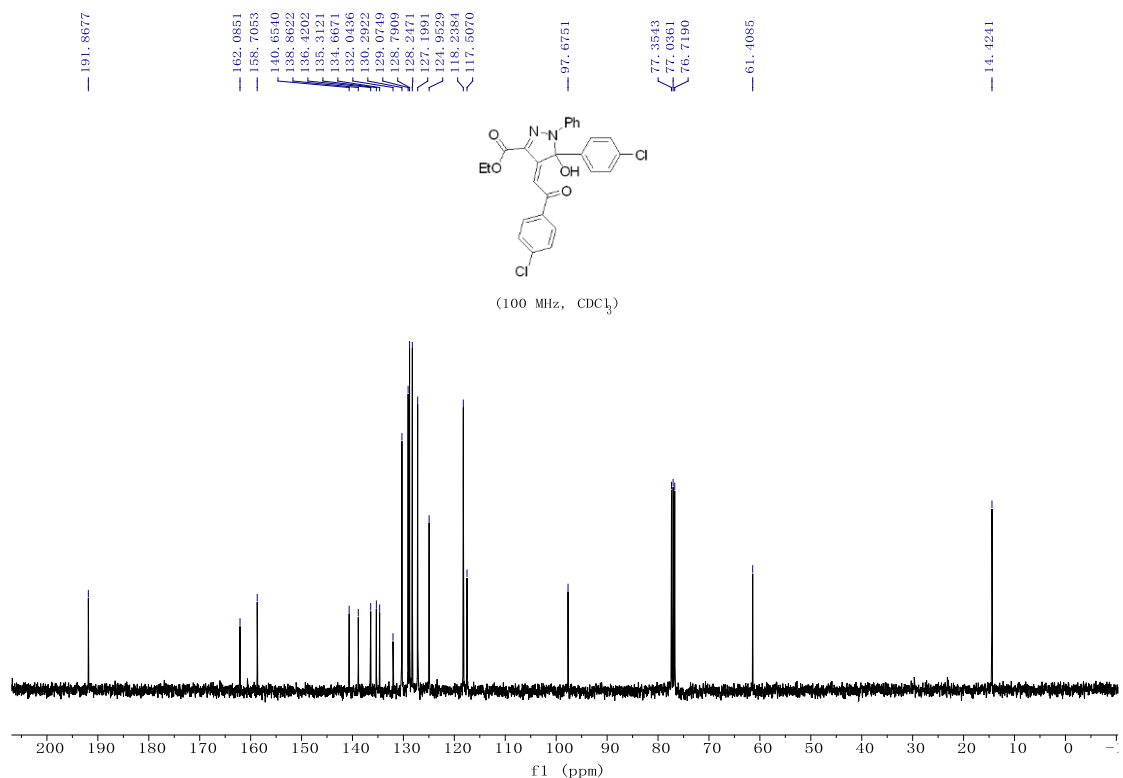

<sup>1</sup>H NMR and <sup>13</sup>C NMR spectrums of **3dg**

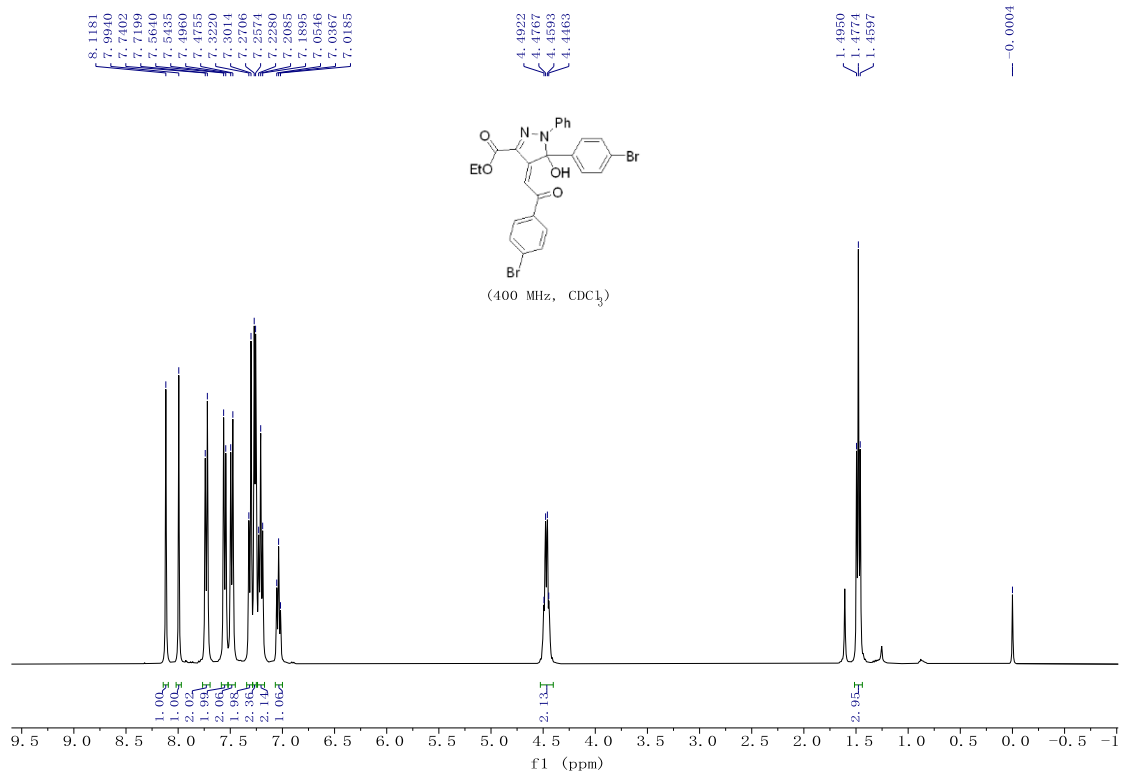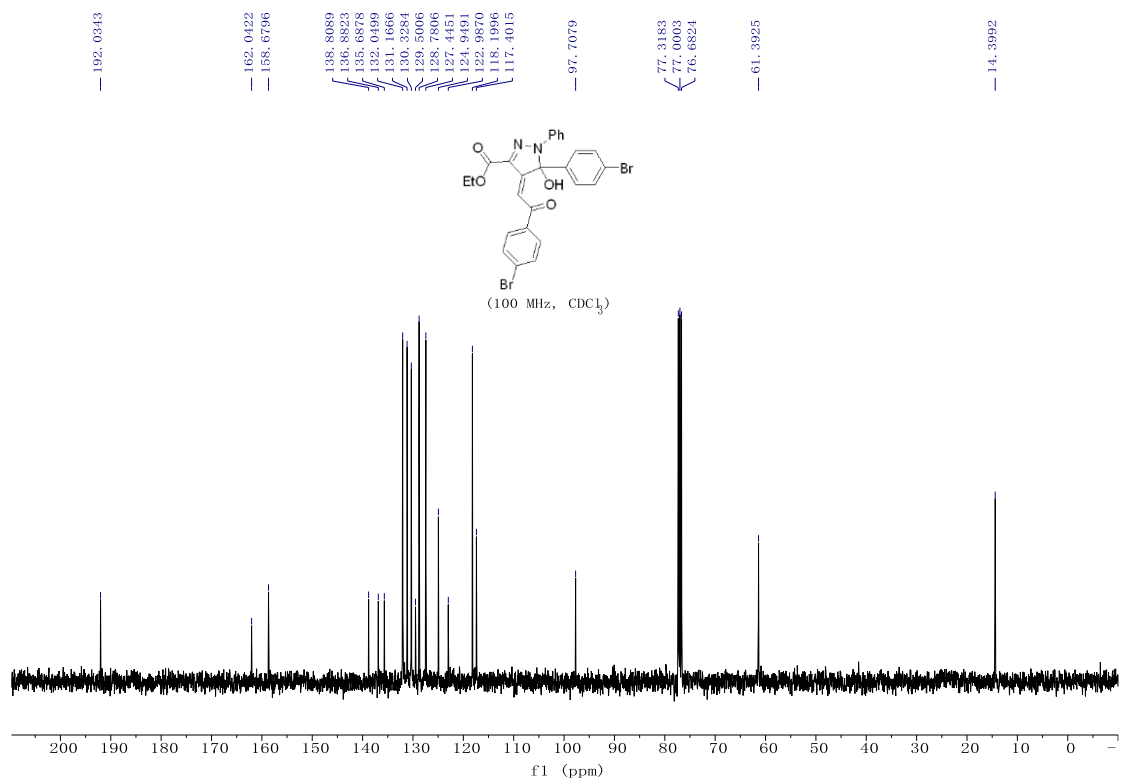



<sup>1</sup>H NMR and <sup>13</sup>C NMR spectrums of **3dh**

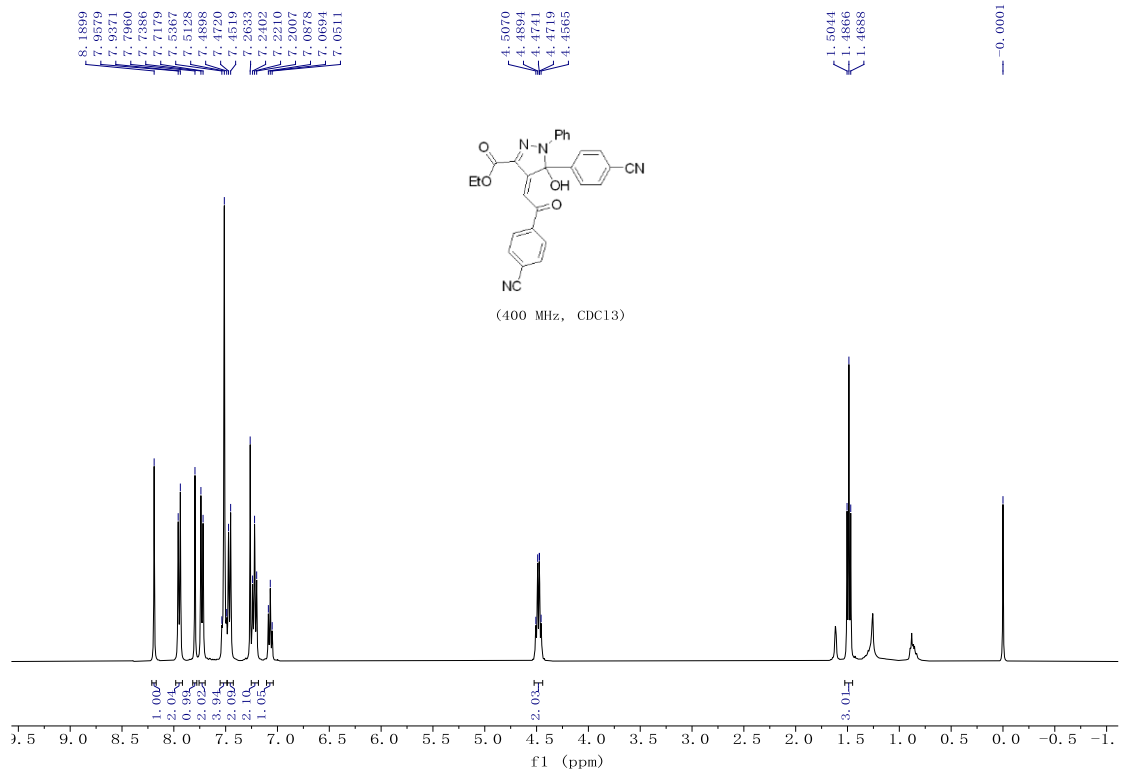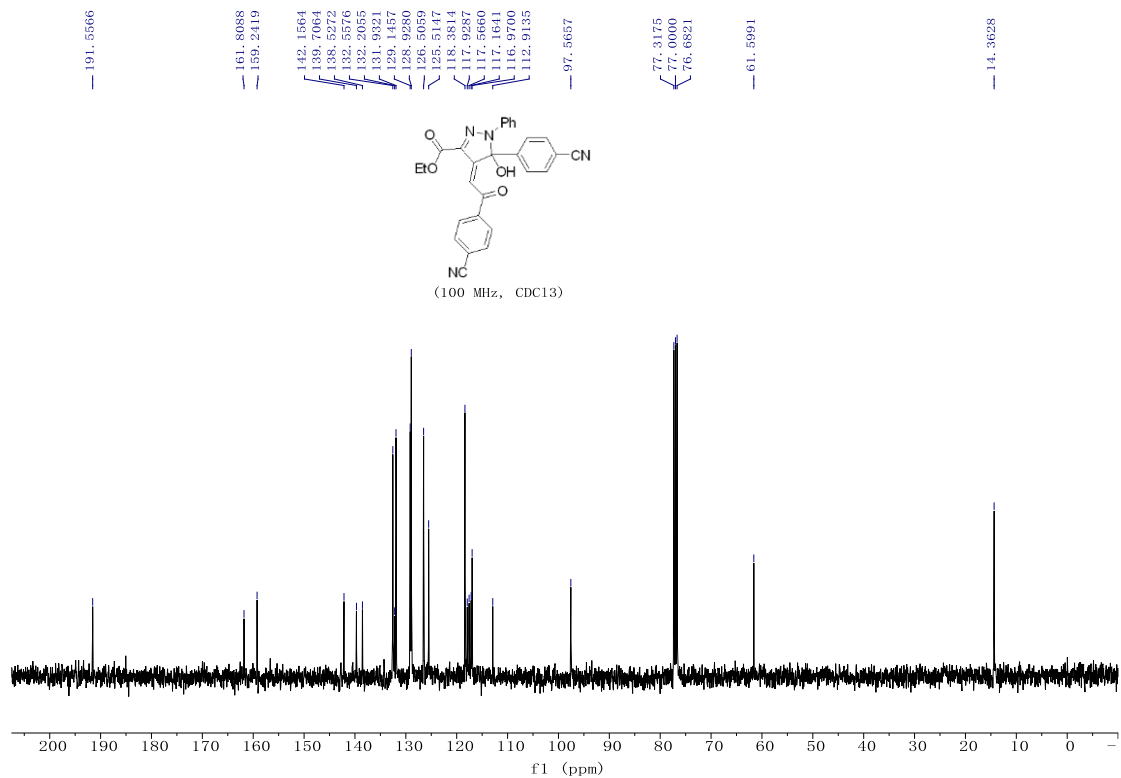

<sup>1</sup>H NMR and <sup>13</sup>C NMR spectra of **3di**

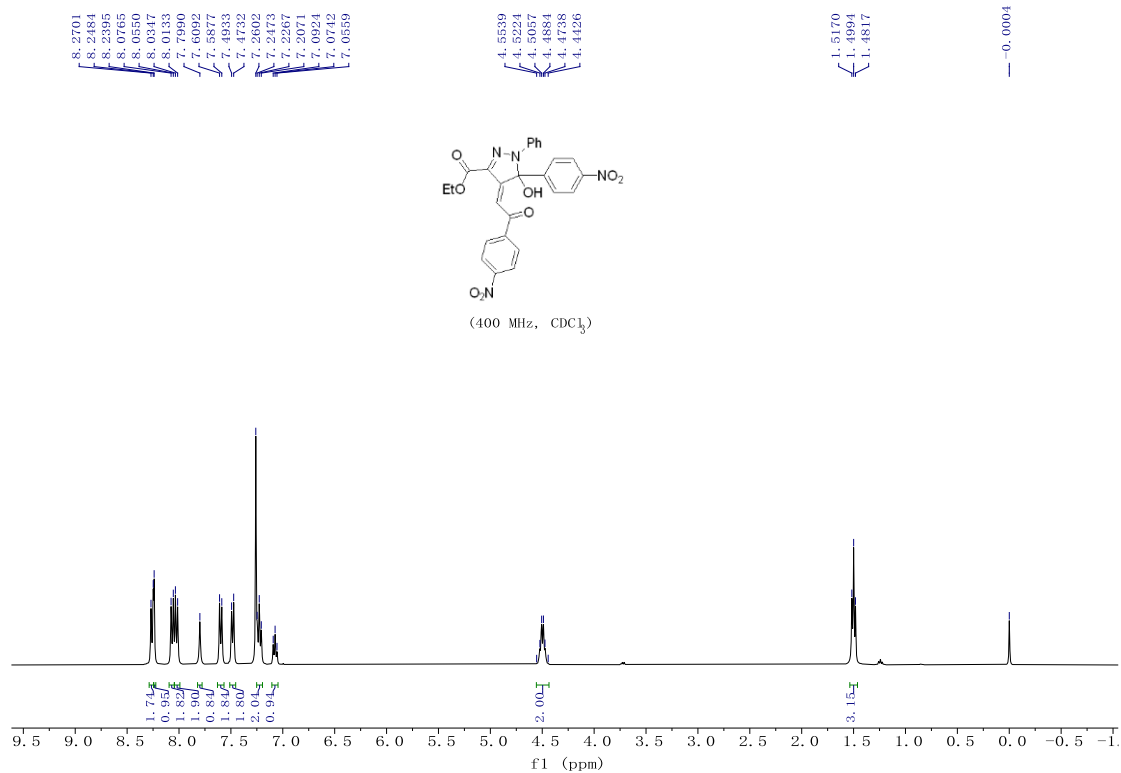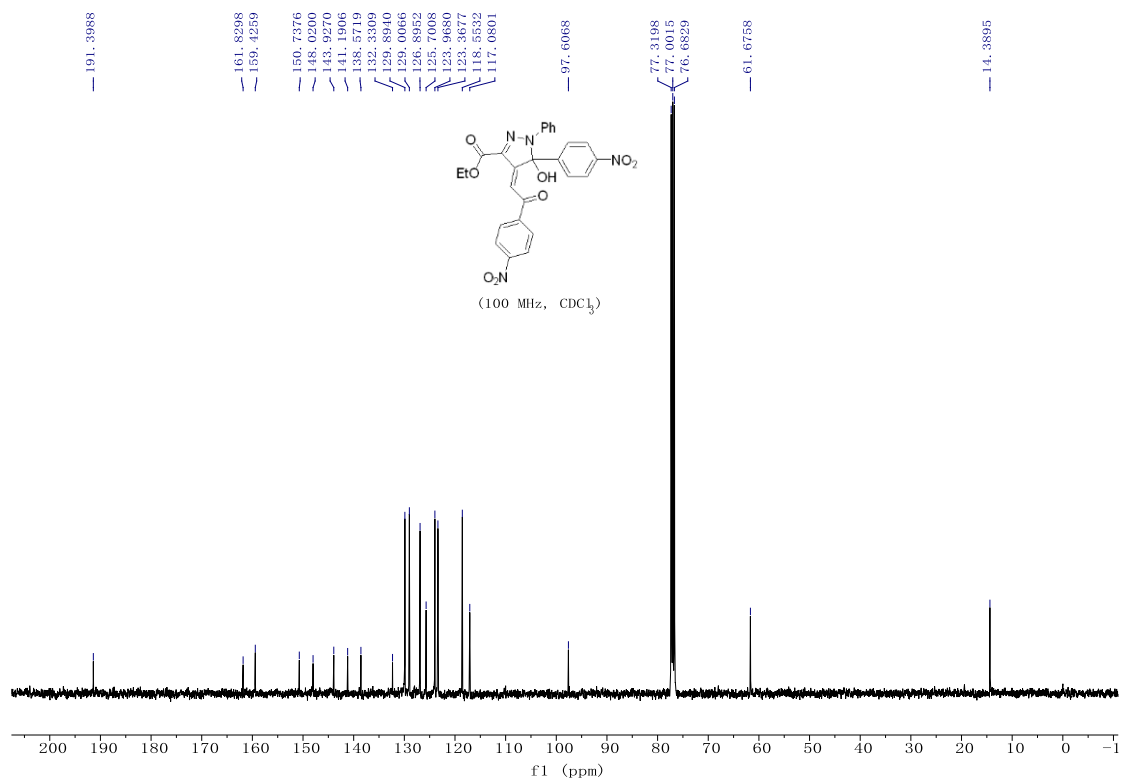

# <sup>1</sup>H NMR and <sup>13</sup>C NMR spectrums of **3dj**

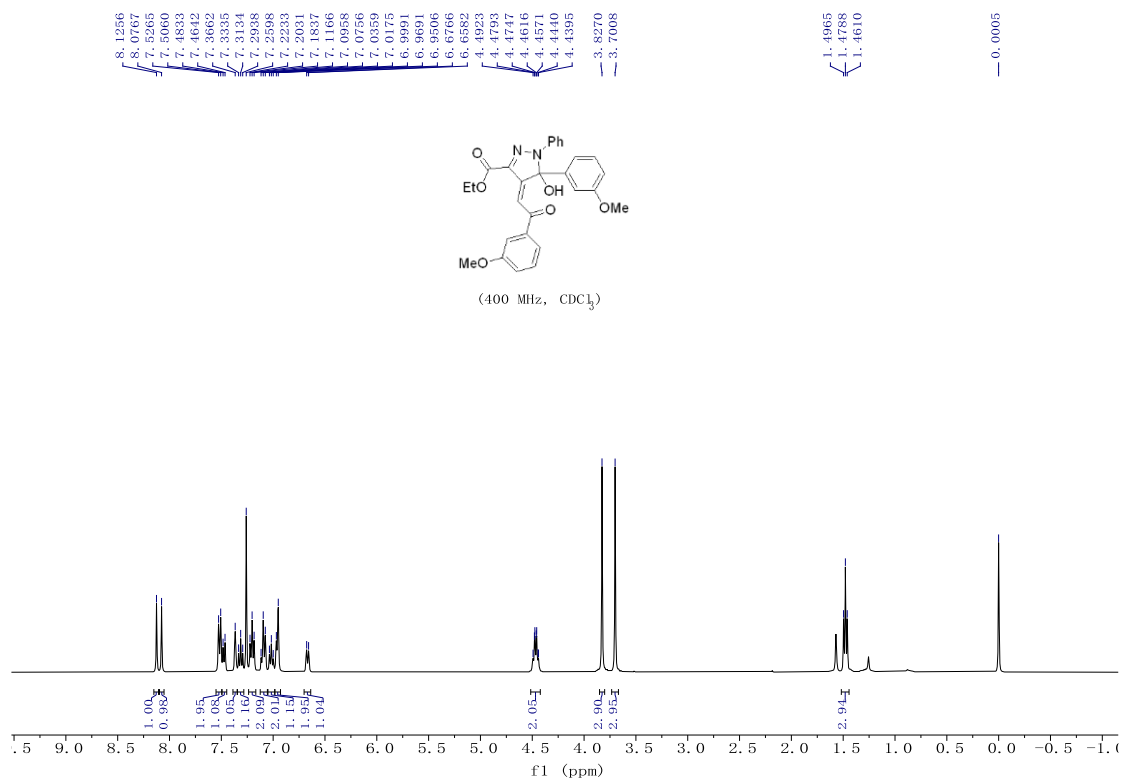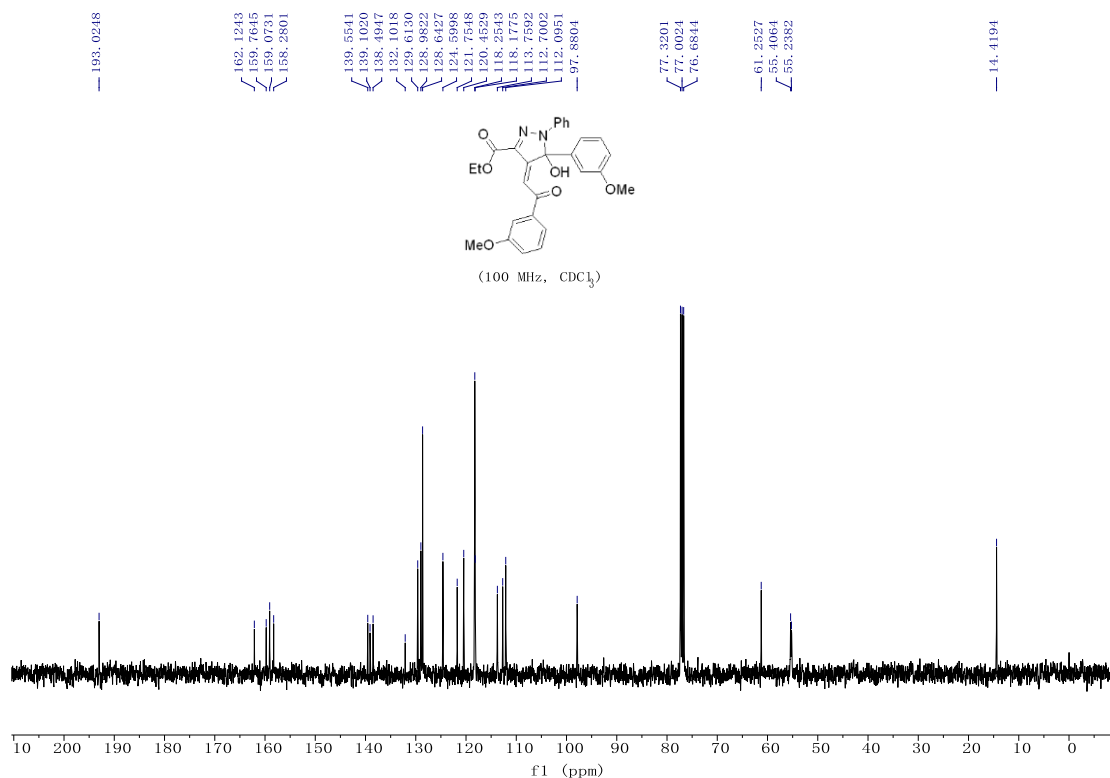

# <sup>1</sup>H NMR and <sup>13</sup>C NMR spectrums of **3dk**

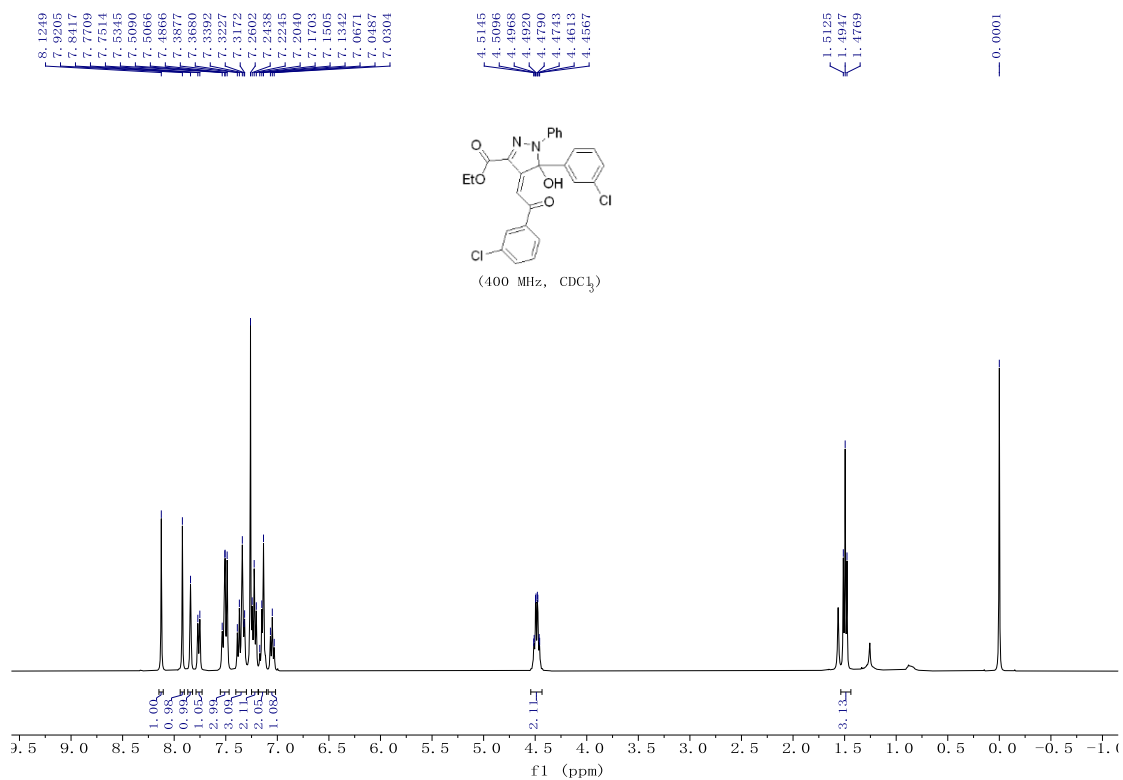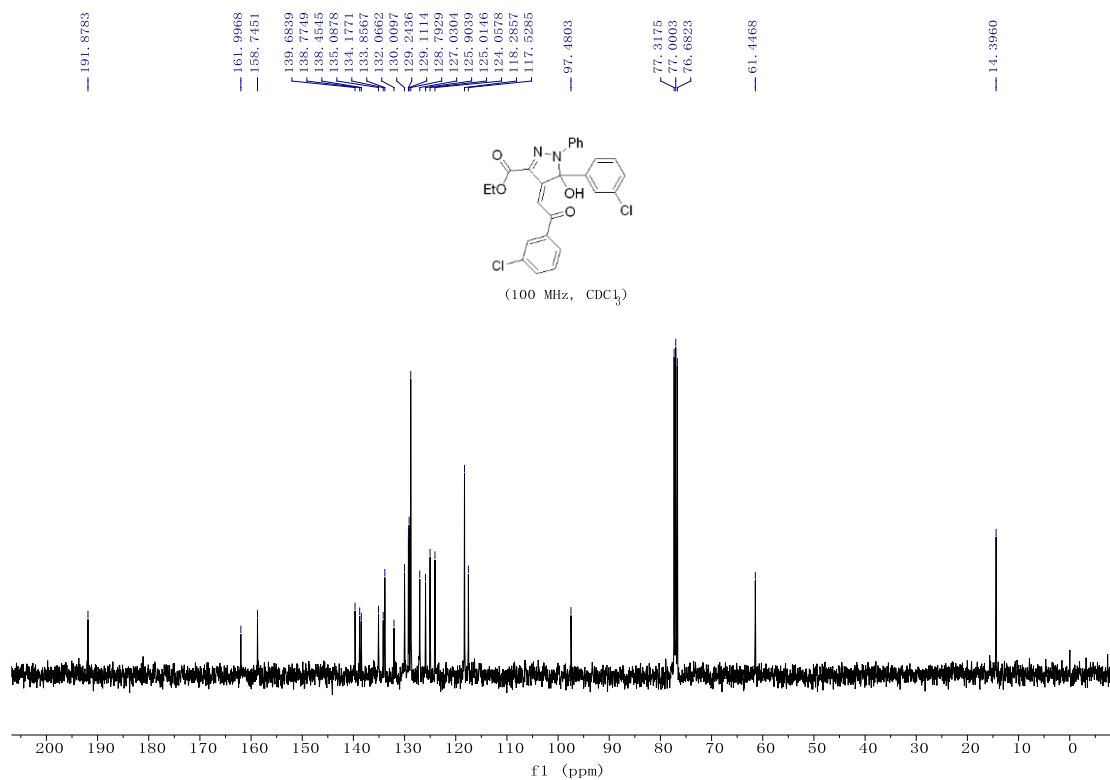

<sup>1</sup>H NMR and <sup>13</sup>C NMR spectra of **3dl**

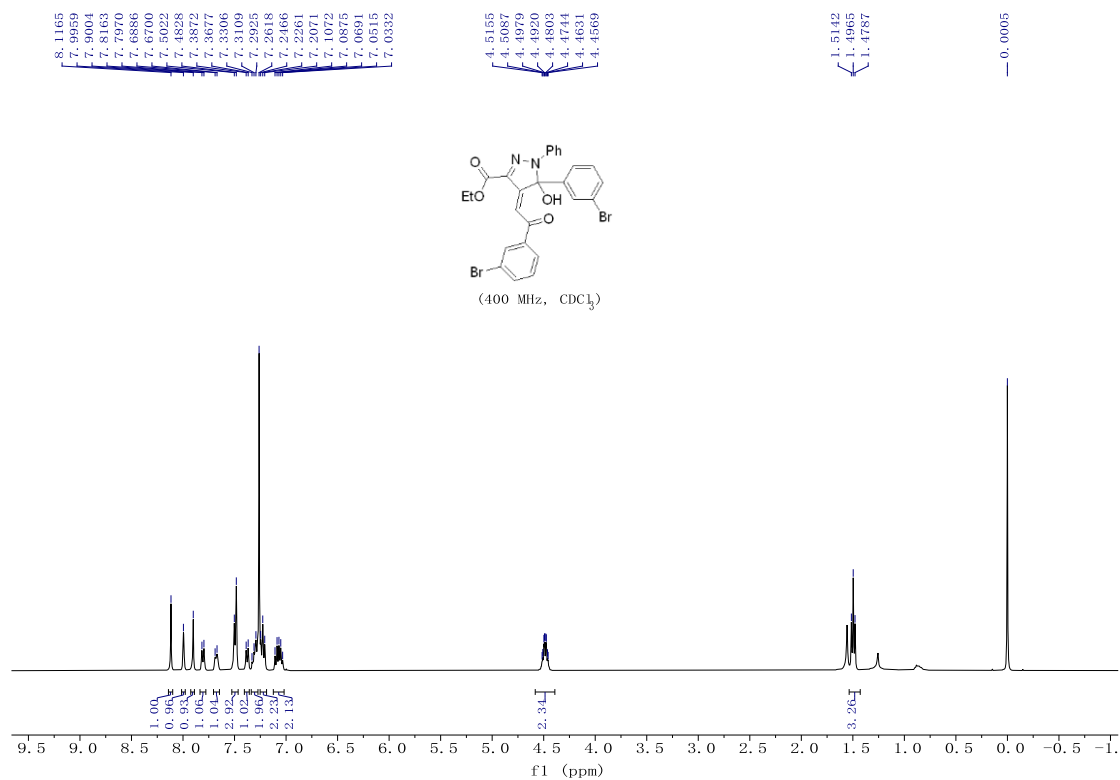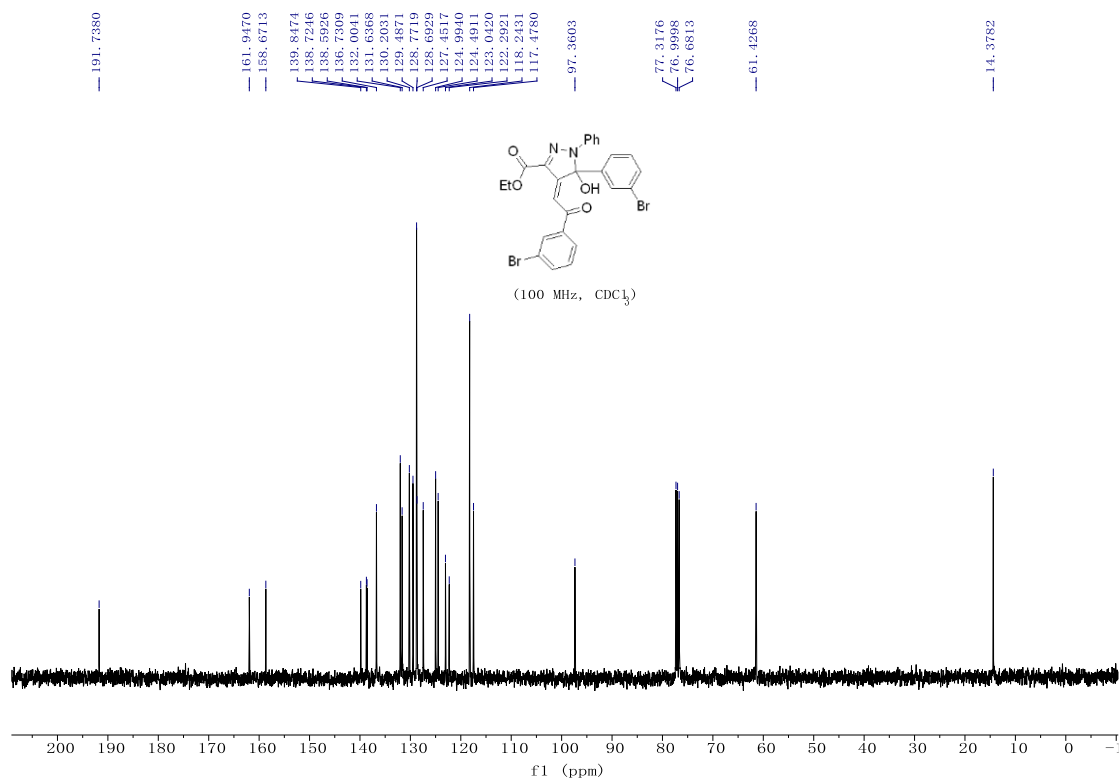

<sup>1</sup>H NMR and <sup>13</sup>C NMR spectrums of **3dm**

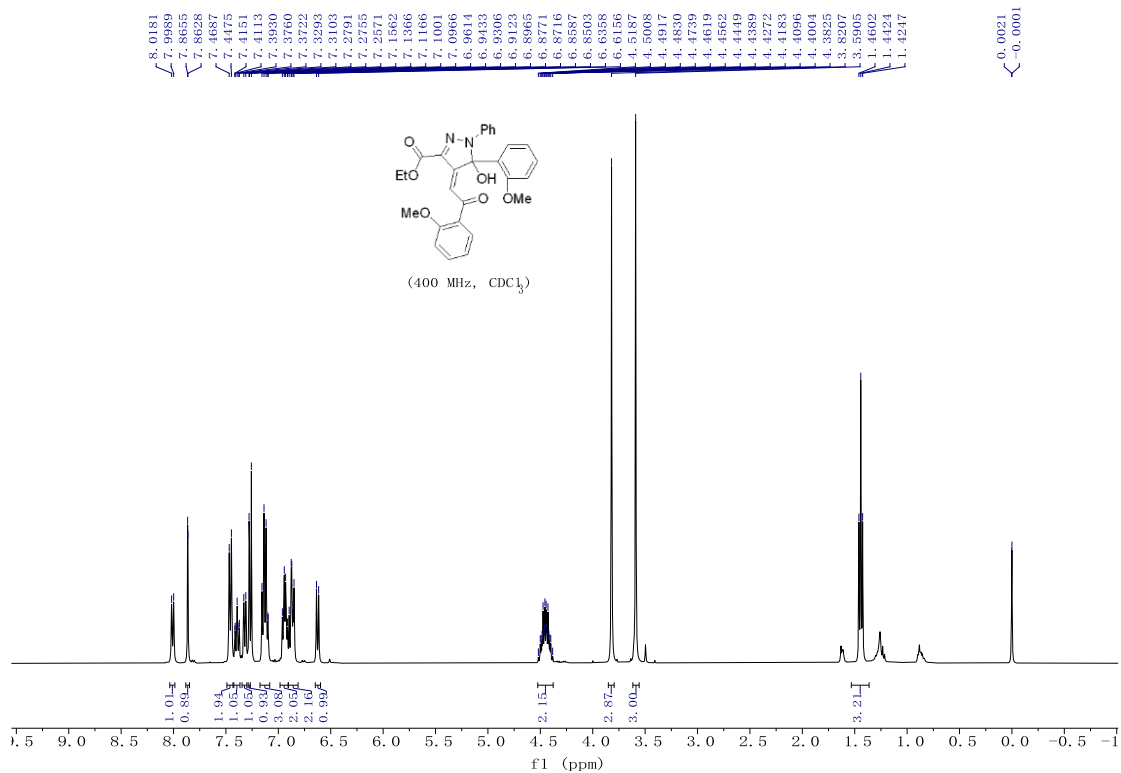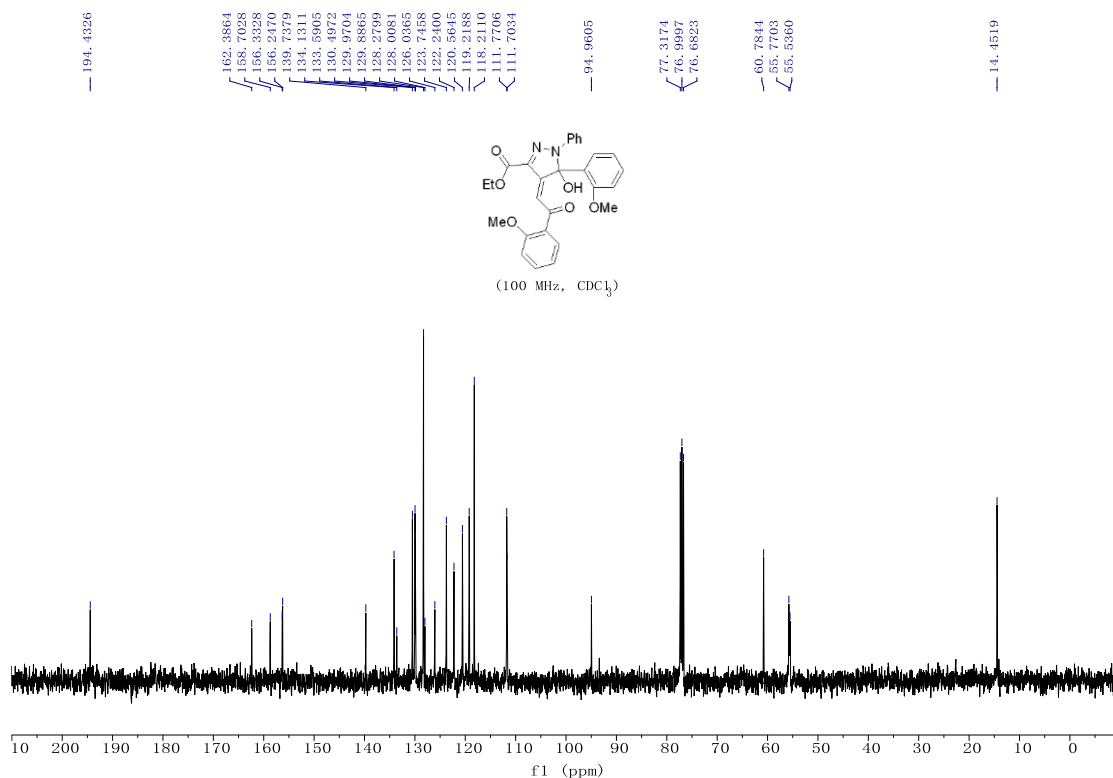

<sup>1</sup>H NMR and <sup>13</sup>C NMR spectrums of **3dn**

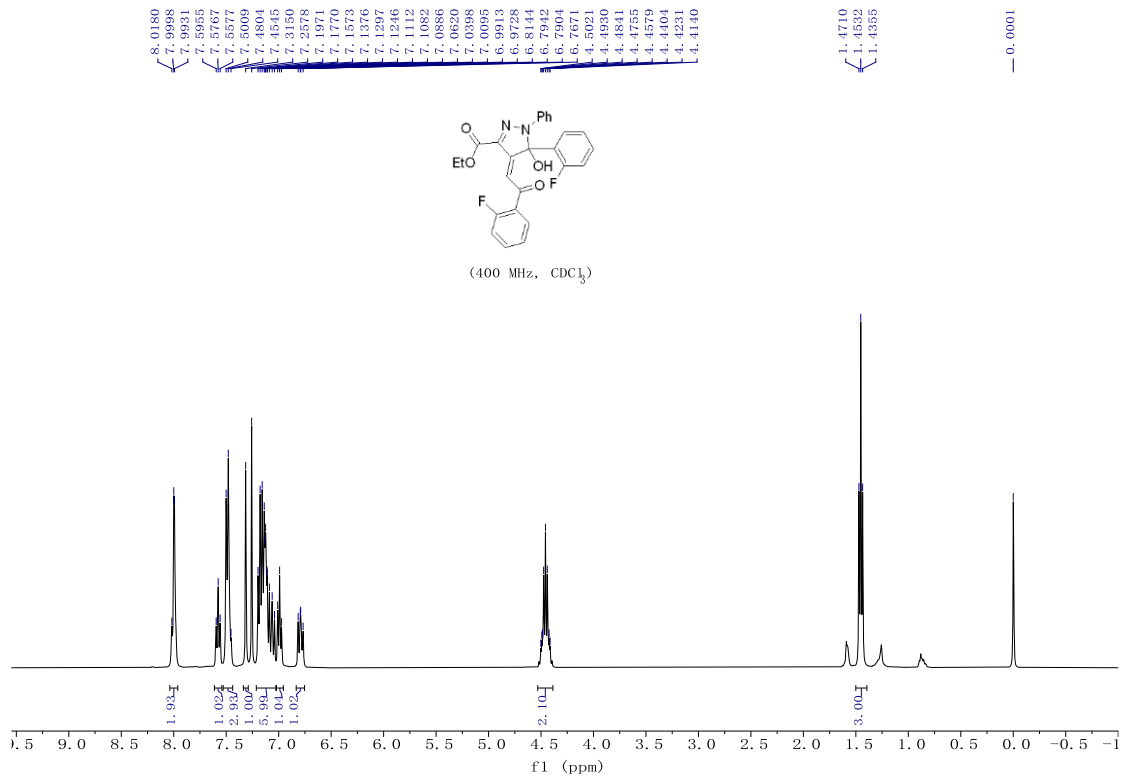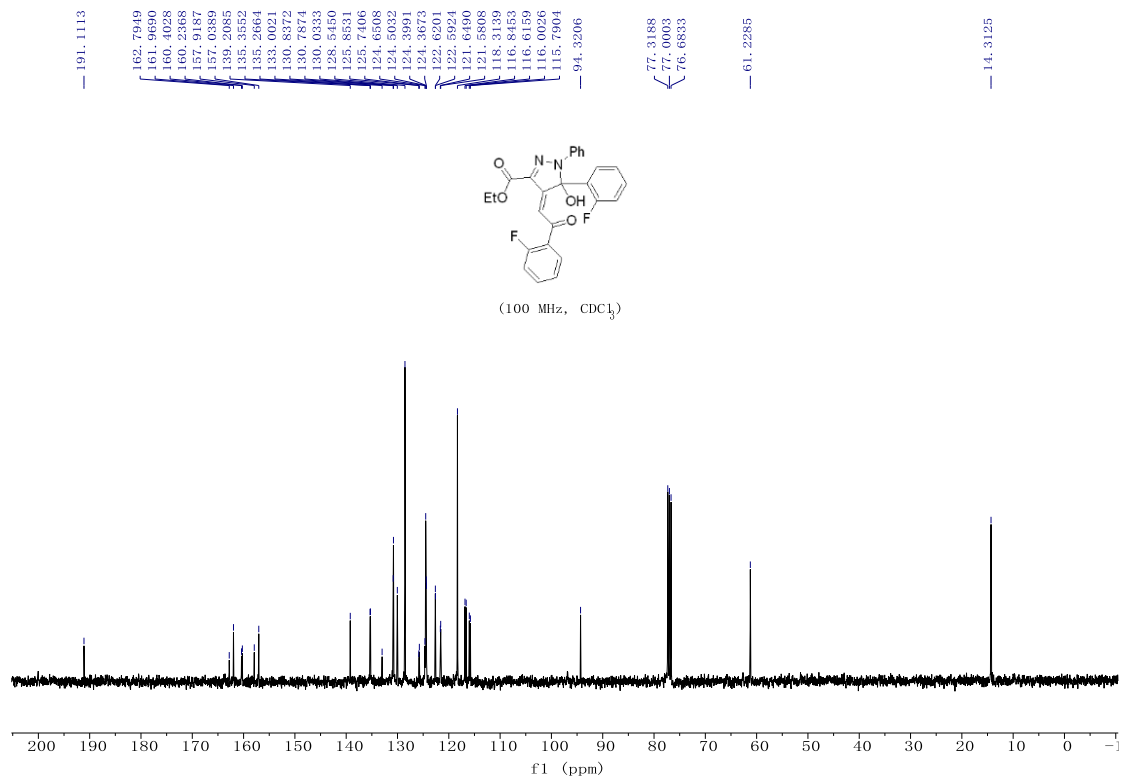

# <sup>1</sup>H NMR and <sup>13</sup>C NMR spectra of **3do**

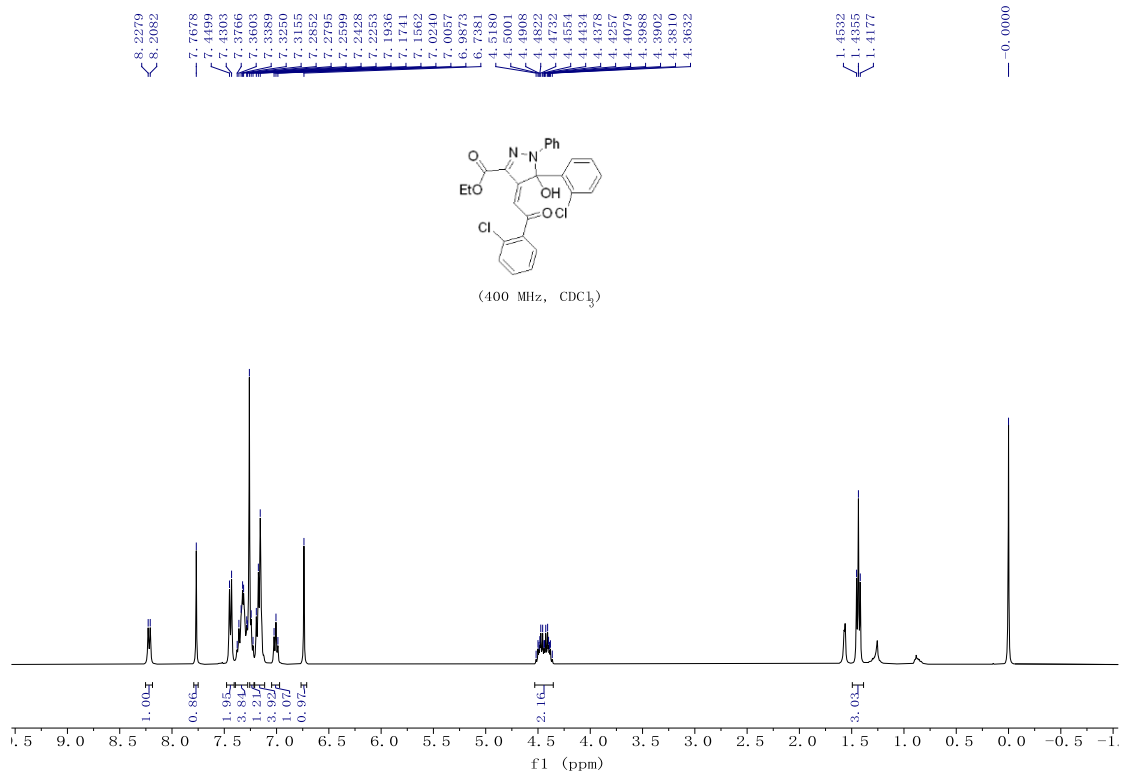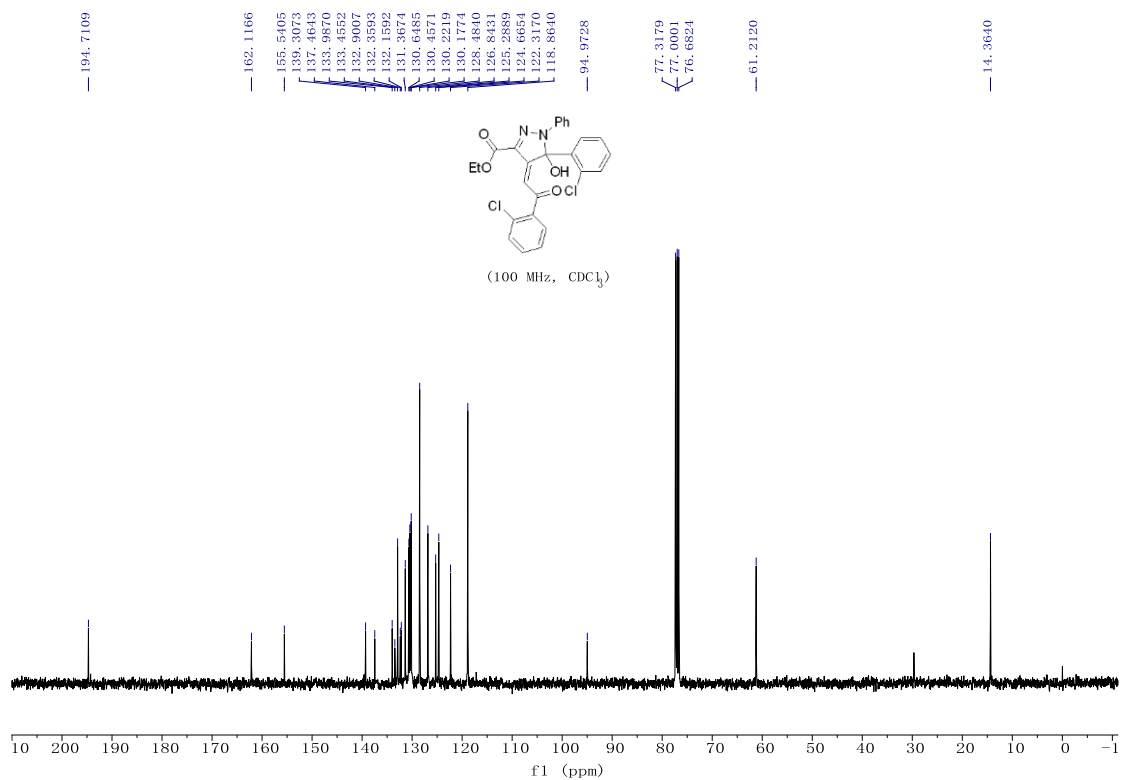



<sup>1</sup>H NMR and <sup>13</sup>C NMR spectrums of **3dp**

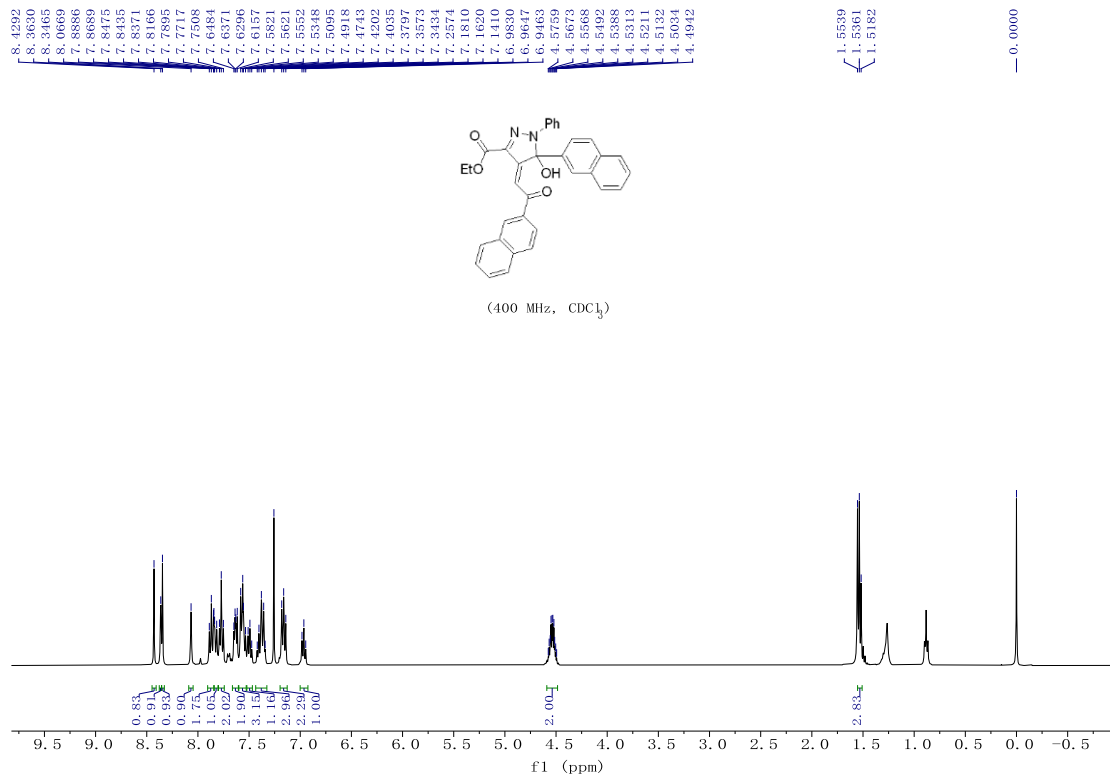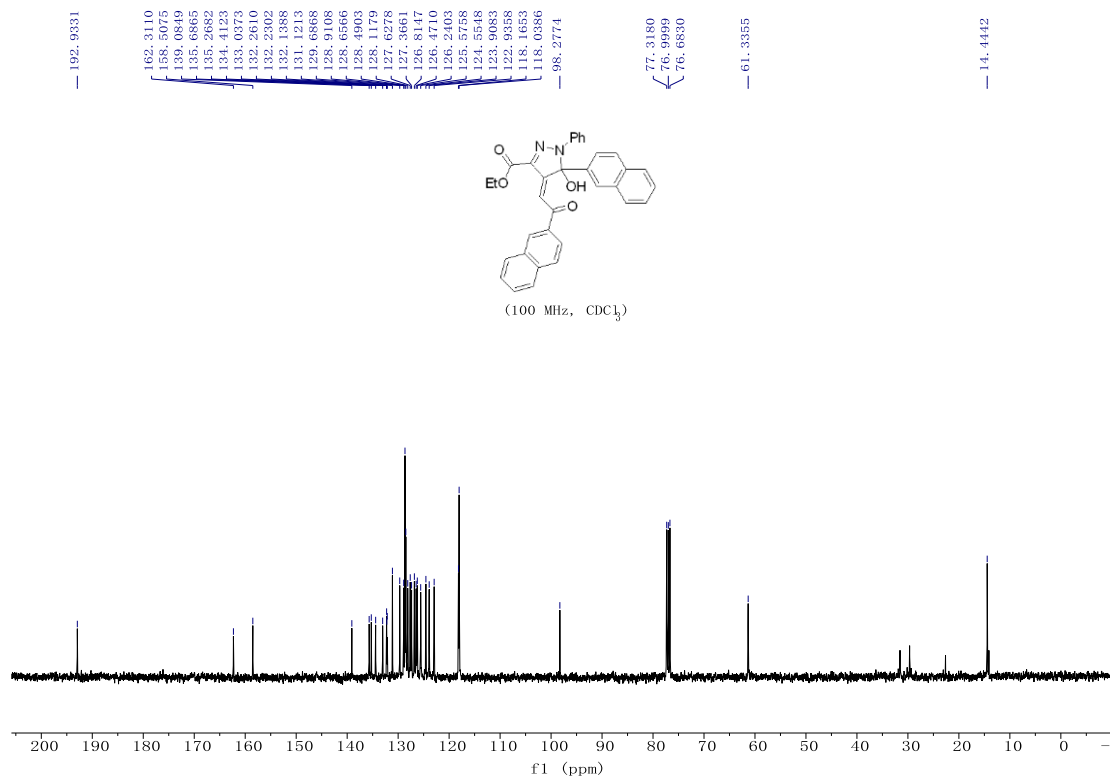

<sup>1</sup>H NMR and <sup>13</sup>C NMR spectra of **3dq**

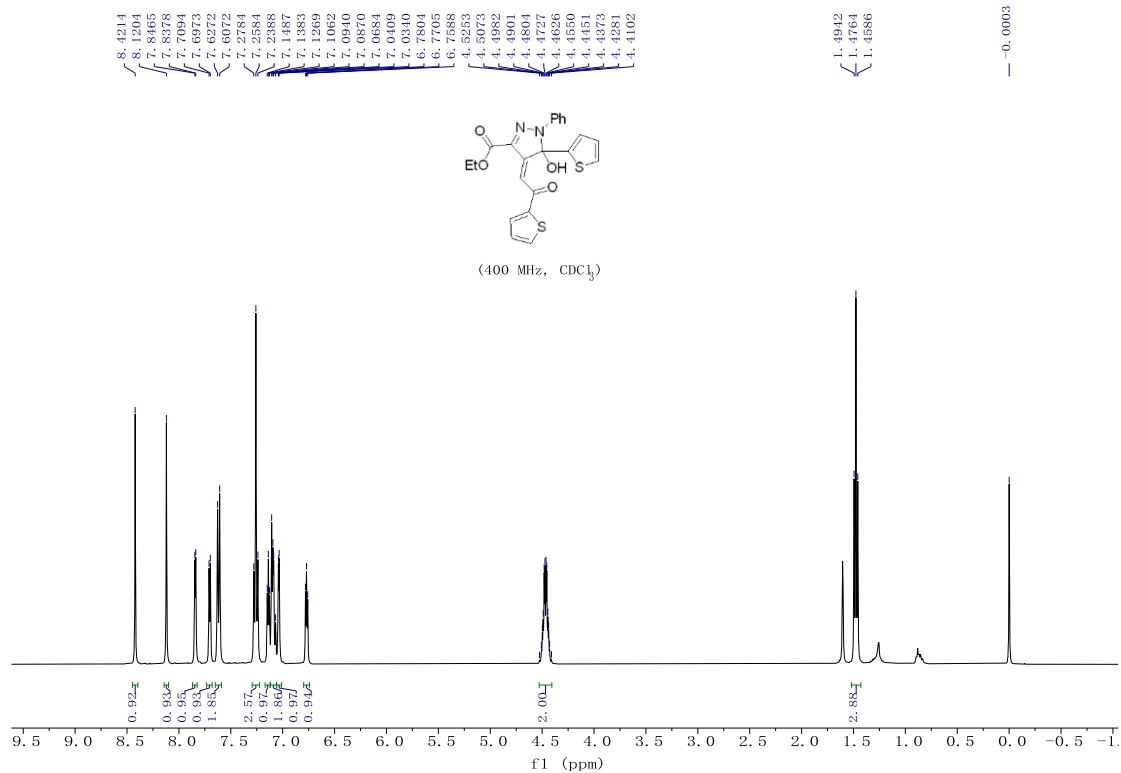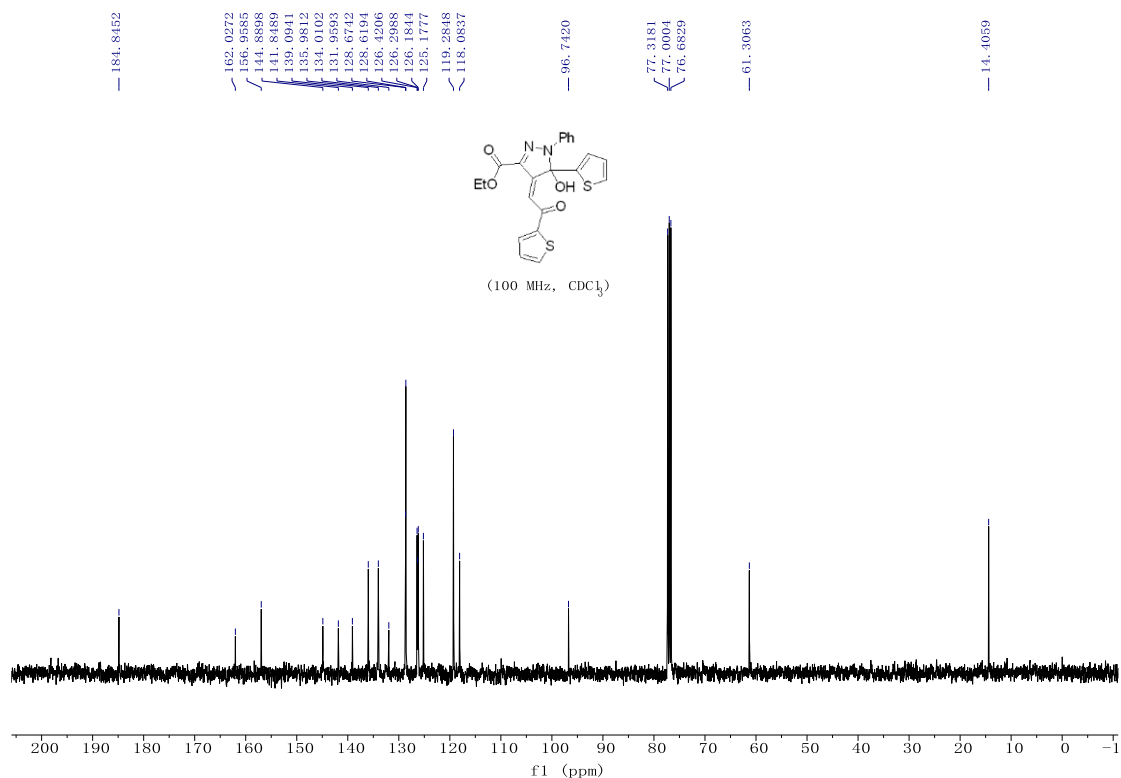

## 8. Crystal Structure Information of Compound **3aa**

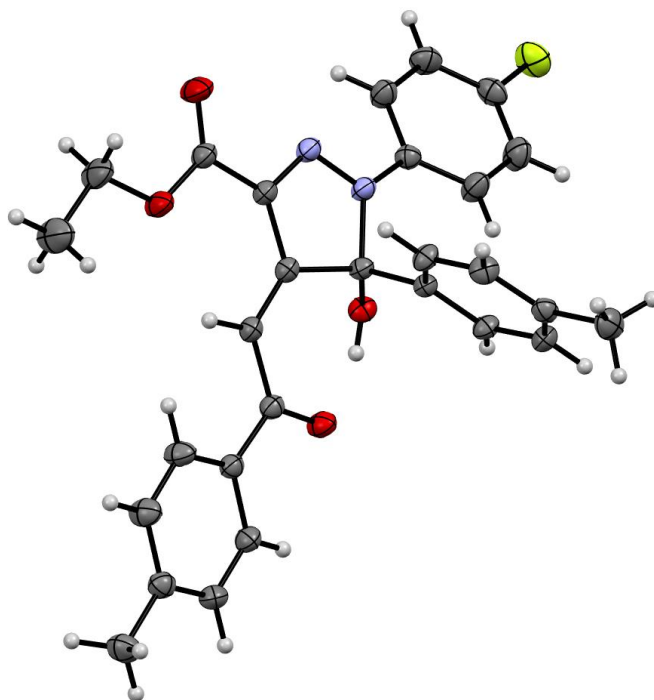

Thermal ellipsoids are drawn at the 30% probability levels

Red crystals of **3aa** were grown by layering a  $\text{CH}_2\text{Cl}_2$  solution with hexanes, which has been deposited at the Cambridge Crystallographic Date Center and allocated the deposition number CCDC 2126471. Single crystals were mounted on a sample holder and diffraction data were collected on an Agilent SuperNova diffractometer with  $\text{Mo K}_\alpha$  radiation at 295(2) K.

**Table 1 Crystal data and structure refinement for 3aa.**

|                                             |                                                                |
|---------------------------------------------|----------------------------------------------------------------|
| Identification code                         | <b>3aa</b>                                                     |
| Empirical formula                           | C <sub>28</sub> H <sub>25</sub> FN <sub>2</sub> O <sub>4</sub> |
| Formula weight                              | 472.50                                                         |
| Temperature/K                               | 295(2)                                                         |
| Crystal system                              | triclinic                                                      |
| Space group                                 | P-1                                                            |
| a/Å                                         | 8.0400(10)                                                     |
| b/Å                                         | 11.4719(7)                                                     |
| c/Å                                         | 12.7098(13)                                                    |
| α/°                                         | 87.546(7)                                                      |
| β/°                                         | 86.892(9)                                                      |
| γ/°                                         | 87.682(8)                                                      |
| Volume/Å <sup>3</sup>                       | 1168.6(2)                                                      |
| Z                                           | 2                                                              |
| ρ <sub>calc</sub> /cm <sup>3</sup>          | 1.343                                                          |
| μ/mm <sup>-1</sup>                          | 0.096                                                          |
| F(000)                                      | 496.0                                                          |
| Crystal size/mm <sup>3</sup>                | 0.35 × 0.33 × 0.3                                              |
| Radiation                                   | MoKα (λ = 0.71073)                                             |
| 2θ range for data collection/°              | 6.69 to 58.07                                                  |
| Index ranges                                | -10 ≤ h ≤ 10, -15 ≤ k ≤ 14, -17 ≤ l ≤ 12                       |
| Reflections collected                       | 8810                                                           |
| Independent reflections                     | 5290 [R <sub>int</sub> = 0.0236, R <sub>sigma</sub> = 0.0485]  |
| Data/restraints/parameters                  | 5290/0/320                                                     |
| Goodness-of-fit on F <sup>2</sup>           | 1.037                                                          |
| Final R indexes [I >= 2σ (I)]               | R <sub>1</sub> = 0.0615, wR <sub>2</sub> = 0.1564              |
| Final R indexes [all data]                  | R <sub>1</sub> = 0.0907, wR <sub>2</sub> = 0.1792              |
| Largest diff. peak/hole / e Å <sup>-3</sup> | 0.31/-0.21                                                     |

## 9. Crystal Structure Information of Compound 3ha

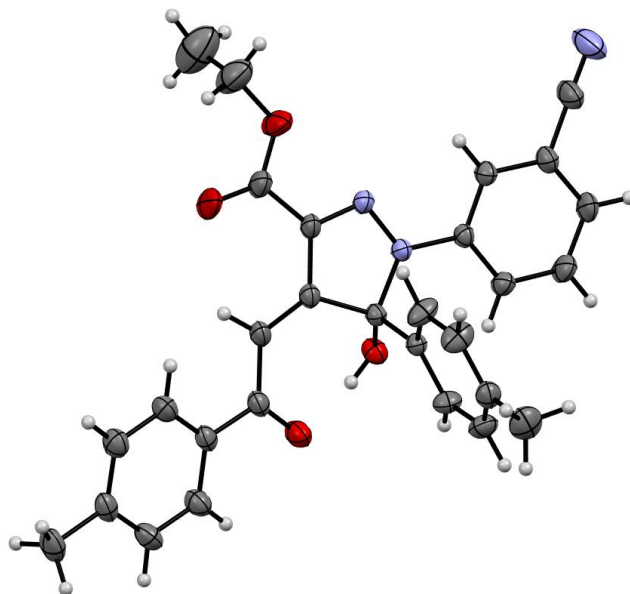

Thermal ellipsoids are drawn at the 30% probability levels

Red crystals of **3ha** were grown by layering a  $\text{CH}_2\text{Cl}_2$  solution with hexanes, which has been deposited at the Cambridge Crystallographic Date Center and allocated the deposition number CCDC 2126472. Single crystals were mounted on a sample holder and diffraction data were collected on an Agilent SuperNova diffractometer with  $\text{Mo K}_\alpha$  radiation at 293(2) K.

Table 1 Crystal data and structure refinement for **3ha**.

|                                             |                                                               |
|---------------------------------------------|---------------------------------------------------------------|
| Identification code                         | <b>3ha</b>                                                    |
| Empirical formula                           | C <sub>29</sub> H <sub>25</sub> N <sub>3</sub> O <sub>4</sub> |
| Formula weight                              | 479.52                                                        |
| Temperature/K                               | 293(2)                                                        |
| Crystal system                              | triclinic                                                     |
| Space group                                 | P-1                                                           |
| a/Å                                         | 7.9777(10)                                                    |
| b/Å                                         | 11.6675(11)                                                   |
| c/Å                                         | 13.8578(15)                                                   |
| α/°                                         | 84.971(8)                                                     |
| β/°                                         | 80.812(10)                                                    |
| γ/°                                         | 75.327(10)                                                    |
| Volume/Å <sup>3</sup>                       | 1230.3(2)                                                     |
| Z                                           | 2                                                             |
| ρ <sub>calc</sub> /cm <sup>3</sup>          | 1.294                                                         |
| μ/mm <sup>-1</sup>                          | 0.087                                                         |
| F(000)                                      | 504.0                                                         |
| Crystal size/mm <sup>3</sup>                | 0.71 × 0.45 × 0.42                                            |
| Radiation                                   | MoKα (λ = 0.71073)                                            |
| 2θ range for data collection/°              | 6.82 to 58.114                                                |
| Index ranges                                | -10 ≤ h ≤ 10, -15 ≤ k ≤ 14, -16 ≤ l ≤ 18                      |
| Reflections collected                       | 9051                                                          |
| Independent reflections                     | 5591 [R <sub>int</sub> = 0.0220, R <sub>sigma</sub> = 0.0469] |
| Data/restraints/parameters                  | 5591/2/329                                                    |
| Goodness-of-fit on F <sup>2</sup>           | 1.042                                                         |
| Final R indexes [I >= 2σ (I)]               | R <sub>1</sub> = 0.0704, wR <sub>2</sub> = 0.1754             |
| Final R indexes [all data]                  | R <sub>1</sub> = 0.1055, wR <sub>2</sub> = 0.2087             |
| Largest diff. peak/hole / e Å <sup>-3</sup> | 0.50/-0.44                                                    |

## 10. References

- (1). K. R. Mahendra and K. M. L. Rai, *Organic Chem Curr Res.*, 2016, **5**, 100175
- (2). (a) L.-Q. Lu, Y.-J. Cao, X.-P. Liu, J. An, C.-J. Yao, Z.-H. Ming and W.-J. Xiao, *J. Am. Chem. Soc.*, 2008, **130**, 6946. (b) K. W. Ratts and A.-N. Yao, *J. Org. Chem.*, 1966, **31**, 1185.
